# Supplementary material for: Uncovering the Hidden Risk Architecture of the Schizophrenias: Confirmation in Three Independent Genome-Wide Association Studies
Source: Atypon-hosted journal article supplement (doi:10.1176/appi.ajp.2014.14040435), 2014-09-15
Supplement: appi.ajp.2014.14040435.ds002_appendix.pdf [file appi.ajp.2014.14040435.ds002_appendix.pdf]

## Appendix I - Catalog of phenotypic features

|                           |    |
|---------------------------|----|
| Introduction .....        | 4  |
| Statistics .....          | 5  |
| Study .....               | 5  |
| Sex .....                 | 6  |
| Location .....            | 7  |
| Self-ident-ancestry ..... | 8  |
| Age-at-interview .....    | 9  |
| Digs .....                | 10 |
| Figs .....                | 11 |
| MedRec .....              | 12 |
| FH_psychosis .....        | 13 |
| Dx_cs_1 .....             | 14 |
| Aao_cs_1 .....            | 15 |
| Dx_cs_2 .....             | 16 |
| Dx_cs_3 .....             | 19 |
| dx_cs_4 .....             | 21 |
| Dx_cs_5 .....             | 22 |
| SumCritA .....            | 24 |
| Cs_A1 .....               | 26 |
| cs_A1a .....              | 27 |
| Cs_A2 .....               | 28 |
| cs_A2a .....              | 29 |
| Cs_A3 .....               | 30 |
| Cs_A4 .....               | 31 |
| Cs_A5 .....               | 32 |
| MonthsIll .....           | 33 |
| MonthsMood .....          | 34 |
| Auditory_Halns_Ever ..... | 35 |

|                                        |    |
|----------------------------------------|----|
| Visual_Halns_Ever .....                | 36 |
| Delusions_Ever .....                   | 37 |
| Current_Psychosis .....                | 38 |
| Current_Psychosis_Duration_Weeks ..... | 39 |
| Persecutory_Delusions .....            | 39 |
| Jealousy_Delusions .....               | 41 |
| Guilt_Sin_Delusions .....              | 42 |
| Grandiose_Delusions .....              | 43 |
| Religious_Delusions .....              | 44 |
| Somatic_Delusions .....                | 45 |
| Del_of_Ref.....                        | 46 |
| Being_Controlled.....                  | 47 |
| Del_Mind_Reading.....                  | 48 |
| Thought_Broadcasting .....             | 49 |
| Thought_Insert.....                    | 50 |
| Thought_Withdraw .....                 | 51 |
| Duration_Delusions_Weeks .....         | 52 |
| Delusion_Fragment .....                | 53 |
| Delusion_Widespread .....              | 54 |
| Delusion_Bizarre .....                 | 55 |
| AH(Voices_Noises_Music).....           | 56 |
| Running_Comment .....                  | 57 |
| Aud_2+_Voices.....                     | 58 |
| Thought_Echo .....                     | 59 |
| Audible_Thoughts .....                 | 60 |
| AH_See_person.....                     | 61 |
| Somatic_Tactile .....                  | 62 |
| Olfactory_Hal .....                    | 63 |
| Visual_Hal.....                        | 64 |
| Gustatory_Hal .....                    | 65 |
| Halluc_Longest_Days .....              | 66 |
| Hall_All_Day_Several_Days.....         | 67 |

|                                                |    |
|------------------------------------------------|----|
| Del_Also_Hal.....                              | 68 |
| AH_Threatening.....                            | 69 |
| Mood_Incongruent_Hal.....                      | 70 |
| Erotomaniac_Delusions.....                     | 71 |
| Odd_Behavior.....                              | 72 |
| Disorganized_Speech.....                       | 73 |
| Odd_Speech.....                                | 74 |
| Avolition_Apathy.....                          | 75 |
| No_Emotions.....                               | 76 |
| Onset_Del_Hal_Other.....                       | 77 |
| Psych_SX_Duration_Days.....                    | 78 |
| Psych_SX_Duration_Weeks.....                   | 79 |
| Return_Normal_for_2Months.....                 | 80 |
| Unable_To_Function.....                        | 81 |
| Polydypsia.....                                | 82 |
| Pattern_Sx.....                                | 83 |
| Severity_Pattern.....                          | 84 |
| Disorg/Inapp_Behav.....                        | 85 |
| Alogia.....                                    | 86 |
| Unable_To_Function_Most_Time_Since_Onset.....  | 87 |
| Classification_Longitud_SZ.....                | 88 |
| DSM4_Delusions.....                            | 89 |
| DSM4_Definite_Bizarre_Del.....                 | 90 |
| DSM4_Hallucinations.....                       | 91 |
| DSM4_2+Voices_Commented.....                   | 92 |
| DSM4_Disorganized_Speech.....                  | 93 |
| DSM4_Gross_Disorganization.....                | 94 |
| DSM4_Negative_Sx.....                          | 95 |
| Total_DSM4_Sx.....                             | 96 |
| Psychosis_without_Dep_Mania.....               | 97 |
| Psychosis_without_Dep_Mania_>=1week[A62a]..... | 98 |



## Introduction

This document lists all variables showing graphs of occurrences of the different values of these variables for different studies of schizophrenia.

Studies that are used are called:

- 16638 NON-GAIN GRU
- 16640 NON-GAIN SARC
- 16648 GAIN GRU V13 EA
- 16648 GAIN GRU V14 AA
- 16649 GAIN SARC V13 EA
- 16649 GAIN SARC V14 AA

## Statistics

### Study

Selected attribute

|                 |             |                |
|-----------------|-------------|----------------|
| Name: Study     | Distinct: 4 | Type: Nominal  |
| Missing: 0 (0%) |             | Unique: 0 (0%) |

| No. | Label | Count |
|-----|-------|-------|
| 1   | MGS2  | 3635  |
| 2   | SGI   | 108   |
| 3   | MGS1  | 438   |
| 4   | Study | 2     |

No class Visualize All

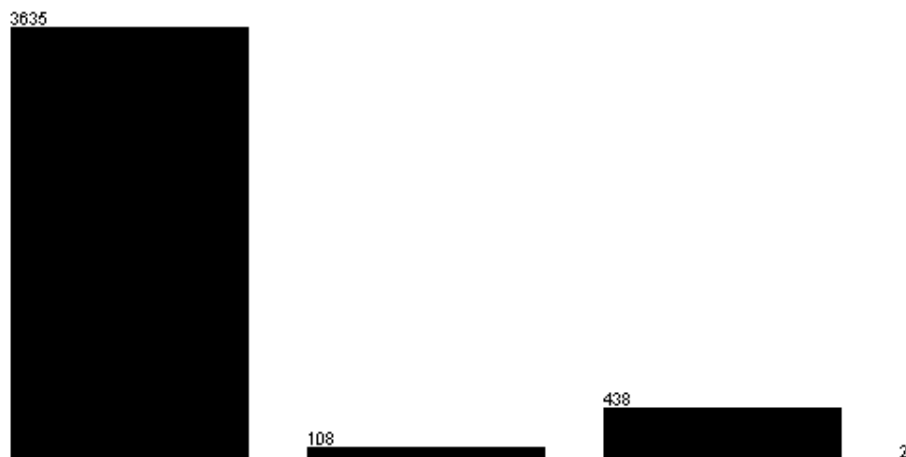

**Variable id="phv00071337.v1"**

**Description:** MGS1 (our affected sib pair study) or MGS2 (the current case-control study) or SGI (a previous affected sib pair study).

**Value:** code="MGS1" Our affected sib pair study

**Value:** code="MGS2" Case-control study

**Value:** code="SGI" A previous affected sib pair study

## Sex

Selected attribute

Name: Sex  
Missing: 0 (0%)

Distinct: 3

Type: Nominal  
Unique: 0 (0%)

| No. | Label | Count |
|-----|-------|-------|
| 1   | 1.0   | 2805  |
| 2   | 2.0   | 1376  |
| 3   | Sex   | 2     |

No class Visualize All

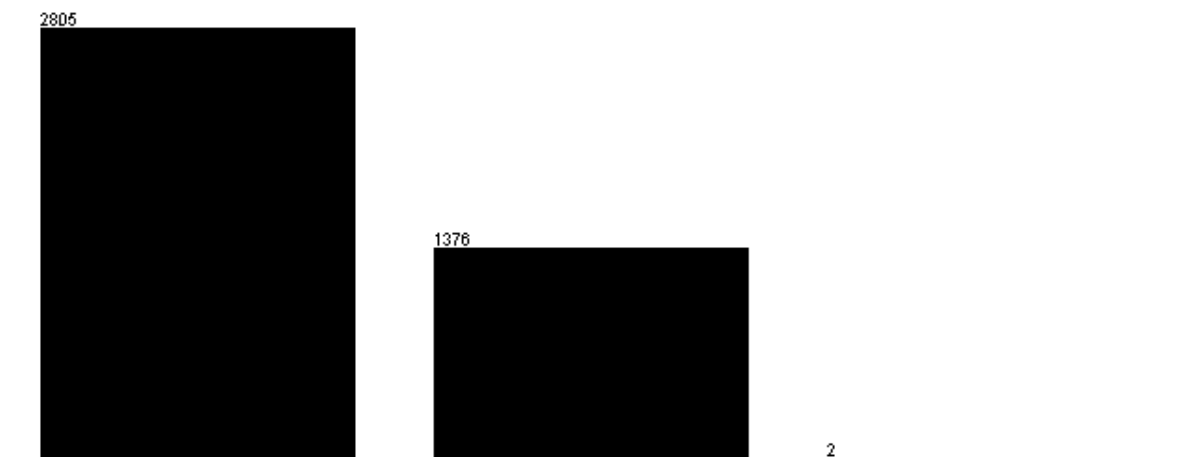

**Variable id="phv00071338.v1"**

**Tipo:** integer

**Value:** code="1" Male

**Value:** code="2" Female

## Location

| Selected attribute |          |                |
|--------------------|----------|----------------|
| Name: Location     |          | Type: Nominal  |
| Missing: 0 (0%)    |          | Distinct: 13   |
|                    |          | Unique: 0 (0%) |
| No.                | Label    | Count          |
| 1                  | CA       | 337            |
| 2                  | LA       | 273            |
| 3                  | IL       | 509            |
| 4                  | CO       | 542            |
| 5                  | GA       | 463            |
| 6                  | NY       | 325            |
| 7                  | PA       | 330            |
| 8                  | MO       | 446            |
| 9                  | MA       | 38             |
| 10                 | AU       | 684            |
| 11                 | IA       | 227            |
| 12                 | Location | 2              |
| 13                 | TX       | 7              |

Class: Ethnicity\_other[I220] (Nom) Visualize All

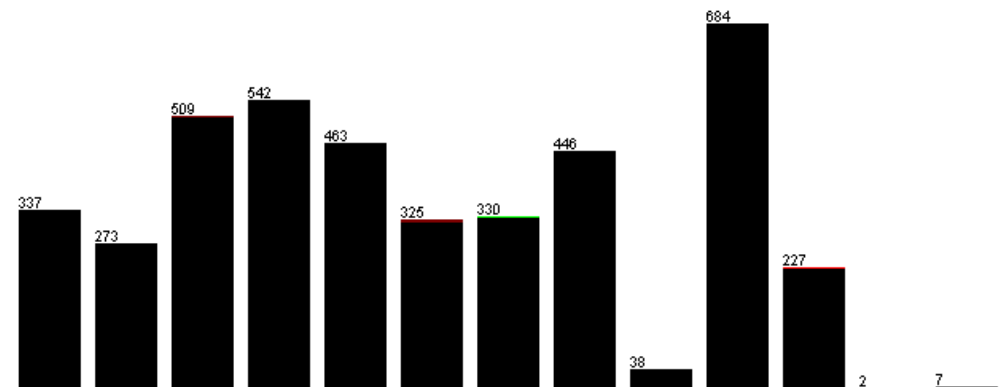

Variable id="phv00071340.v1"

**Description:** Study location (geographical) that recruited and evaluated the subject

**Value:** code="AU" Australia

**Value:** code="CA" California

**Value:** code="CO" Colorado

**Value:** code="GA" Georgia (previously Houston)

**Value:** code="IA" Iowa

**Value:** code="IL" Illinois

**Value:** code="LA" Louisiana

**Value:** code="MA" Massachusetts

**Value:** code="MO" Missouri

**Value:** code="NY" New York

**Value:** code="PA" Pennsylvania



## Self-ident-ancestry

Selected attribute

|                           |             |                |
|---------------------------|-------------|----------------|
| Name: Self-ident-ancestry | Distinct: 3 | Type: Nominal  |
| Missing: 0 (0%)           |             | Unique: 0 (0%) |

| No. | Label               | Count |
|-----|---------------------|-------|
| 1   | AA                  | 1337  |
| 2   | EA                  | 2844  |
| 3   | Self-ident-ancestry | 2     |

Class: Ethnicity\_other[I220] (Nom) Visualize All

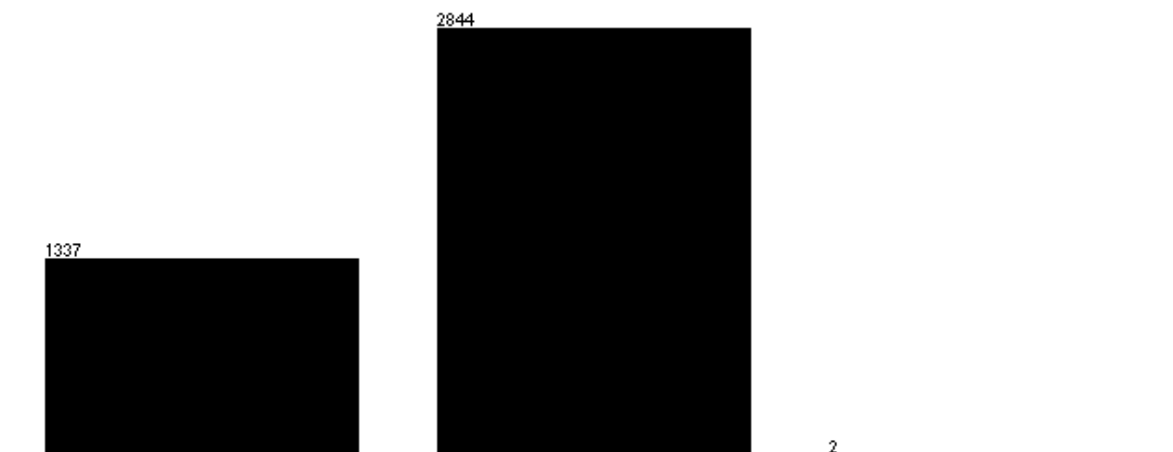

**Variable id="phv00071341.v1"**

**Description:** Self-identified ethnic ancestry

**Value:** code="AA" African American

**Value:** code="EA" European Ancestry

## Age-at-interview

Selected attribute

Name: Age\_at\_interview  
Missing: 49 (1%)  
Distinct: 67  
Type: Nominal  
Unique: 5 (0%)

| No. | Label | Count |
|-----|-------|-------|
| 17  | 34.0  | 88    |
| 18  | 26.0  | 65    |
| 19  | 48.0  | 160   |
| 20  | 41.0  | 139   |
| 21  | 36.0  | 103   |
| 22  | 19.0  | 29    |
| 23  | 55.0  | 86    |
| 24  | 45.0  | 173   |
| 25  | 42.0  | 138   |
| 26  | 44.0  | 135   |
| 27  | 46.0  | 150   |
| 28  | 49.0  | 145   |
| 29  | 24.0  | 52    |

Class: Study (Nom) Visualize All

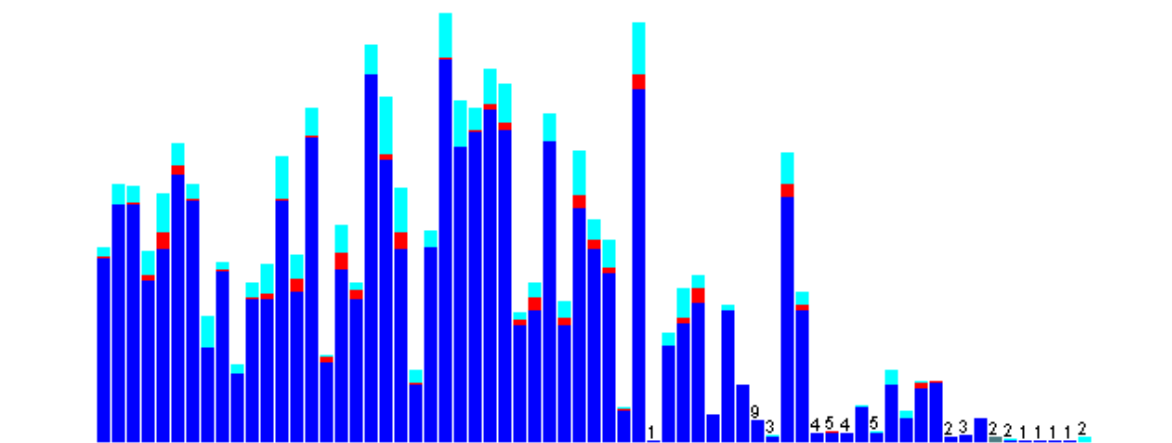

Variable id="phv00071342.v1"

**Description:** Age at which the subject was interviewed (NA means not available, true age of subject could not be determined, duration of illness estimated)

**Value:** Years old

## Digs

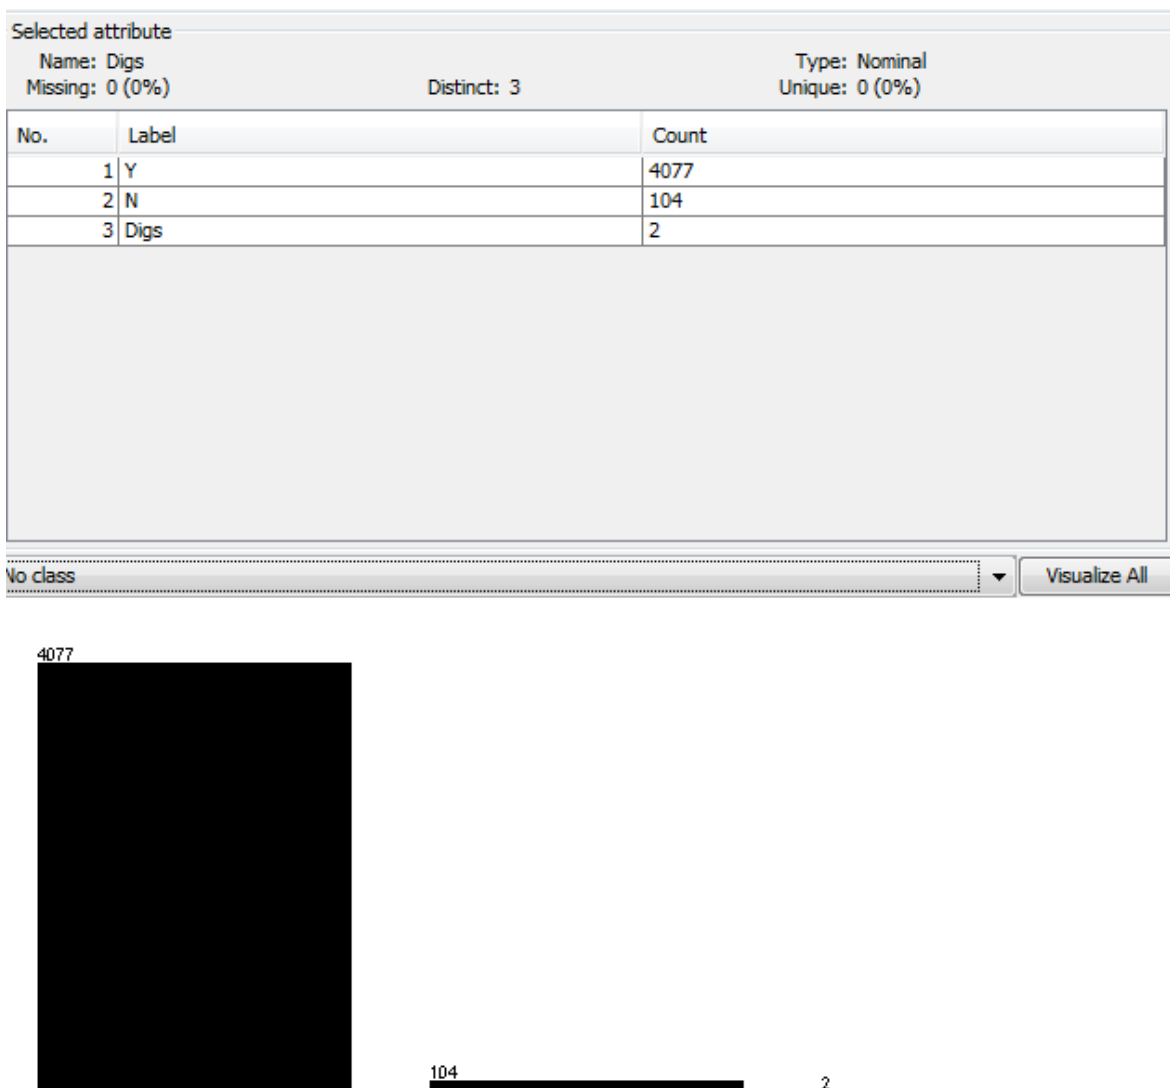

**Variable id**="phv00071343.v1"

**Description:** Was the subject able to complete an in-person diagnostic interview (DIGS) (i.e., some schizophrenia patients cannot participate adequately to provide valid information, but are willing to consent for the other aspects of the study including obtaining medical records)

**Value:** code="N" Did not complete interview

**Value:** code="Y" Completed interview

## Figs

Selected attribute

Name: Figs  
Missing: 0 (0%)

Distinct: 3

Type: Nominal  
Unique: 0 (0%)

| No. | Label | Count |
|-----|-------|-------|
| 1   | N     | 2803  |
| 2   | Y     | 1378  |
| 3   | Figs  | 2     |

No class Visualize All

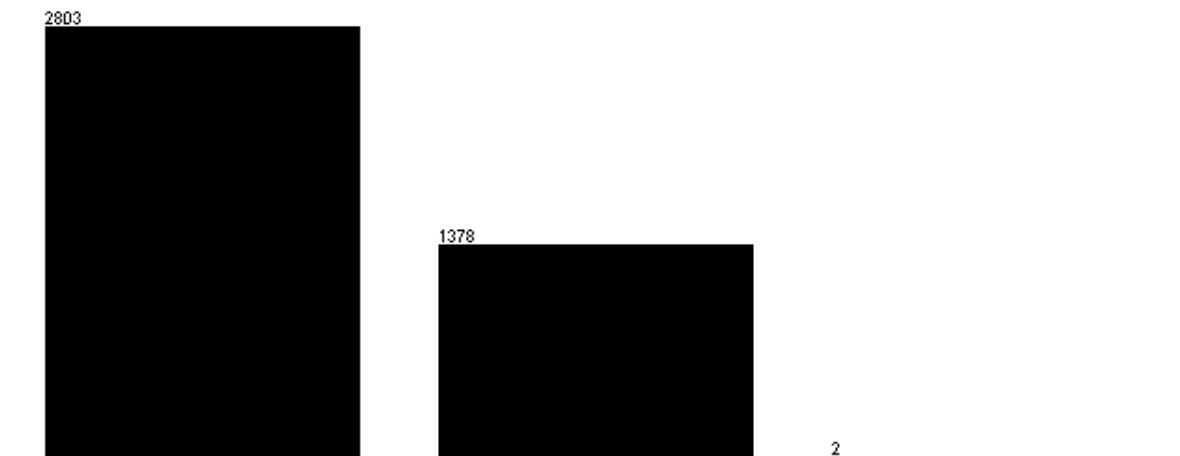

**Variable id="phv00071344.v1"**

**Description:** Did at least one family member provide a FIGS interview to provide observations on the subject's psychiatric history and symptom

**Value:** code="N" No FIGS obtained

**Value:** code="Y" FIGS obtained from informant

## MedRec

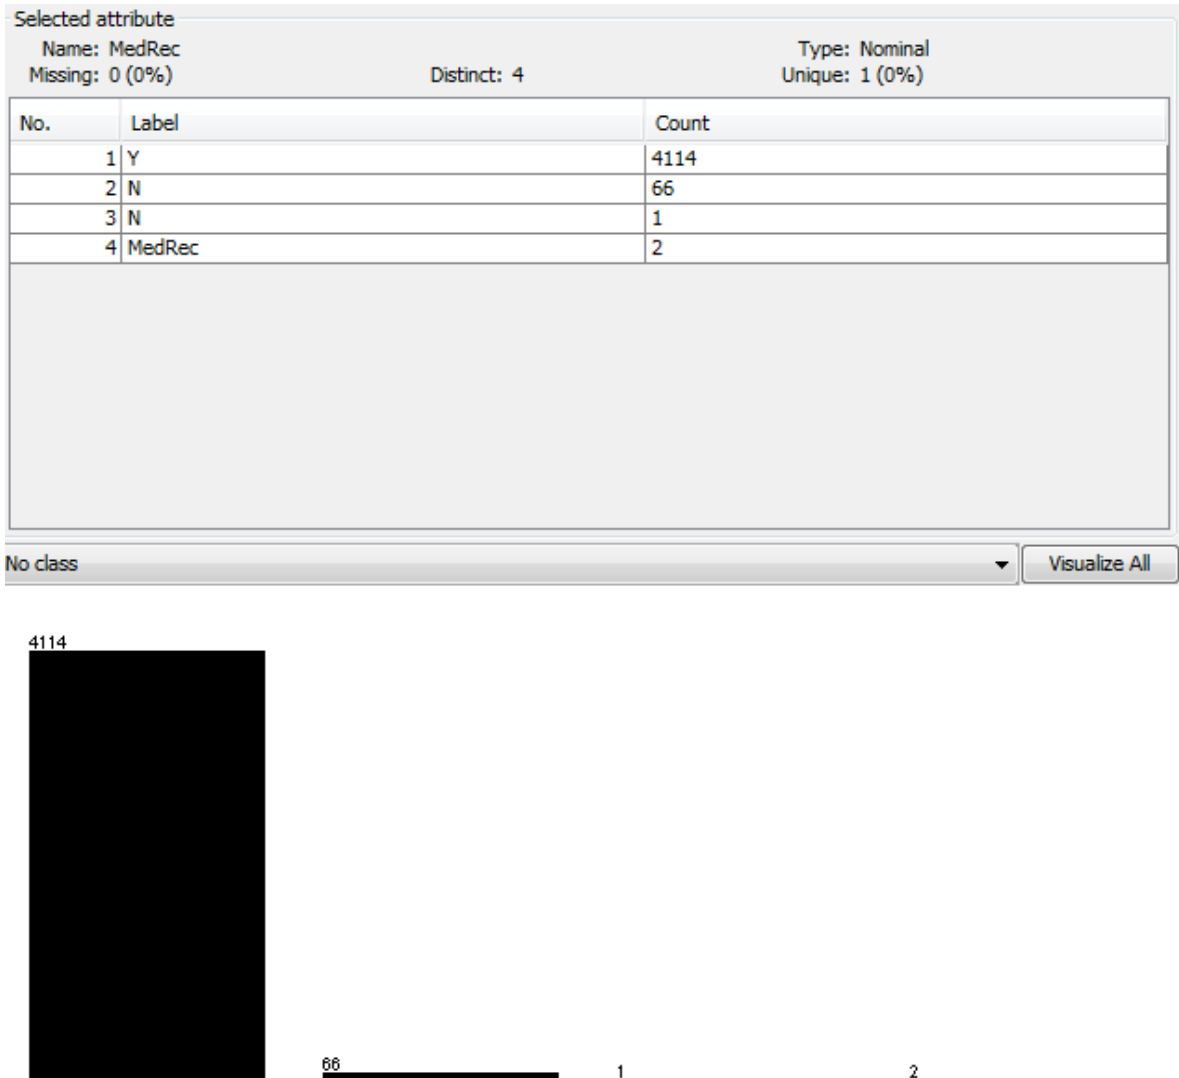

**Variable id**="phv00071345.v1"

**Description:** Was at least 1 record obtained from a hospital, clinic or clinician about the subject's psychiatric history?

**Value:** code="N" 0 records obtained

**Value:** code="Y" More or equivalent to 1 medical record obtained

## FH\_psychosis

Selected attribute

Name: FH\_psychosis  
Missing: 0 (0%)  
Distinct: 4

Type: Nominal  
Unique: 0 (0%)

| No. | Label        | Count |
|-----|--------------|-------|
| 1   | 1.0          | 577   |
| 2   | 0.0          | 2888  |
| 3   | 2.0          | 716   |
| 4   | FH_psychosis | 2     |

No class Visualize All

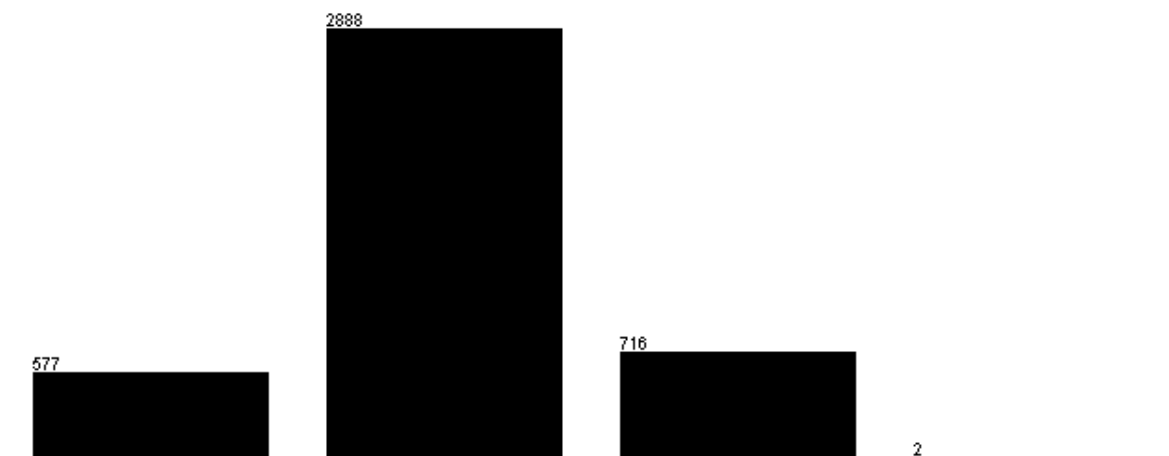

**Variable id="phv00071346.v1"**

**Description:** Was there evidence of a history of psychotic illness in relatives?

**Value:** code="0" No evidence of family history of a psychotic illness (MGS2 cases, complete assessment of family not made)

**Value:** code="1" Suspected history of psychotic disorder in a first- or second-degree relative (MGS2, see protocol description)

**Value:** code="2" Definite history of psychotic disorder in a sibling, half sibling or parent (MGS1, all diagnoses in relatives were based on full in-person assessment and consensus diagnosis)

## Dx\_cs\_1

Selected attribute

Name: dx\_cs\_1  
Missing: 0 (0%)

Distinct: 4

Type: Nominal  
Unique: 0 (0%)

| No. | Label   | Count |
|-----|---------|-------|
| 1   | 295.XX  | 3747  |
| 2   | 295.70M | 248   |
| 3   | 295.7   | 186   |
| 4   | dx_cs_1 | 2     |

No class Visualize All

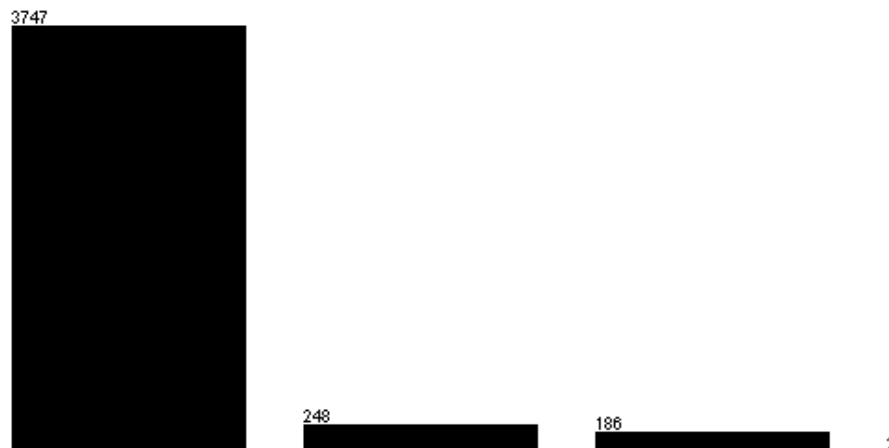

**Variable id="phv00071347.v1"**

**Description:**DSM-IV diagnosis code for the Best Estimate Final Diagnosis (code numbers)

**Value:** code="295.70D" Schizoaffective depressed disorder

**Value:** code="295.70M" Schizoaffective bipolar disorder

**Value:** code="295.XX" Schizophrenia

## Aao\_cs\_1

Selected attribute

Name: aao\_cs\_1  
Missing: 135 (3%)

Distinct: 58

Type: Nominal  
Unique: 5 (0%)

| No. | Label | Count |
|-----|-------|-------|
| 1   | 21.0  | 310   |
| 2   | 28.0  | 97    |
| 3   | 18.0  | 367   |
| 4   | 22.0  | 203   |
| 5   | 17.0  | 290   |
| 6   | 20.0  | 297   |
| 7   | 14.0  | 115   |
| 8   | 19.0  | 359   |
| 9   | 16.0  | 265   |
| 10  | 23.0  | 195   |
| 11  | 12.0  | 76    |
| 12  | 39.0  | 16    |
| 13  | 26.0  | 90    |

No class

Visualize All

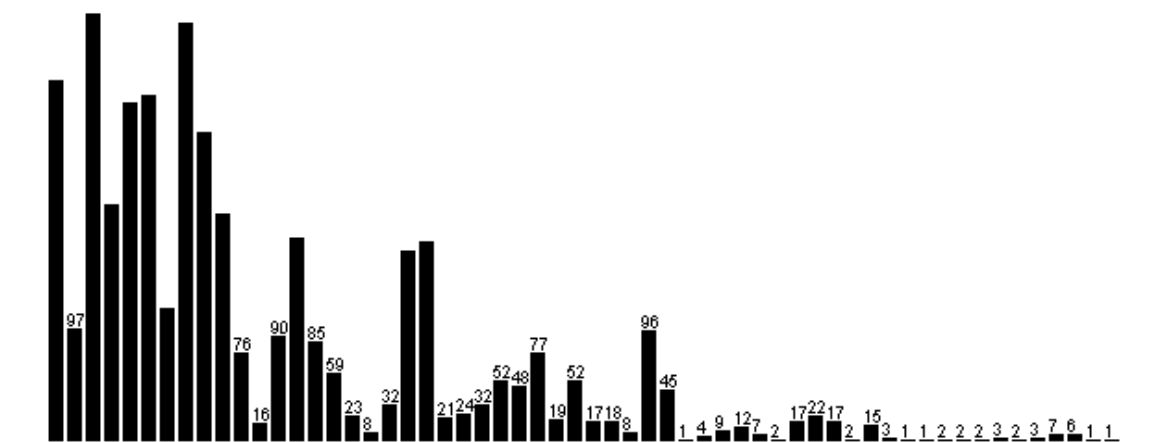

**Variable id="phv00071349.v1"**

**Description:**Consensus age at onset (most likely age for onset of psychotic symptoms consistent with the onset of schizophrenia or schizoaffective disorder)



## Dx\_cs\_2

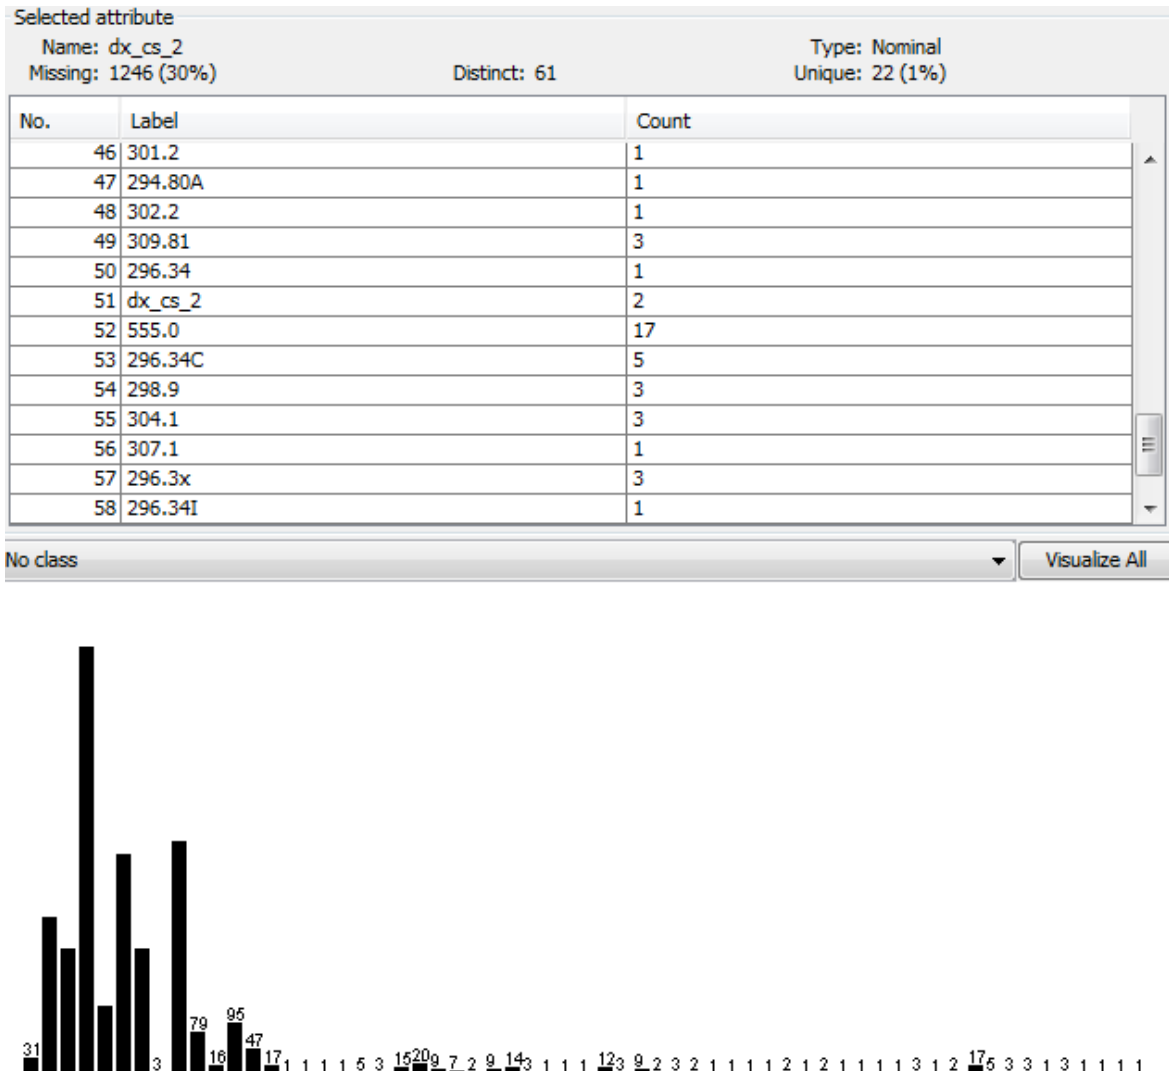

**Variable id="phv00071350.v1"**

**Description:** DSM-IV diagnosis code for any additional psychiatric or substance use disorder supported by the data, determined by consensus (up to 4 secondary diagnoses included in file). Code numbers (see the DSM-IV manual for all psychiatric disorders)

**Value:** code="291.2" Alcohol-induced persisting dementia

**Value:** code="292.12" Substance-induced psychotic disorder, with hallucinations

**Value:** code="293.83" Mood disorder due to the general medical condition

**Value:** code="296.2" Major depressive disorder, single episode, unspecified

**Value:** code="296.3" Major depressive disorder, recurrent, unspecified

**Value:** code="296.34" Major depressive disorder, recurrent, severe with psychotic features

**Value:** code="296.8" Bipolar disorder NOS

**Value:** code="299.8" Pervasive developmental disorder NOS  
**Value:** code="300.21" Panic disorder with agoraphobia  
**Value:** code="300.23" Social phobia  
**Value:** code="300.3" Obsessive-compulsive disorder  
**Value:** code="301.2" Schizoid personality disorder  
**Value:** code="301.7" Antisocial personality disorder  
**Value:** code="301.8" Narcissistic Personality Disorder, or Avoidant Personality Disorder, or  
Borderline Personality Disorder, or Passive aggressive personality disorder  
**Value:** code="301.83" Borderline personality disorder  
**Value:** code="302.2" Pedophilia  
**Value:** code="303.9" Alcohol dependence  
**Value:** code="304" Opioid dependence  
**Value:** code="304.2" Cocaine dependence  
**Value:** code="304.3" Cannabis dependence  
**Value:** code="304.4" Amphetamine dependence  
**Value:** code="304.5" Hallucinogen dependence  
**Value:** code="304.6" Inhalant dependence  
**Value:** code="304.8" Polysubstance dependence  
**Value:** code="305" Alcohol abuse  
**Value:** code="305.1" Nicotine dependence  
**Value:** code="305.2" Cannabis abuse  
**Value:** code="305.3" Hallucinogen abuse  
**Value:** code="305.4" Sedative, hypnotic, or anxiolytic abuse  
**Value:** code="305.5" Opioid abuse  
**Value:** code="305.6" Cocaine abuse  
**Value:** code="305.7" Amphetamine abuse  
**Value:** code="305.9" Caffeine Intoxication  
**Value:** code="307.6" Enuresis (not due to a general medical condition)  
**Value:** code="309.81" Posttraumatic stress disorder  
**Value:** code="311" Depressive disorder NOS  
**Value:** code="312.8" Conduct disorder  
**Value:** code="312.9" Disruptive behavior disorder NOS  
**Value:** code="314.01" Attention-deficit hyperactivity disorder  
**Value:** code="315" Reading disorder  
**Value:** code="315.9" Learning disorder NOS  
**Value:** code="317" Mild mental retardation  
**Value:** code="318" Moderate mental retardation  
**Value:** code="294.80A" Amnestic disorder NOS  
**Value:** code="296.2X" Major depressive disorder single episode  
**Value:** code="296.2x" Major depressive disorder single episode  
**Value:** code="296.70A" Bipolar disorder, NOS

**Value:** code="304.50B" Phencyclidine (PCP) or similarly acting arylcyclohexylamine dependence

**Value:** code="304.90A" Other (or unknown) substance dependence

**Value:** code="305.20A" Cannabis abuse

## Dx\_cs\_3

| Selected attribute  |         |                 |
|---------------------|---------|-----------------|
| Name: dx_cs_3       |         | Type: Nominal   |
| Missing: 2228 (53%) |         | Distinct: 52    |
|                     |         | Unique: 17 (0%) |
| No.                 | Label   | Count           |
| 40                  | 305.90B | 1               |
| 41                  | 305.90C | 1               |
| 42                  | 292.11G | 1               |
| 43                  | 296.3   | 2               |
| 44                  | 292.84  | 2               |
| 45                  | 304.90B | 1               |
| 46                  | 555.0   | 12              |
| 47                  | 296.3x  | 5               |
| 48                  | 307.1   | 2               |
| 49                  | 296.34C | 1               |
| 50                  | 298.9   | 2               |
| 51                  | 293.81  | 1               |
| 52                  | 296.32  | 1               |

No class Visualize All

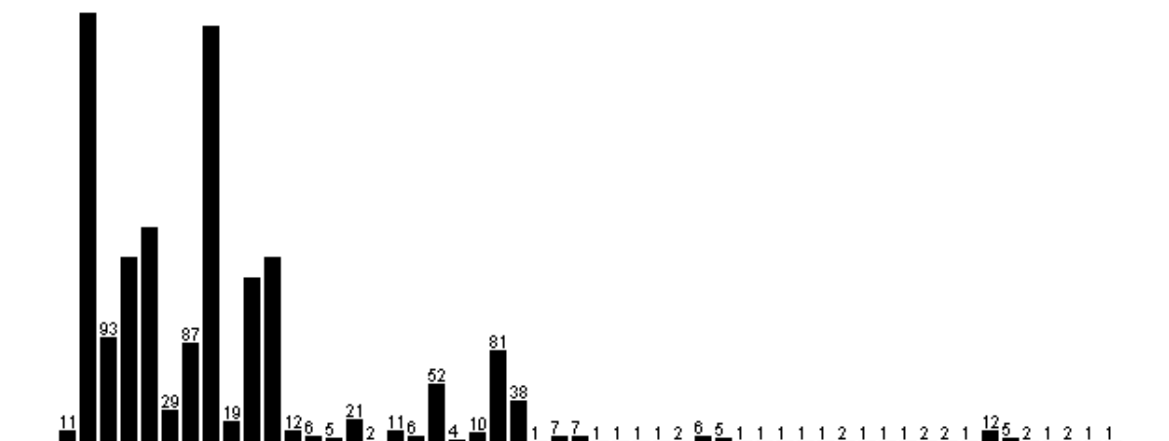

Variable id="phv00071353.v1"

**Description:** DSM-IV diagnosis code for any additional psychiatric or substance use disorder supported by the data, determined by consensus (up to 4 secondary diagnoses included in file).

Code numbers (see the DSM-IV manual for all psychiatric disorders)

**Value:** code="296.2" Major depressive disorder, single episode, unspecified

**Value:** code="296.8" Bipolar disorder NOS

**Value:** code="299" Autistic disorder

**Value:** code="299.8" Pervasive developmental disorder NOS

**Value:** code="300.3" Obsessive-compulsive disorder

**Value:** code="300.4" Dysthymic disorder

**Value:** code="301.7" Antisocial personality disorder  
**Value:** code="303.9" Alcohol dependence  
**Value:** code="304" Opioid dependence  
**Value:** code="304.1" Sedative, hypnotic, or anxiolytic dependence  
**Value:** code="304.2" Cocaine dependence  
**Value:** code="304.3" Cannabis dependence  
**Value:** code="304.4" Amphetamine or similarly acting sympathomimetic dependence  
**Value:** code="304.5" Hallucinogen dependence  
**Value:** code="304.6" Inhalant dependence  
**Value:** code="304.8" Polysubstance dependence  
**Value:** code="305" Alcohol abuse  
**Value:** code="305.1" Nicotine dependence  
**Value:** code="305.2" Cannabis abuse  
**Value:** code="305.3" Hallucinogen abuse  
**Value:** code="305.4" Sedative, hypnotic, or anxiolytic abuse  
**Value:** code="305.5" Opioid abuse  
**Value:** code="305.6" Cocaine abuse  
**Value:** code="305.7" Amphetamine abuse  
**Value:** code="305.9" Caffeine Intoxication  
**Value:** code="307.6" Enuresis (not due to a general medical condition)  
**Value:** code="311" Depressive disorder NOS  
**Value:** code="312.8" Conduct disorder  
**Value:** code="312.9" Disruptive behavior disorder NOS  
**Value:** code="314.01" Attention-deficit hyperactivity disorder  
**Value:** code="315" Reading disorder  
**Value:** code="315.2" Disorder of written expression  
**Value:** code="317" Mild mental retardation  
**Value:** code="296.2X" Major depressive disorder single episode  
**Value:** code="305.20A" Cannabis abuse  
**Value:** code="305.60A" Cocaine abuse  
**Value:** code="305.70B" Amphetamine abuse  
**Value:** code="305.90D" Phencyclidine abuse  
**Value:** code="315.31B" Developmental receptive language disorder

## dx\_cs\_4

Selected attribute

Name: dx\_cs\_4  
Missing: 3089 (74%)

Distinct: 47

Type: Nominal  
Unique: 16 (0%)

| No. | Label  | Count |
|-----|--------|-------|
| 1   | 305.2  | 113   |
| 2   | 305.7  | 76    |
| 3   | 304.1  | 15    |
| 4   | 304.0  | 39    |
| 5   | 305.5  | 28    |
| 6   | 296.8  | 42    |
| 7   | 304.2  | 149   |
| 8   | 296.2X | 2     |
| 9   | 311.0  | 103   |
| 10  | 304.4  | 64    |
| 11  | 304.5  | 22    |
| 12  | 305.6  | 91    |
| 13  | V40.00 | 1     |

No class

Visualize All

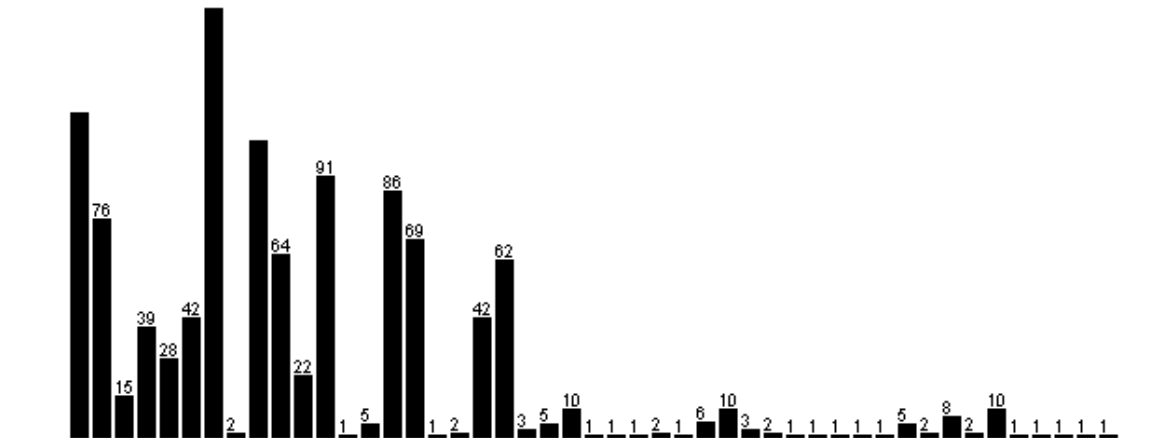

Has the same values as the previous variable

## Dx\_cs\_5

Selected attribute

Name: dx\_cs\_5  
Missing: 3646 (87%)

Distinct: 38

Type: Nominal  
Unique: 15 (0%)

| No. | Label   | Count |
|-----|---------|-------|
| 1   | 296.74C | 1     |
| 2   | 304.4   | 44    |
| 3   | 296.3X  | 1     |
| 4   | 311.0   | 66    |
| 5   | 304.5   | 20    |
| 6   | 296.8   | 32    |
| 7   | 304.2   | 41    |
| 8   | 305.90A | 1     |
| 9   | 305.0   | 31    |
| 10  | 305.2   | 32    |
| 11  | 305.6   | 33    |
| 12  | 305.4   | 10    |
| 13  | 304.3   | 20    |

No class

Visualize All

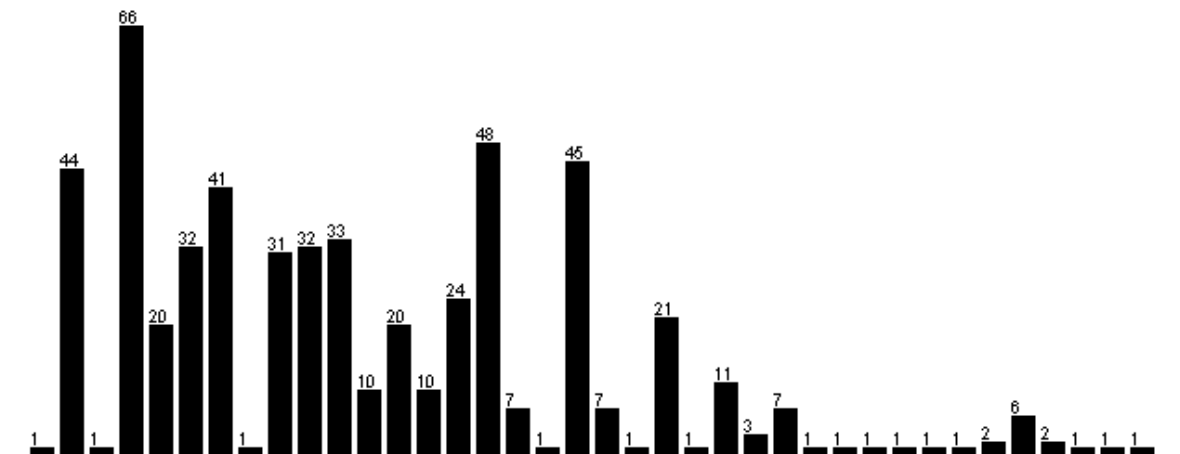

Variable id="phv00071359.v1"

**Description:** DSM-IV diagnosis code for any additional psychiatric or substance use disorder supported by the data, determined by consensus (up to 4 secondary diagnoses included in file). Code numbers (see the DSM-IV manual for all psychiatric disorders)

**Value:** code="296.2" Major depressive disorder, single episode, unspecified

**Value:** code="296.3" Major depressive disorder, recurrent, unspecified

**Value:** code="296.8" Bipolar disorder NOS

**Value:** code="301.7" Antisocial personality disorder

**Value:** code="303.9" Alcohol dependence

**Value:** code="304" Opioid dependence

**Value:** code="304.1" Sedative, hypnotic, or anxiolytic dependence

**Value:** code="304.2" Cocaine dependence

**Value:** code="304.3" Cannabis dependence  
**Value:** code="304.4" Amphetamine or similarly acting sympathomimetic dependence  
**Value:** code="304.5" Hallucinogen dependence  
**Value:** code="304.8" Polysubstance dependence  
**Value:** code="305" Alcohol abuse  
**Value:** code="305.2" Cannabis abuse  
**Value:** code="305.3" Hallucinogen abuse  
**Value:** code="305.4" Sedative, hypnotic, or anxiolytic abuse  
**Value:** code="305.5" Opioid abuse  
**Value:** code="305.6" Cocaine abuse  
**Value:** code="305.7" Amphetamine abuse  
**Value:** code="305.9" Caffeine intoxication  
**Value:** code="311" Depressive disorder NOS  
**Value:** code="312.31" Pathological gambling  
**Value:** code="314" Attention-deficit/hyperactivity disorder, predominantly inattentive

type

**Value:** code="317" Mild mental retardation  
**Value:** code="296.3X" Major depressive disorder recurrent  
**Value:** code="296.74C" Bipolar I disorder with psychosis (Incongruent)  
**Value:** code="304.90A" Polysubstance dependence  
**Value:** code="305.50A" Opioid abuse  
**Value:** code="305.70B" Amphetamine or similarly acting sympathomimetic abuse  
**Value:** code="305.90A" Phencyclidine (PCP) or similarly acting arylcyclohexylamine abuse  
**Value:** code="312.39A" Trichotillomania  
**Value:** code="315.31A" Developmental expressive language disorder



## SumCritA

| Selected attribute |          |                |
|--------------------|----------|----------------|
| Name: SumCritA     |          | Type: Nominal  |
| Missing: 0 (0%)    |          | Distinct: 8    |
|                    |          | Unique: 0 (0%) |
| No.                | Label    | Count          |
| 1                  | 7.0      | 829            |
| 2                  | 5.0      | 981            |
| 3                  | 6.0      | 990            |
| 4                  | 2.0      | 93             |
| 5                  | 4.0      | 770            |
| 6                  | 3.0      | 378            |
| 7                  | 0.0      | 140            |
| 8                  | SumCritA | 2              |

No class Visualize All

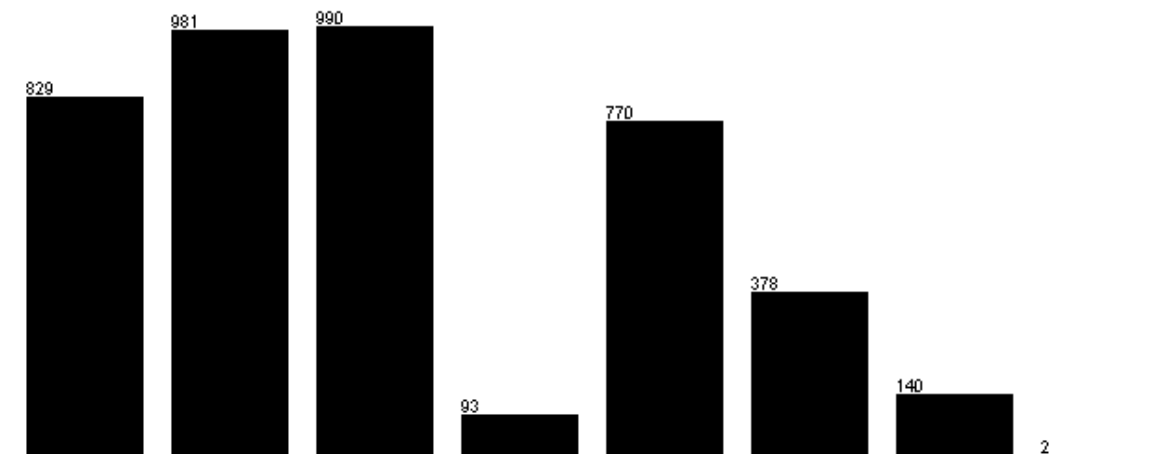

**Variable id**="phv00071362.v1"

**Description:**The total of items cs\_A1 through A5 - note that bizarre delusions (A1a) and voices commenting or conversing (A2a) count as an extra "point", so that a sum of 2 indicates that Criterion A has been met (e.g., for bizarre delusions, one would get 1 for A1 and 1 for A1a, totaling 2) - NOTE: by definition, all subjects with schizophrenia or schizoaffective disorder diagnoses were judged as meeting DSM-IV criteria B-F for schizophrenia. Number of criteria present

**Value:** code="0" Sum of cs\_A1, cs\_A1a, cs\_A2, cs\_A2a, cs\_A3, cs\_A4, and cs\_A5 equals 0

**Value:** code="1" Sum of cs\_A1, cs\_A1a, cs\_A2, cs\_A2a, cs\_A3, cs\_A4, and cs\_A5 equals 1

**Value:** code="2" Sum of cs\_A1, cs\_A1a, cs\_A2, cs\_A2a, cs\_A3, cs\_A4, and cs\_A5 equals 2

**Value:** code="3" Sum of cs\_A1, cs\_A1a, cs\_A2, cs\_A2a, cs\_A3, cs\_A4, and cs\_A5 equals 3  
**Value:** code="4" Sum of cs\_A1, cs\_A1a, cs\_A2, cs\_A2a, cs\_A3, cs\_A4, and cs\_A5 equals 4  
**Value:** code="5" Sum of cs\_A1, cs\_A1a, cs\_A2, cs\_A2a, cs\_A3, cs\_A4, and cs\_A5 equals 5  
**Value:** code="6" Sum of cs\_A1, cs\_A1a, cs\_A2, cs\_A2a, cs\_A3, cs\_A4, and cs\_A5 equals 6  
**Value:** code="7" Sum of cs\_A1, cs\_A1a, cs\_A2, cs\_A2a, cs\_A3, cs\_A4, and cs\_A5 equals 7

## Cs\_A1

| Selected attribute |       |                |
|--------------------|-------|----------------|
| Name: cs_A1        |       | Type: Nominal  |
| Missing: 140 (3%)  |       | Distinct: 3    |
|                    |       | Unique: 0 (0%) |
| No.                | Label | Count          |
| 1                  | 1.0   | 3982           |
| 2                  | 0.0   | 59             |
| 3                  | cs_A1 | 2              |

No class Visualize All

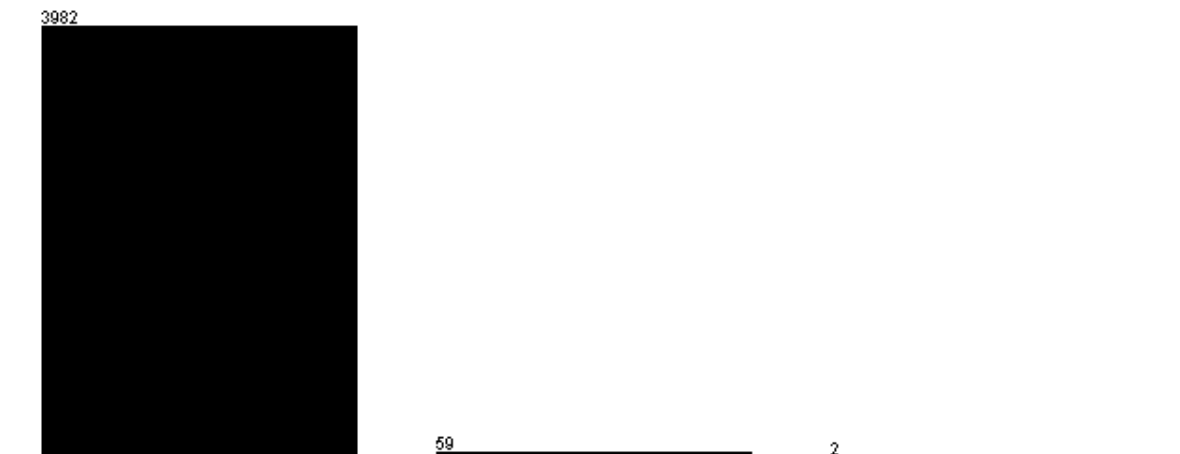

**Variable id**="phv00071363.v1"

**Description:**Consensus rating for DSM-IV schizophrenia criterion A1 (delusions)

**Comentarios:**Consensus diagnostician rates each DSM-IV criterion for schizophrenia as present or absent based on agreement of two independent diagnosticians or discuss of consensus

**Value:** code="0" Absent

**Value:** code="1" Present

## cs\_A1a

| Selected attribute |        |                |
|--------------------|--------|----------------|
| Name: cs_A1a       |        | Type: Nominal  |
| Missing: 178 (4%)  |        | Distinct: 3    |
|                    |        | Unique: 0 (0%) |
| No.                | Label  | Count          |
| 1                  | 1.0    | 2530           |
| 2                  | 0.0    | 1473           |
| 3                  | cs_A1a | 2              |

No class Visualize All

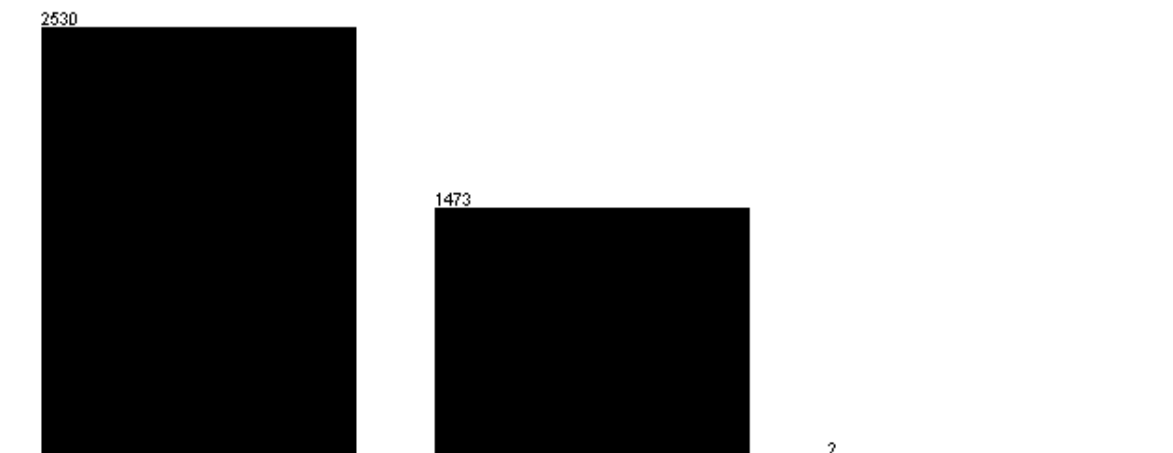

**Variable id="phv00071364.v1"**

**Description:**Consensus rating for presence of bizarre delusions as defined in DSM-IV (implausible, impossible, including Schneiderian delusions)

**Comentarios:**Consensus diagnostician rates each DSM-IV criterion for schizophrenia as present or absent based on agreement of two independent diagnosticians or discuss of consensus

**Value:** code="0" Absent

**Value:** code="1" Present

## Cs\_A2

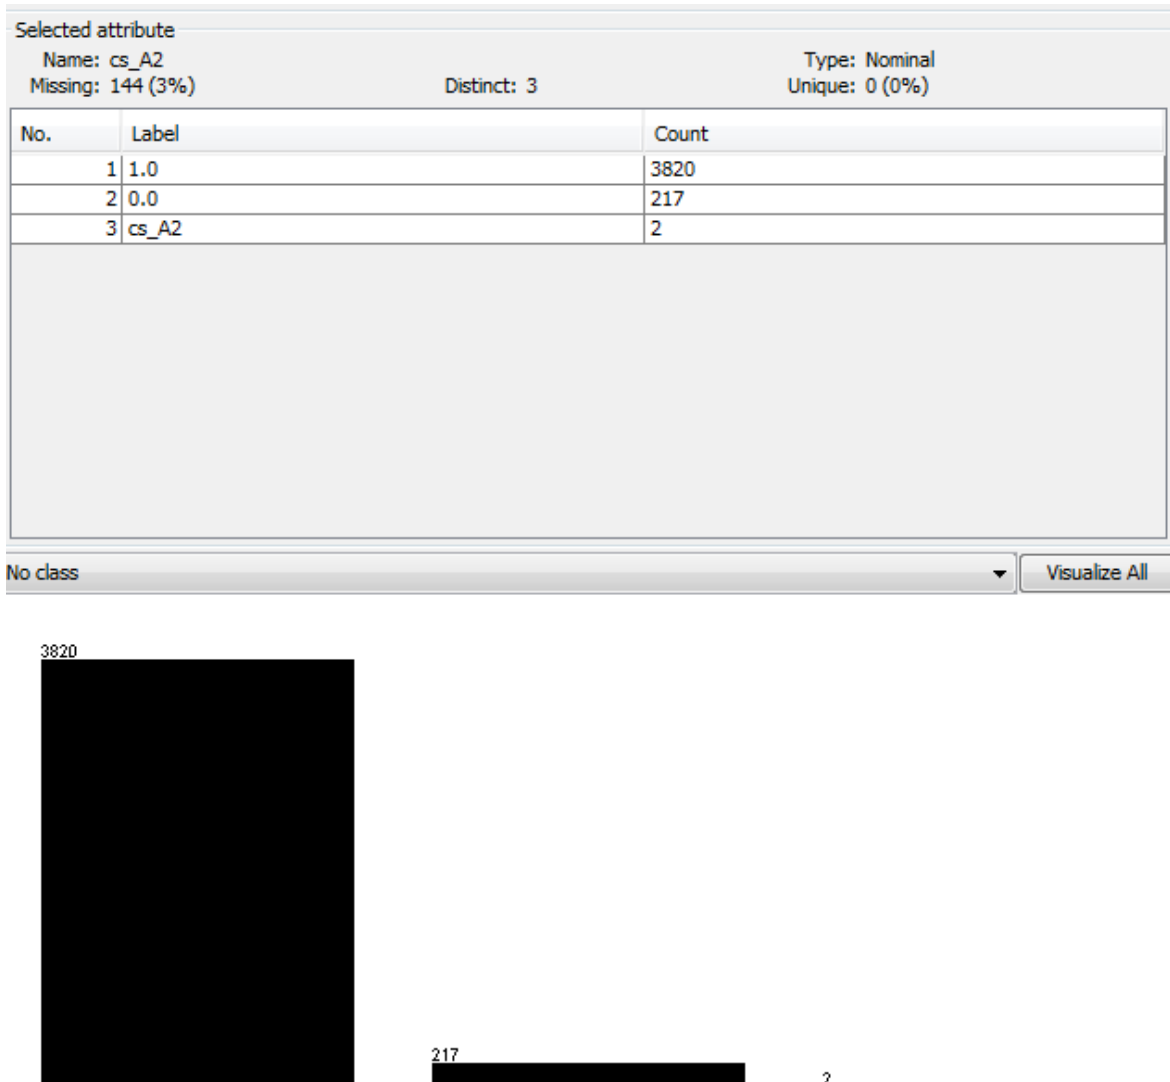

**Variable id="phv00071365.v1"**

**Description:**Consensus rating for DSM-IV schizophrenia criterion A2 (hallucinations)

**Comentarios:**Consensus diagnostician rates each DSM-IV criterion for schizophrenia as present or absent based on agreement of two independent diagnosticians or discuss of consensus

**Value:** code="0" Absent

**Value:** code="1" Present

## cs\_A2a

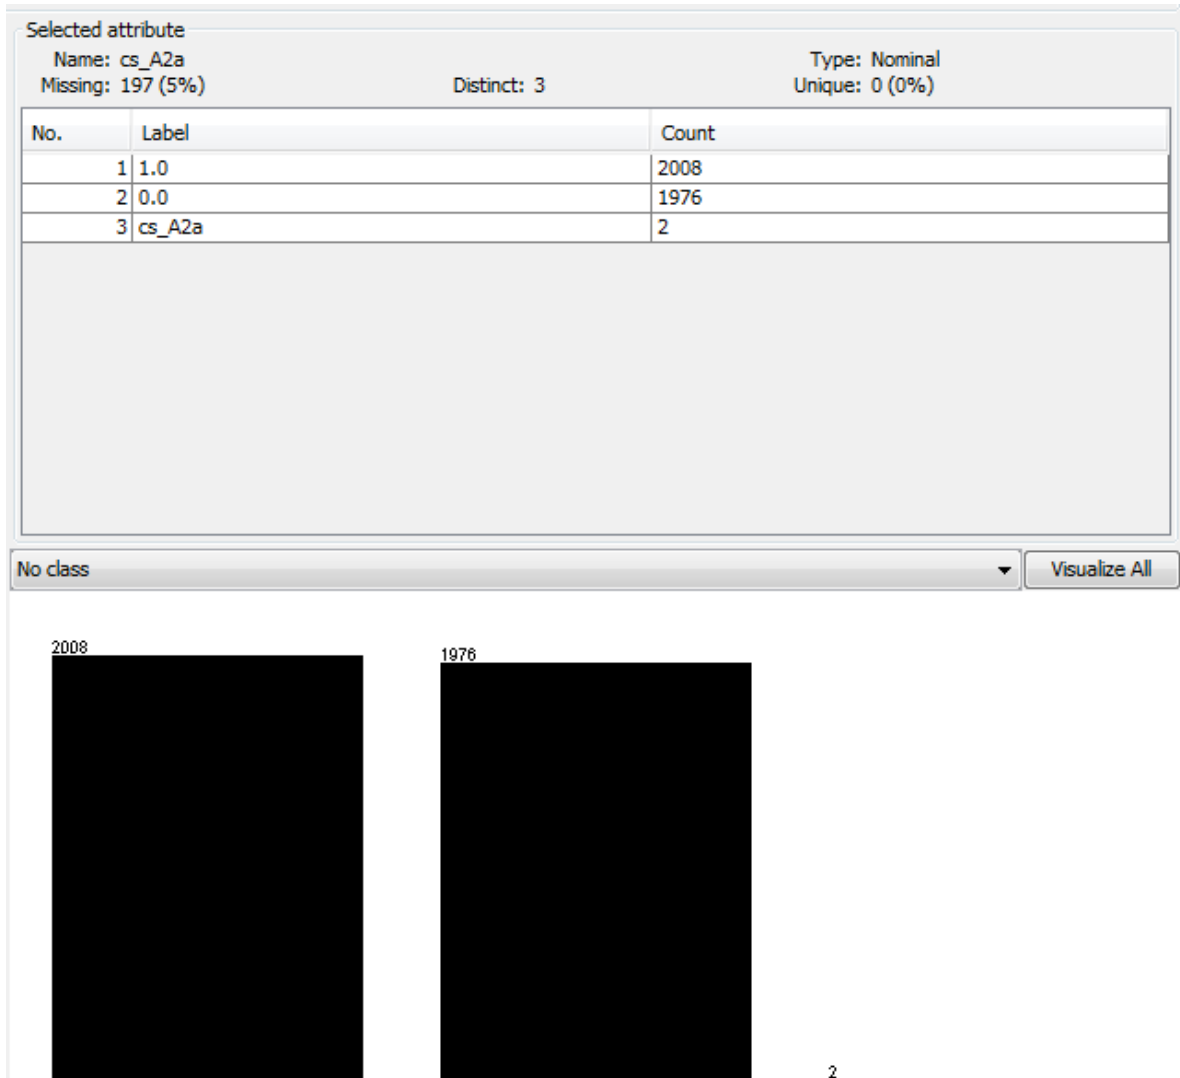

**Variable id="phv00071366.v1"**

**Description:**Consensus rating for presence of auditory hallucinations consisting of voices that converse with each other and/or comment on the subject's thoughts or behavior

**Comentarios:**Consensus diagnostician rates each DSM-IV criterion for schizophrenia as present or absent based on agreement of two independent diagnosticians or discuss of consensus

**Value:** code="0" Absent

**Value:** code="1" Present

## Cs\_A3

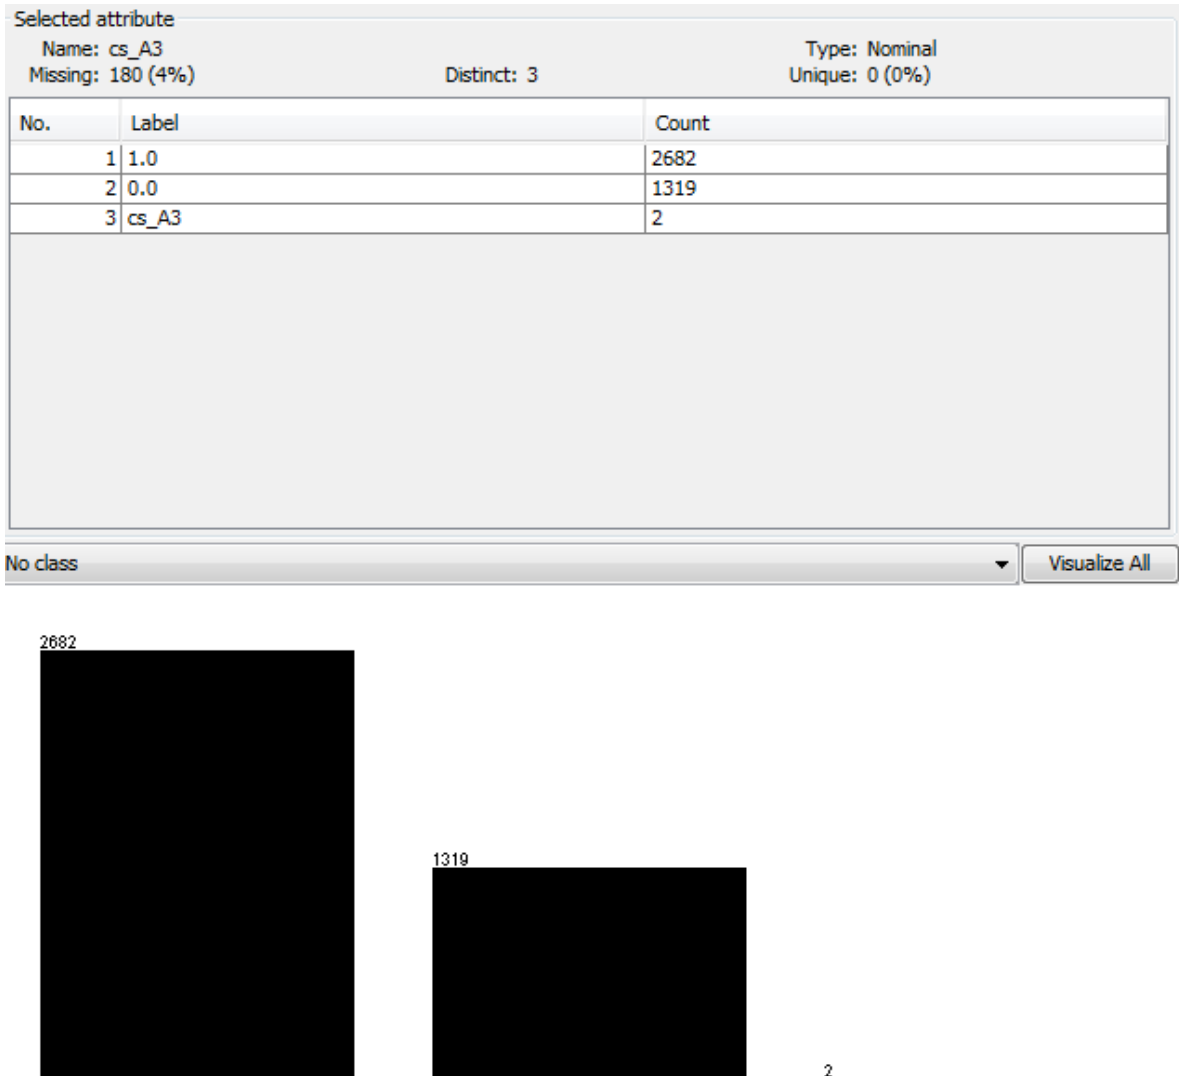

**Variable id**="phv00071367.v1"

**Description:**Consensus rating for DSM-IV schizophrenia criterion A3 (disorganized speech - frequent derailment or incoherence)

**Comentarios:**Consensus diagnostician rates each DSM-IV criterion for schizophrenia as present or absent based on agreement of two independent diagnosticians or discuss of consensus

**Value:** code="0" Absent

**Value:** code="1" Present

## Cs\_A4

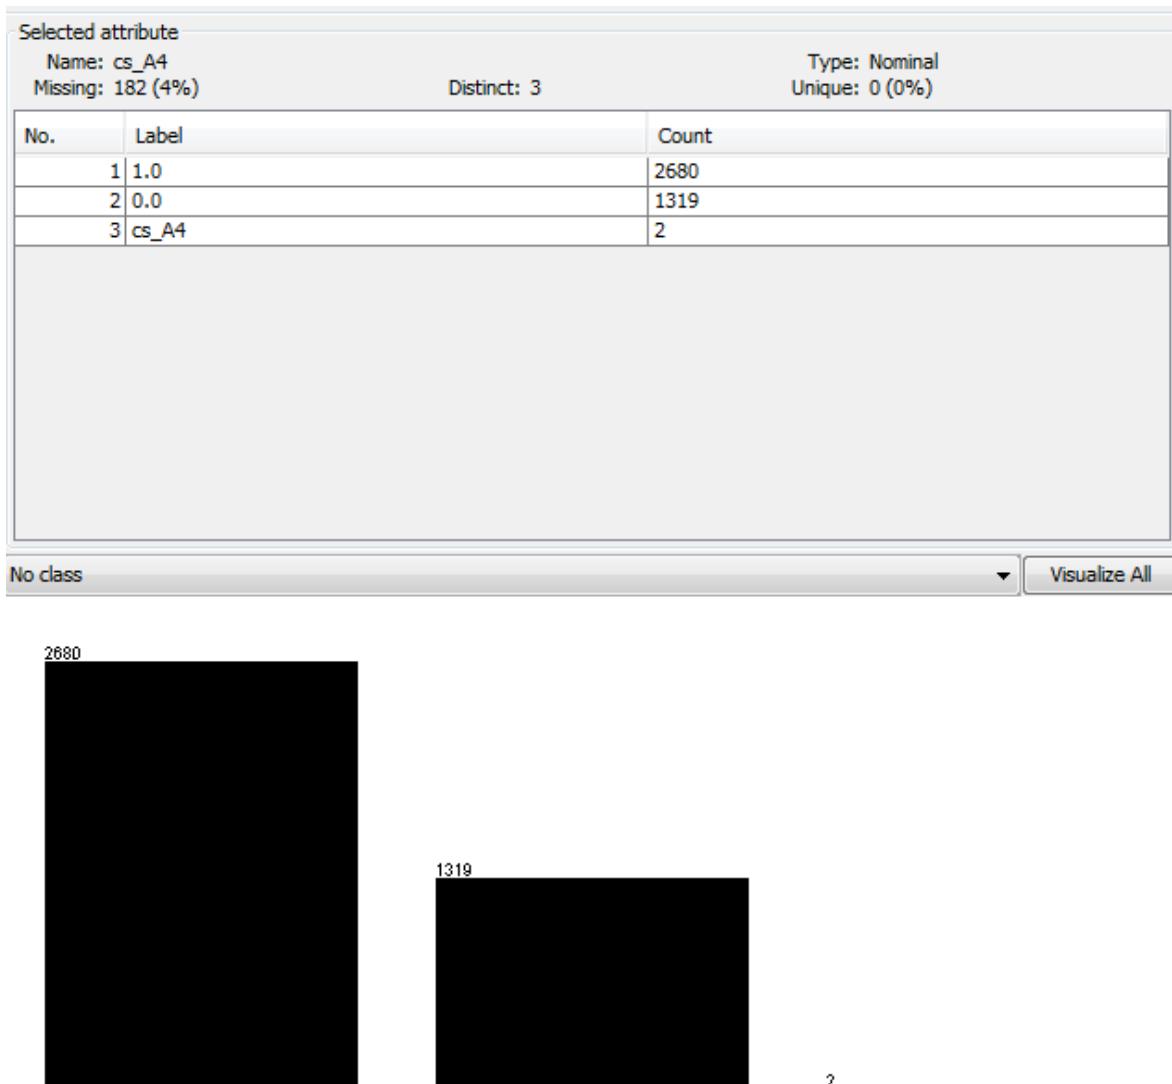

**Variable id**="phv00071368.v1"

**Description:**Consensus rating for DSM-IV schizophrenia criterion A4 (grossly disorganized or catatonic behavior)

**Comentarios:**Consensus diagnostician rates each DSM-IV criterion for schizophrenia as present or absent based on agreement of two independent diagnosticians or discuss of consensus

**Value:** code="0" Absent

**Value:** code="1" Present



## Cs\_A5

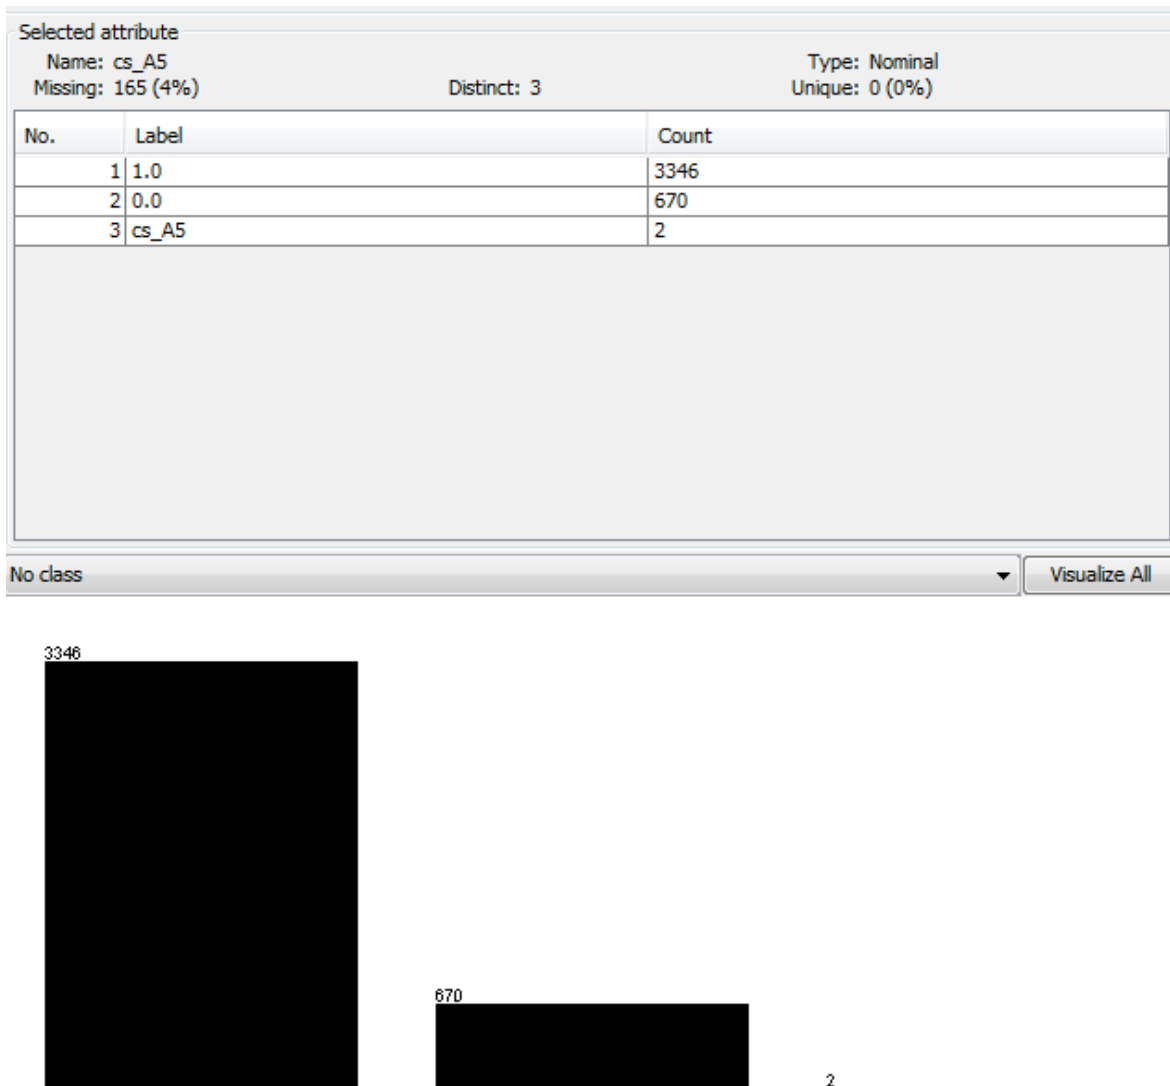

**Variable id**="phv00071369.v1"

**Description:**Consensus rating for DSM-IV schizophrenia criterion A rating A1 (negative symptom - affective flattening, avolition, alogia)

**Comentarios:**Consensus diagnostician rates each DSM-IV criterion for schizophrenia as present or absent based on agreement of two independent diagnosticians or discuss of consensus

**Value:** code="0" Absent

**Value:** code="1" Present

## MonthsIll

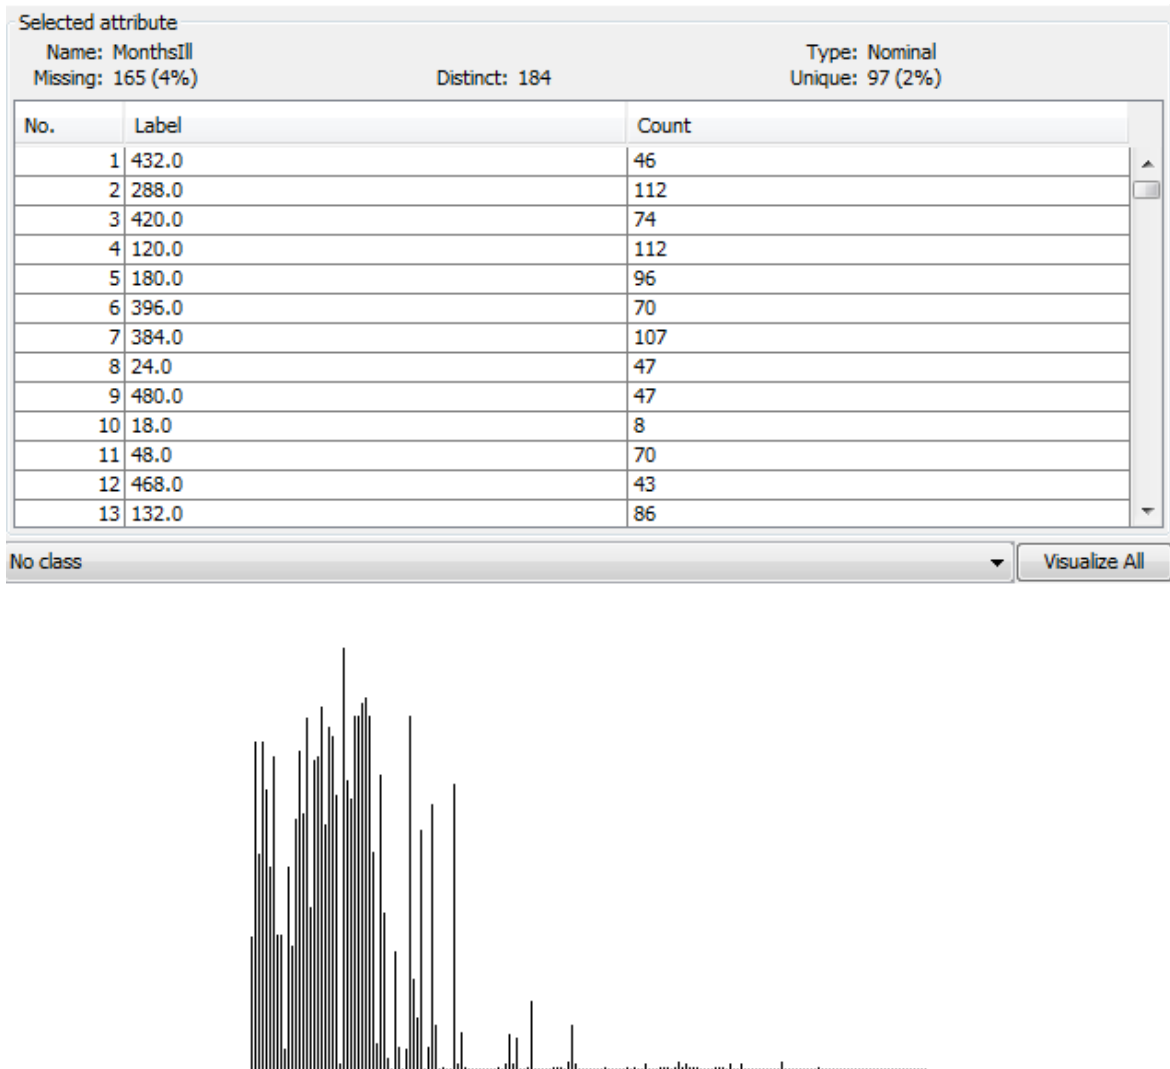

**Variable id**="phv00071370.v1"

**Description:** Consensus estimate of the lifetime total of months that the subject has had active residual schizophrenia (or schizoaffective disorder)

**Value:** code="U" Unknown (could not rate)

**Value:** code="u" Unknown (could not rate)

## MonthsMood

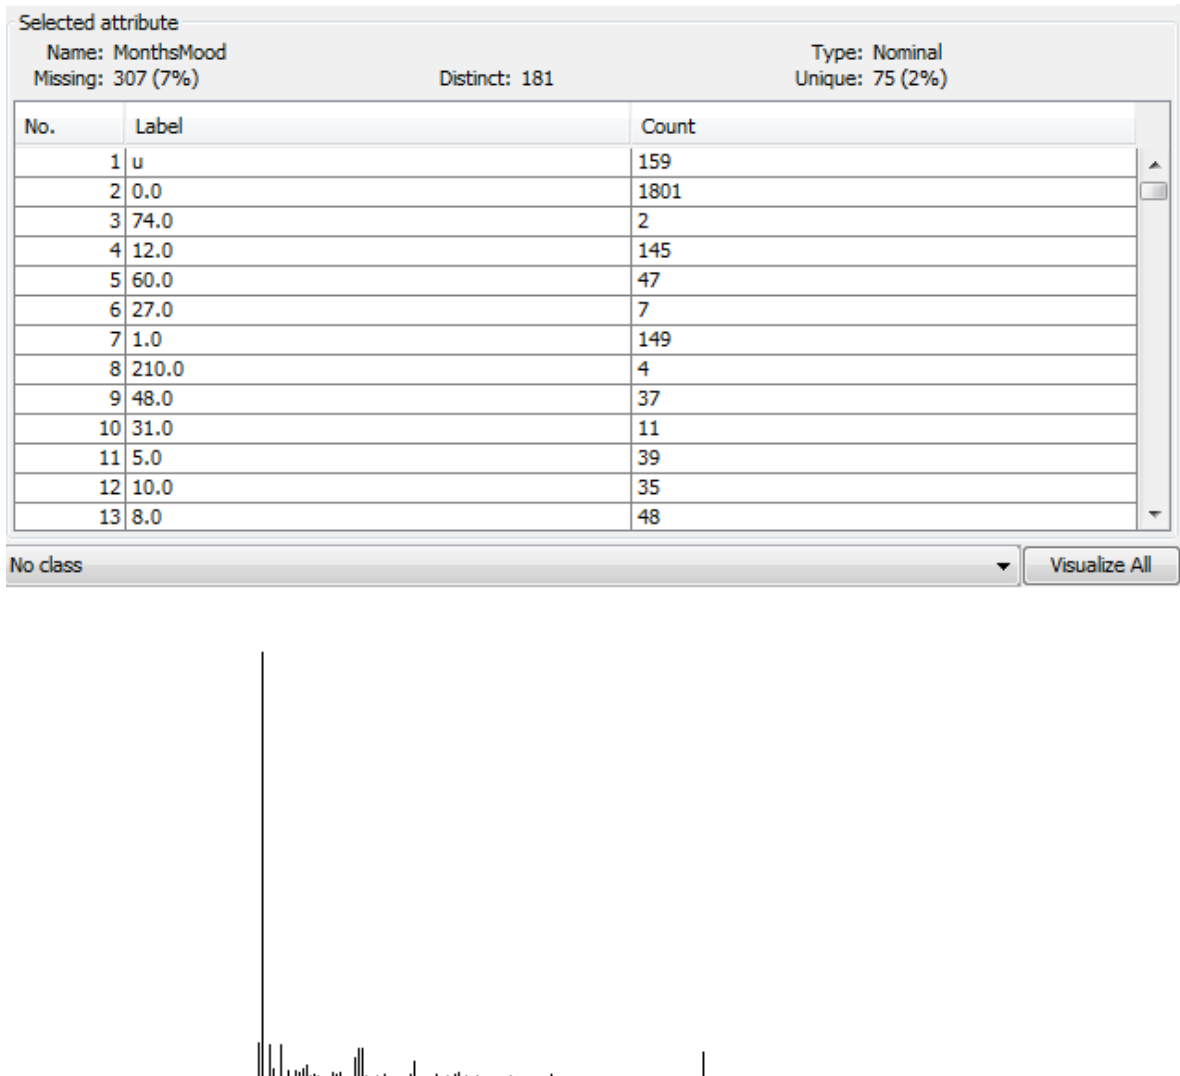

**Variable id**="phv00071371.v1"

**Description:**Consensus estimate of the lifetime total of months that the subject has had full mood syndromes (mania or depression) - note, ratio of MonthsMood/MonthsIll required to be more or equivalent to 0.3 to diagnose schizoaffective disorder

**Value:** code="u" Unknown (could not rate)

## Auditory\_Halns\_Ever

Selected attribute

Name: Auditory\_Halns\_Ever[I10920]      Type: Nominal  
Missing: 145 (3%)      Distinct: 5      Unique: 0 (0%)

| No. | Label                       | Count |
|-----|-----------------------------|-------|
| 1   | 1.0                         | 3243  |
| 2   | 0.0                         | 464   |
| 3   | 2.0                         | 251   |
| 4   | 3.0                         | 78    |
| 5   | Auditory_Halns_Ever[I10920] | 2     |

No class Visualize All

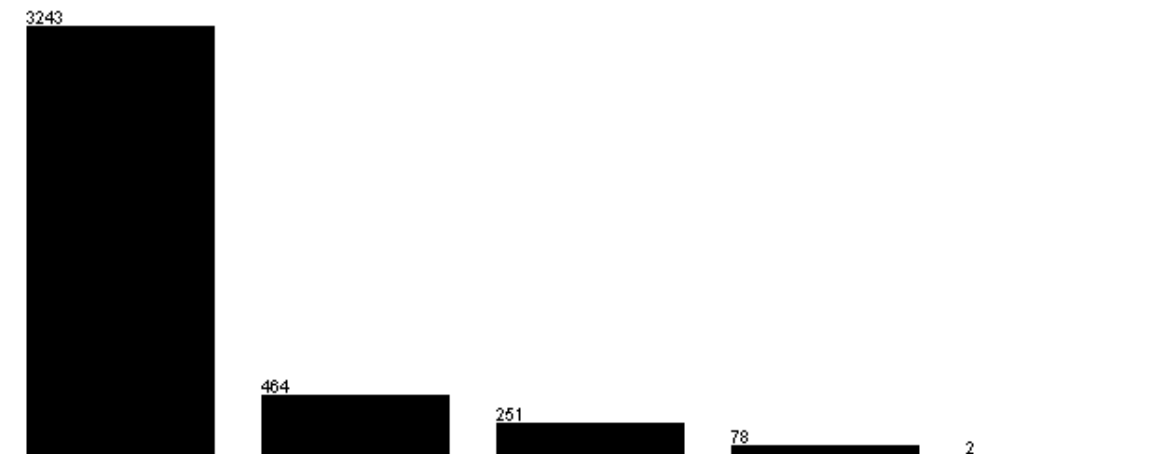

**Variable id**="phv00071372.v1"

**Description:** Auditory\_Hallucinations Ever (when psychotic and without other comorbid features present), followed by the raw repository SAS database field name in brackets for cross-reference to repository database [I10920]. Rating

**Value:** code="0" Absent

**Value:** code="1" Present

**Value:** code="2" Suspected

**Value:** code="3" Unknown (could not rate)

## Visual\_Halns\_Ever

Selected attribute

|                                 |             |                |
|---------------------------------|-------------|----------------|
| Name: Visual_Halns_Ever[I10930] | Distinct: 5 | Type: Nominal  |
| Missing: 151 (4%)               |             | Unique: 0 (0%) |

| No. | Label                     | Count |
|-----|---------------------------|-------|
| 1   | 0.0                       | 1421  |
| 2   | 1.0                       | 2210  |
| 3   | 2.0                       | 183   |
| 4   | 3.0                       | 216   |
| 5   | Visual_Halns_Ever[I10930] | 2     |

No class Visualize All

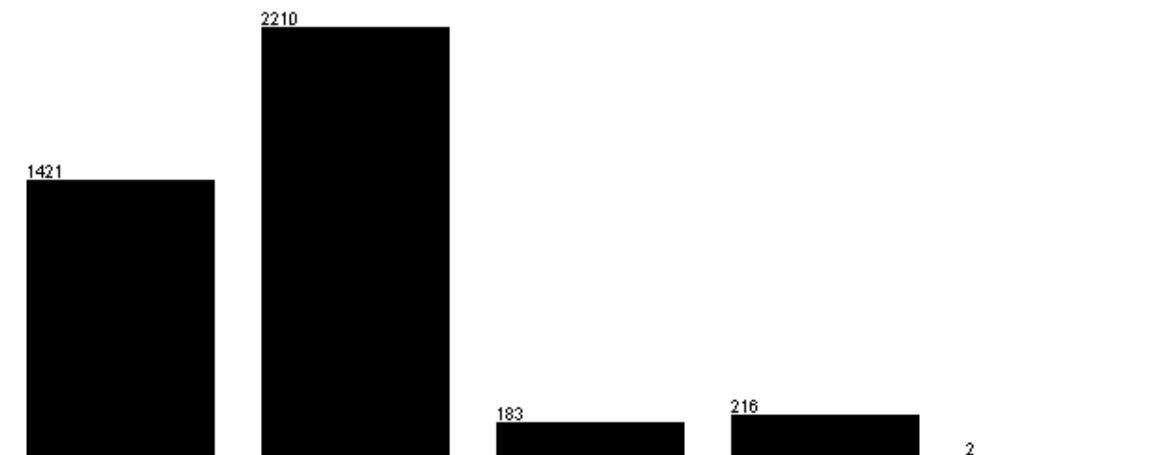

**Variable id**="phv00071373.v1"

**Description:** Visual\_Hallucinations Ever (when psychotic and without other comorbid features present), followed by the raw repository SAS database field name in brackets for cross-reference to repository database [I10930]. Rating

**Value:** code="0" Absent

**Value:** code="1" Present

**Value:** code="2" Suspected

**Value:** code="3" Unknown (could not rate)

## Delusions\_Ever

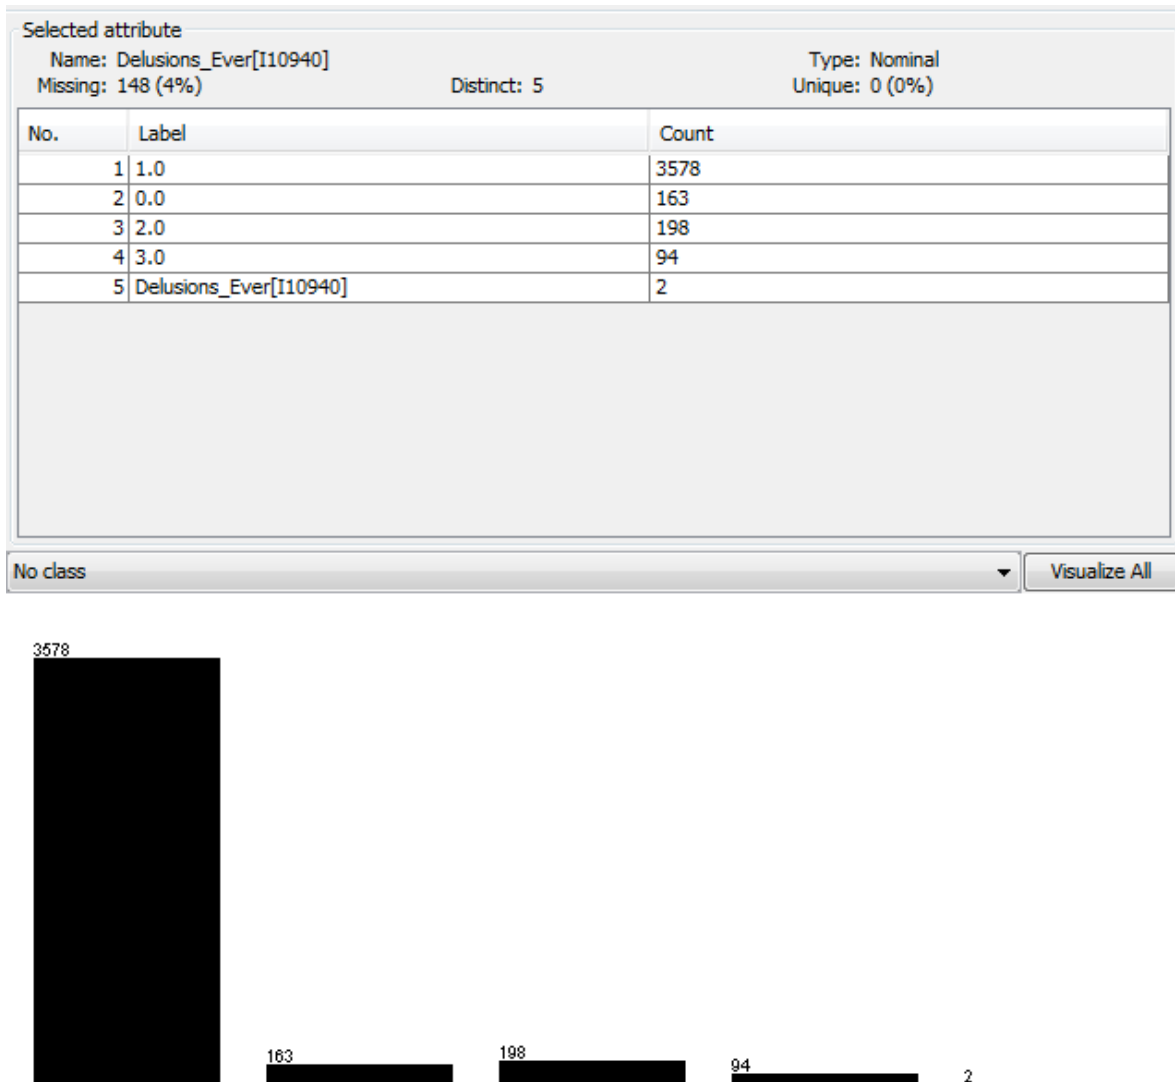

**Variable id**="phv00071374.v1"

**Description:**Delusions Ever (when psychotic and without other comorbid features present), followed by the raw repository SAS database field name in brackets for cross-reference to repository database [I10940]. Rating

**Value:** code="0" Absent

**Value:** code="1" Present

**Value:** code="2" Suspected

**Value:** code="3" Unknown (could not rate)

## Current\_Psychosis

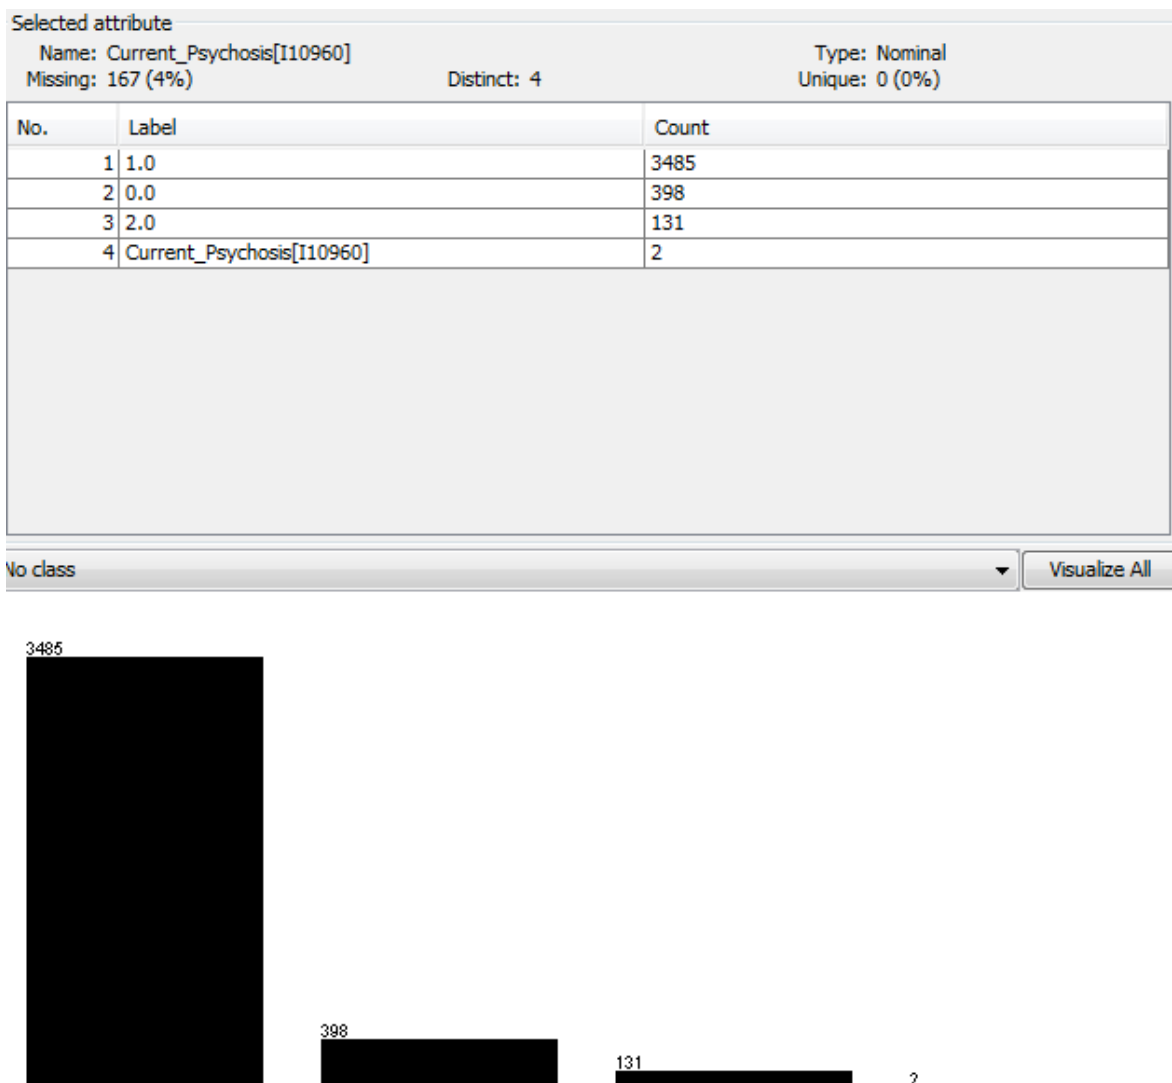

**Variable id="phv00071375.v1"**

**Description:** Current psychosis (when psychotic and without other comorbid features present), followed by the raw repository SAS database field name in brackets for cross-reference to repository database [I10960]. Rating

**Value:** code="0" Absent

**Value:** code="1" Present

**Value:** code="2" Suspected

**Value:** code="3" Unknown (could not rate)

## Current\_Psychosis\_Duration\_Weeks

Selected attribute

Name: Current\_Psychosis\_Duration\_Weeks[I10990]      Type: Nominal  
Missing: 688 (16%)      Distinct: 143      Unique: 75 (2%)

| No. | Label | Count |
|-----|-------|-------|
| 1   | 999.0 | 1956  |
| 2   | 468.0 | 65    |
| 3   | 780.0 | 84    |
| 4   | 104.0 | 43    |
| 5   | 208.0 | 49    |
| 6   | 988.0 | 50    |
| 7   | u     | 91    |
| 8   | 260.0 | 68    |
| 9   | 728.0 | 67    |
| 10  | 572.0 | 57    |
| 11  | 26.0  | 5     |
| 12  | 520.0 | 97    |
| 13  | 364.0 | 66    |

No class      Visualize All

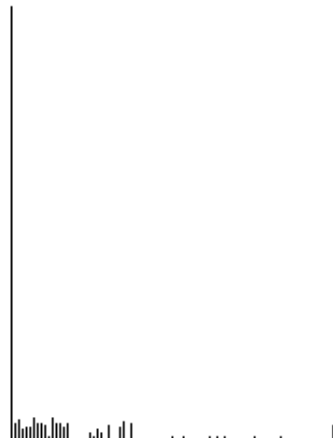

**Variable id**="phv00071376.v1"

**Description:**Current psychosis, duration weeks (when psychotic and without other comorbid features present), followed by the raw repository SAS database field name in brackets for cross-reference to repository database [I10990]

**Value:** code="999" 999 weeks or more

**Value:** code="u" Unknown (could not rate)

## Persecutory\_Delusions



| Selected attribute                  |                               |                |
|-------------------------------------|-------------------------------|----------------|
| Name: Persecutory_Delusions[I11030] |                               | Type: Nominal  |
| Missing: 211 (5%)                   |                               | Distinct: 4    |
|                                     |                               | Unique: 0 (0%) |
| No.                                 | Label                         | Count          |
| 1                                   | 1.0                           | 3026           |
| 2                                   | 2.0                           | 259            |
| 3                                   | 0.0                           | 685            |
| 4                                   | Persecutory_Delusions[I11030] | 2              |

No class Visualize All

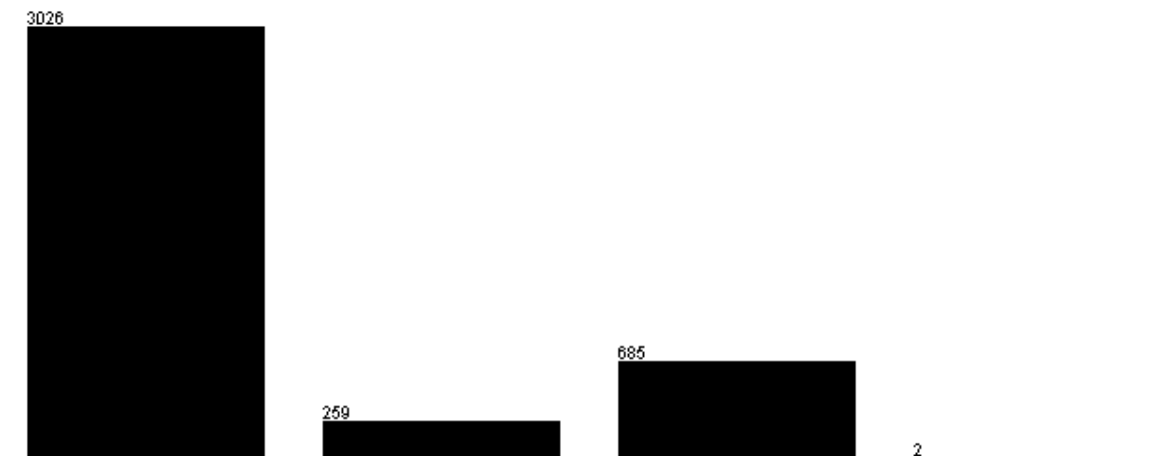

**Variable id**="phv00071377.v1"

**Description:**Persecutory Delusions (when psychotic and without other comorbid features present), followed by the raw repository SAS database field name in brackets for cross-reference to repository database [I11030]. Rating

**Value:** code="0" Absent

**Value:** code="1" Present

**Value:** code="2" Unknown (could not rate)

## Jealousy\_Delusions

Selected attribute

Name: Jealousy\_Delusions[I11110]      Type: Nominal  
Missing: 227 (5%)      Distinct: 4      Unique: 0 (0%)

| No. | Label                      | Count |
|-----|----------------------------|-------|
| 1   | 0.0                        | 3056  |
| 2   | 1.0                        | 572   |
| 3   | 2.0                        | 326   |
| 4   | Jealousy_Delusions[I11110] | 2     |

No class Visualize All

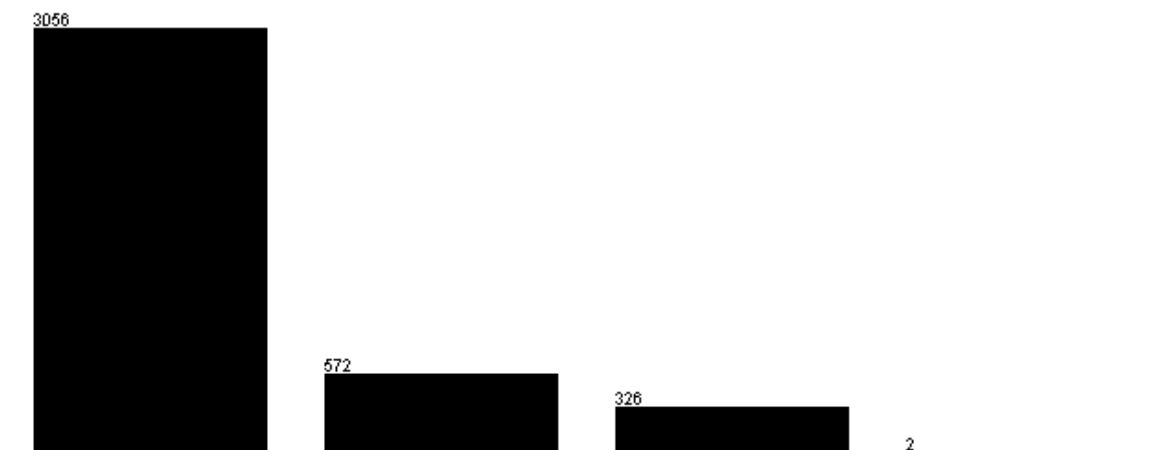

**Variable id**="phv00071378.v1"

**Description:**Jealousy Delusions (when psychotic and without other comorbid features present), followed by the raw repository SAS database field name in brackets for cross-reference to repository database [I11110]. Rating

**Value:** code="0" Absent

**Value:** code="1" Present

**Value:** code="2" Unknown (could not rate)

## Guilt\_Sin\_Delusions

Selected attribute

|                                   |             |                |
|-----------------------------------|-------------|----------------|
| Name: Guilt_Sin_Delusions[I11180] | Distinct: 4 | Type: Nominal  |
| Missing: 235 (6%)                 |             | Unique: 0 (0%) |

| No. | Label                       | Count |
|-----|-----------------------------|-------|
| 1   | 0.0                         | 2950  |
| 2   | 1.0                         | 670   |
| 3   | 2.0                         | 326   |
| 4   | Guilt_Sin_Delusions[I11180] | 2     |

No class Visualize All

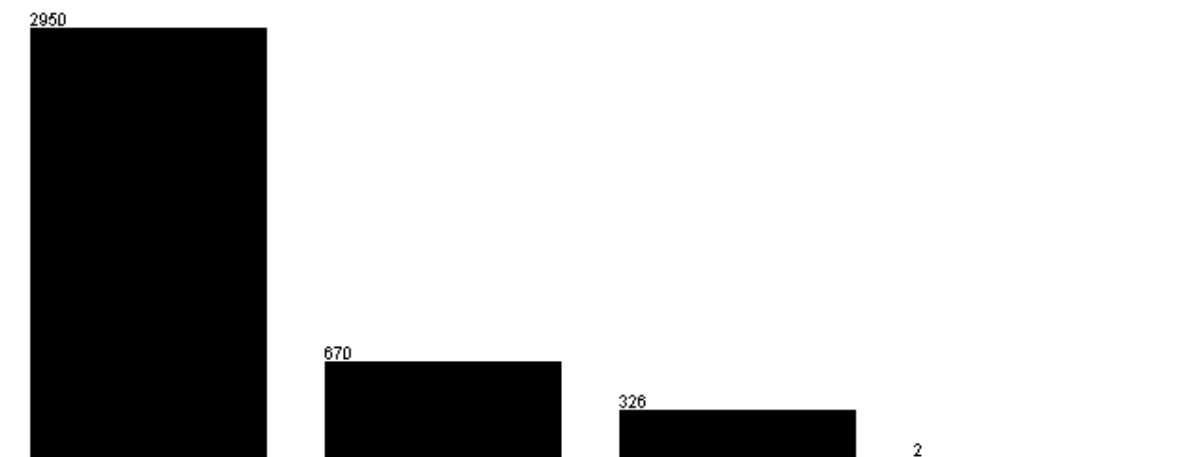

**Variable id**="phv00071379.v1"

**Description:** Guilt Sin Delusions (when psychotic and without other comorbid features present), followed by the raw repository SAS database field name in brackets for cross-reference to repository database [I11180]. Rating

**Value:** code="0" Absent

**Value:** code="1" Present

**Value:** code="2" Unknown (could not rate)

## Grandiose\_Delusions

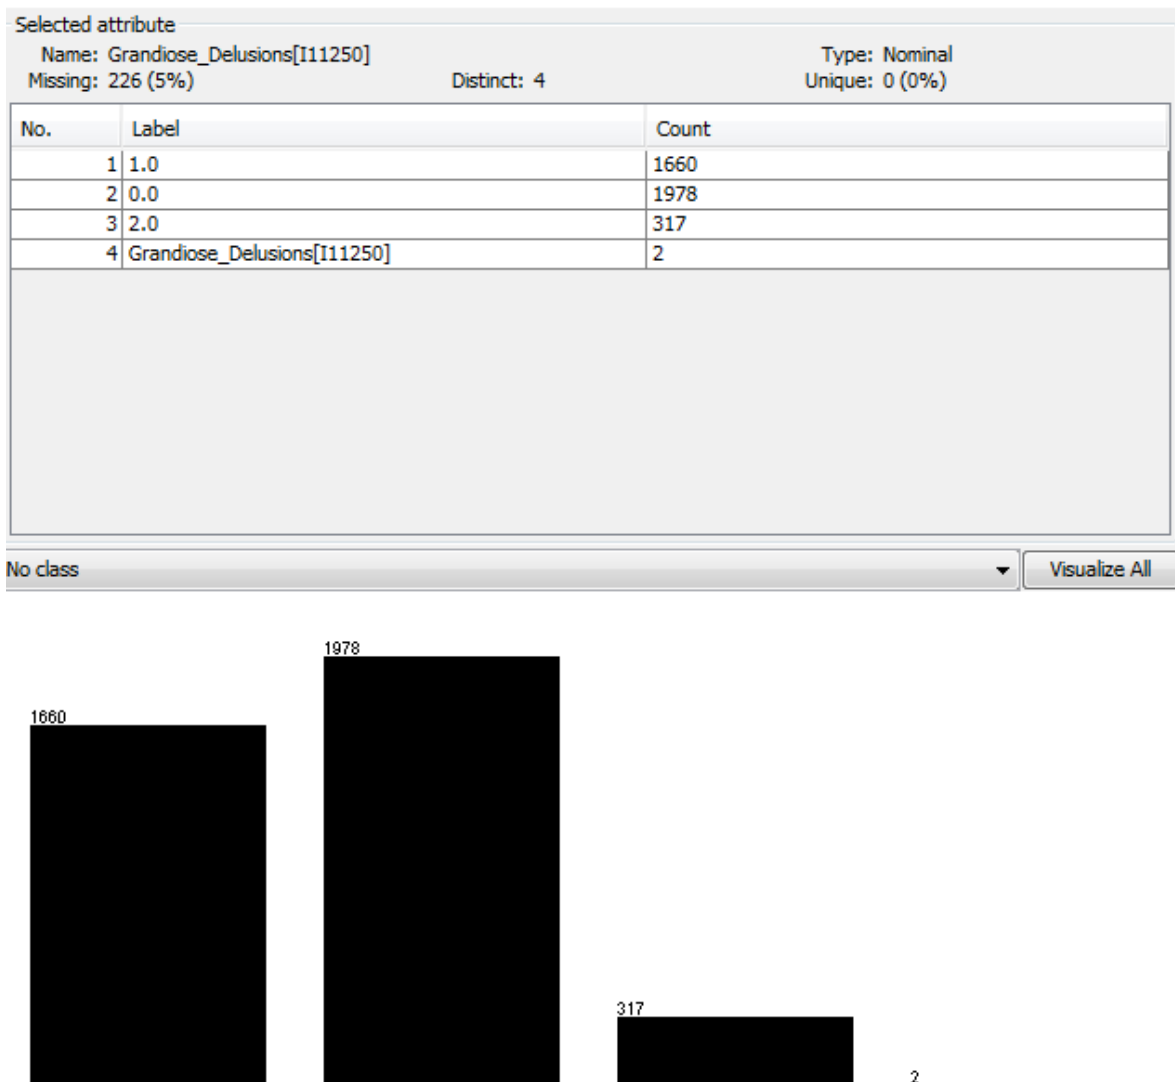

**Variable id**="phv00071380.v1"

**Description:**Grandiose Delusions (when psychotic and without other comorbid features present), followed by the raw repository SAS database field name in brackets for cross-reference to repository database [I11250]. Rating

**Value:** code="0" Absent

**Value:** code="1" Present

**Value:** code="2" Unknown (could not rate)

## Religious\_Delusions

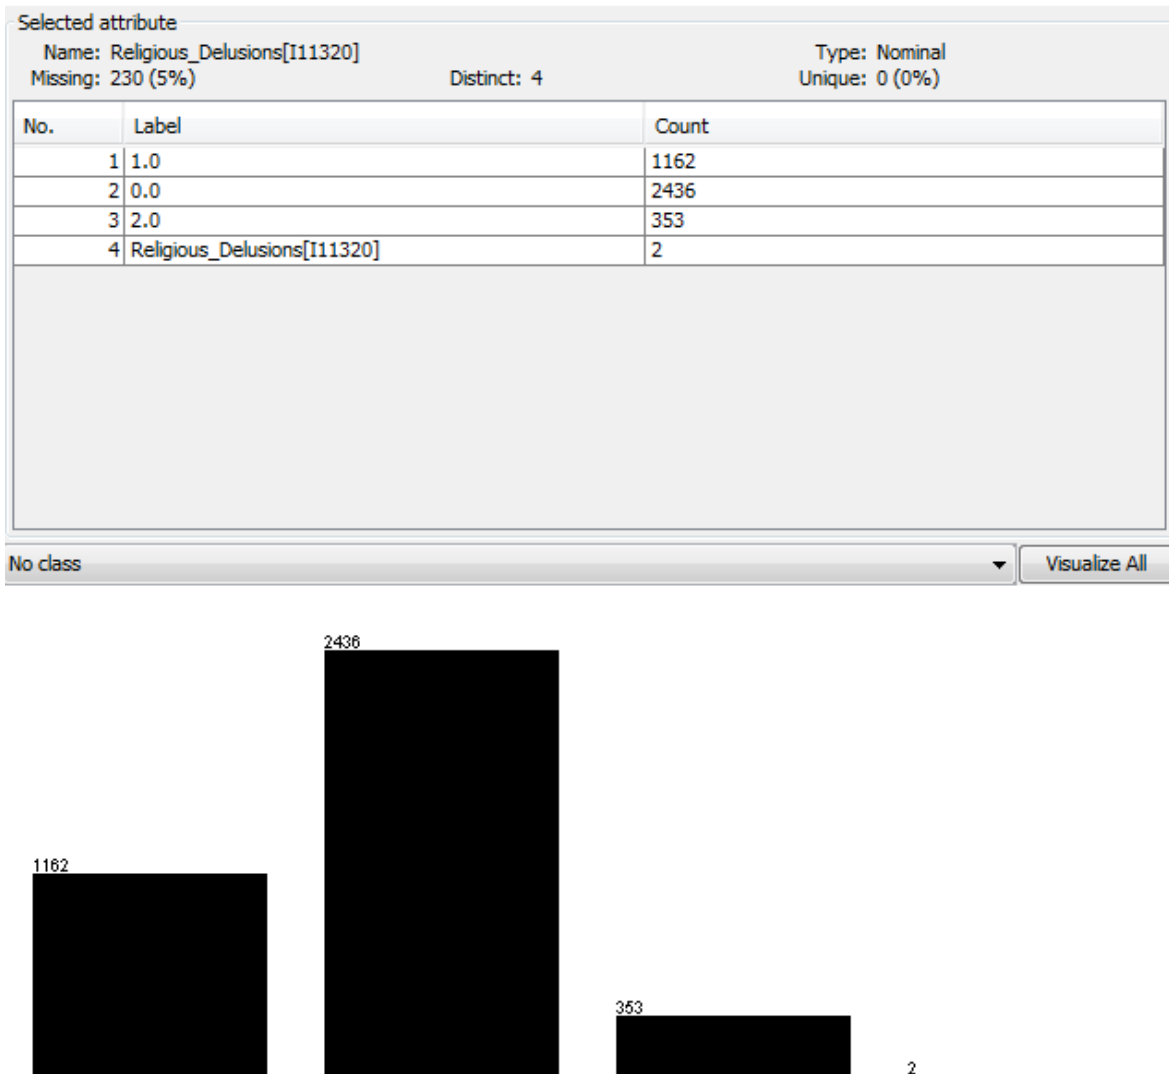

**Variable id="phv00071381.v1"**

**Description:** Religious Delusions (when psychotic and without other comorbid features present), followed by the raw repository SAS database field name in brackets for cross-reference to repository database [I11320]. Rating

**Value:** code="0" Absent

**Value:** code="1" Present

**Value:** code="2" Unknown (could not rate)

## Somatic\_Delusions

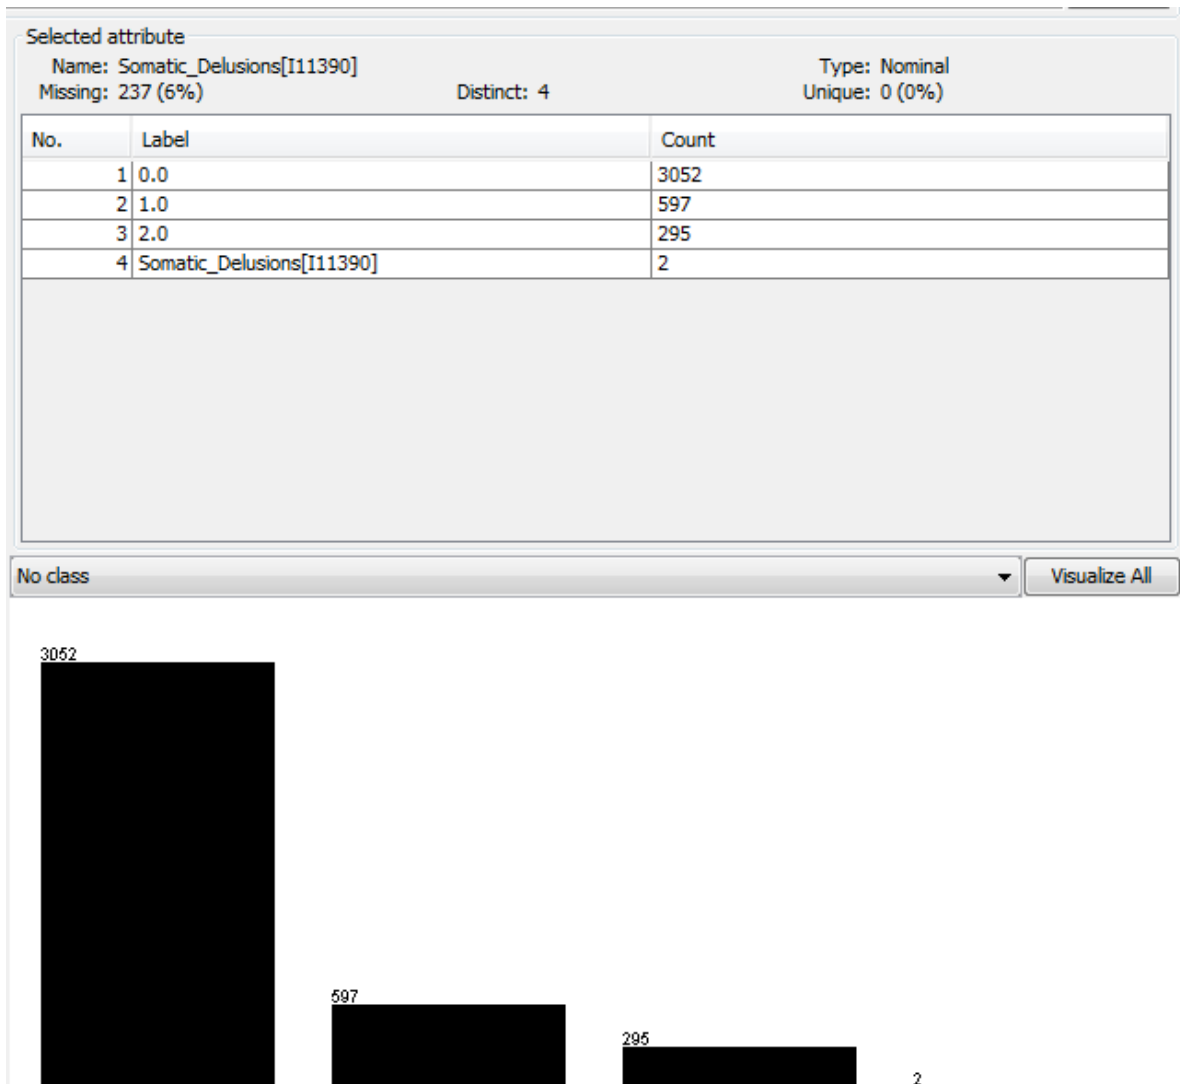

**Variable id**="phv00071382.v1"

**Description:** Somatic Delusions (when psychotic and without other comorbid features present), followed by the raw repository SAS database field name in brackets for cross-reference to repository database [I11390]. Rating

**Value:** code="0" Absent

**Value:** code="1" Present

**Value:** code="2" Unknown (could not rate)

## Del\_of\_Ref

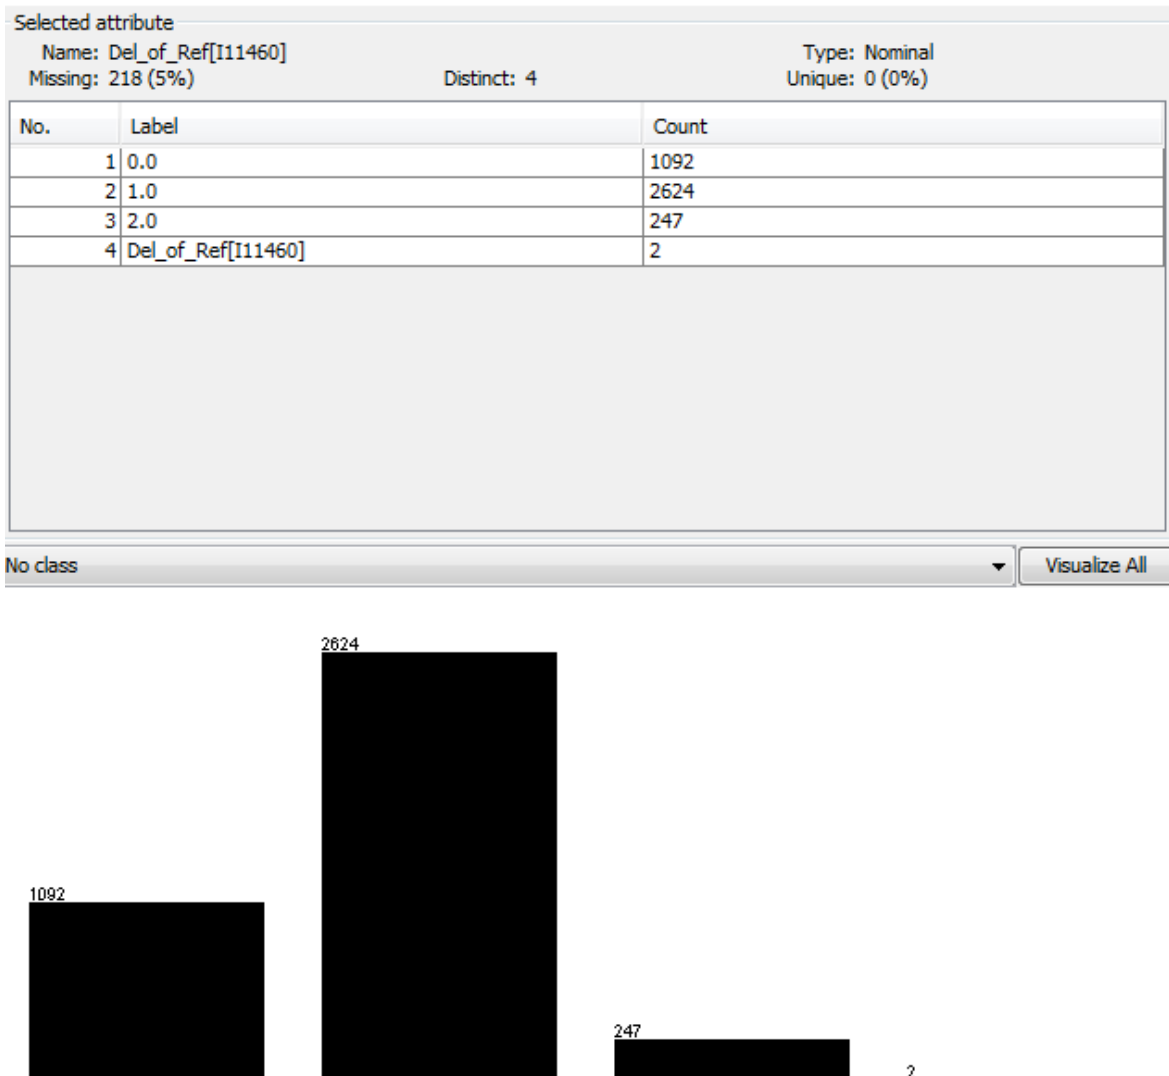

**Variable id**="phv00071383.v1"

**Description:**Delusions of Reference (when psychotic and without other comorbid features present), followed by the raw repository SAS database field name in brackets for cross-reference to repository database [I11460]. Rating

**Value:** code="0" Absent

**Value:** code="1" Present

**Value:** code="2" Unknown (could not rate)

## Being\_Controlled

Selected attribute

Name: Being\_Controlled[I11530]      Type: Nominal  
Missing: 225 (5%)      Distinct: 4      Unique: 0 (0%)

| No. | Label                    | Count |
|-----|--------------------------|-------|
| 1   | 0.0                      | 2567  |
| 2   | 1.0                      | 1036  |
| 3   | 2.0                      | 353   |
| 4   | Being_Controlled[I11530] | 2     |

No class Visualize All

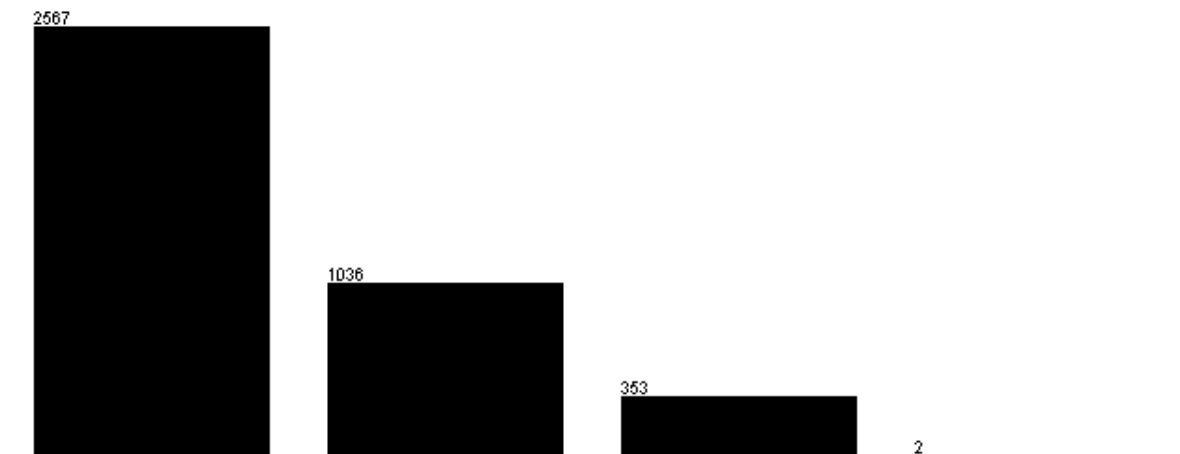

**Variable id**="phv00071384.v1"

**Description:**Delusions of thoughts or actions being controlled (when psychotic and without other comorbid features present), followed by the raw repository SAS database field name in brackets for cross-reference to repository database [I11530]. Rating

**Value:** code="0" Absent

**Value:** code="1" Present

**Value:** code="2" Unknown (could not rate)



## Del\_Mind\_Reading

| Selected attribute             |                          |                |
|--------------------------------|--------------------------|----------------|
| Name: Del_Mind_Reading[I11600] |                          | Type: Nominal  |
| Missing: 223 (5%)              |                          | Distinct: 4    |
|                                |                          | Unique: 0 (0%) |
| No.                            | Label                    | Count          |
| 1                              | 1.0                      | 1711           |
| 2                              | 0.0                      | 1946           |
| 3                              | 2.0                      | 301            |
| 4                              | Del_Mind_Reading[I11600] | 2              |

No class Visualize All

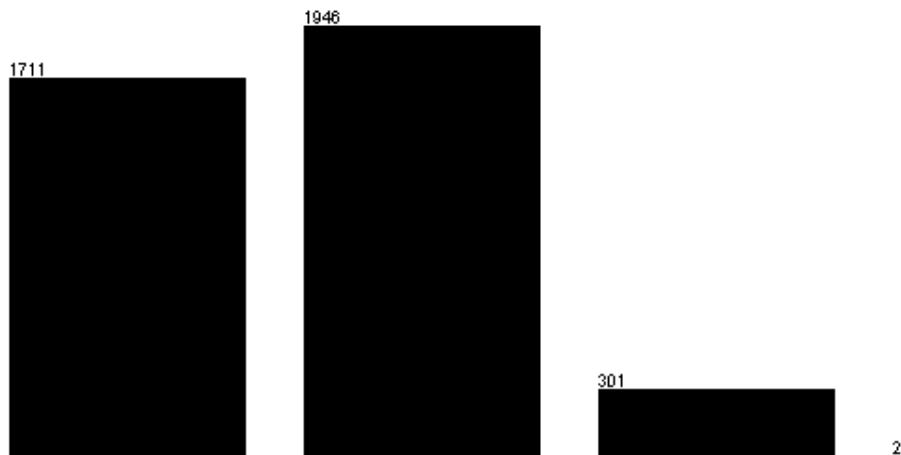

**Variable id**="phv00071385.v1"

**Description:**Delusions of mind being read (when psychotic and without other comorbid features present), followed by the raw repository SAS database field name in brackets for cross-reference to repository database [I11600]. Rating

**Value:** code="0" Absent

**Value:** code="1" Present

**Value:** code="2" Unknown (could not rate)

## Thought\_Broadcasting

Selected attribute

|                                    |             |                |
|------------------------------------|-------------|----------------|
| Name: Thought_Broadcasting[I11670] | Distinct: 4 | Type: Nominal  |
| Missing: 231 (6%)                  |             | Unique: 0 (0%) |

| No. | Label                        | Count |
|-----|------------------------------|-------|
| 1   | 0.0                          | 2511  |
| 2   | 1.0                          | 1085  |
| 3   | 2.0                          | 354   |
| 4   | Thought_Broadcasting[I11670] | 2     |

No class Visualize All

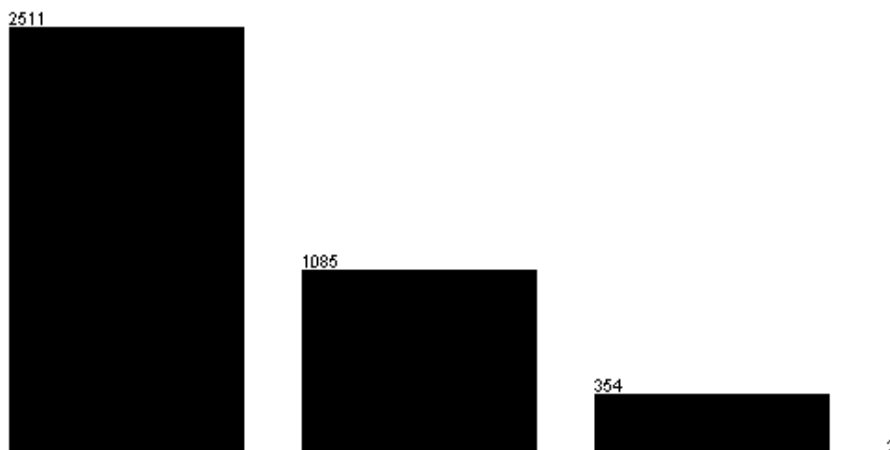

**Variable id**="phv00071386.v1"

**Description:**Delusion of thoughtst (nonbizarre delusion) being broadcast out loud (when psychotic and without other comorbid features present), followed by the raw repository SAS database field name in brackets for cross-reference to repository database [I11670]. Rating

**Value:** code="0" Absent

**Value:** code="1" Present

**Value:** code="2" Unknown (could not rate)

## Thought\_Insert

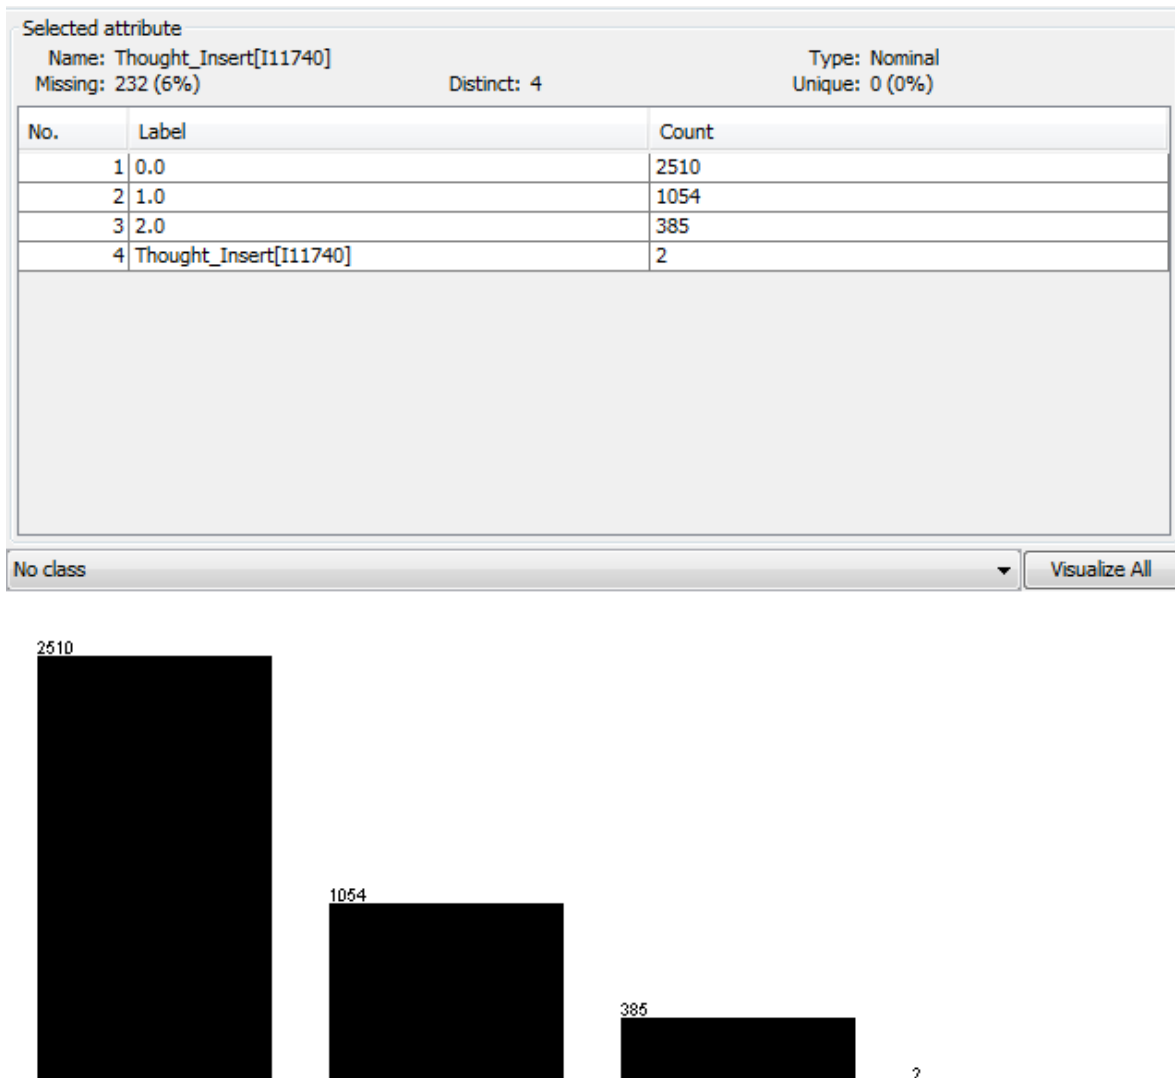

**Variable id**="phv00071387.v1"

**Description:** Delusion of thoughts being inserted (when psychotic and without other comorbid features present), followed by the raw repository SAS database field name in brackets for cross-reference to repository database [I11740]. Rating

**Value:** code="0" Absent

**Value:** code="1" Present

**Value:** code="2" Unknown (could not rate)

## Thought\_Withdraw

Selected attribute

Name: Thought\_Withdraw[I11810]      Type: Nominal  
Missing: 235 (6%)      Distinct: 4      Unique: 0 (0%)

| No. | Label                    | Count |
|-----|--------------------------|-------|
| 1   | 0.0                      | 3069  |
| 2   | 1.0                      | 559   |
| 3   | 2.0                      | 318   |
| 4   | Thought_Withdraw[I11810] | 2     |

No class Visualize All

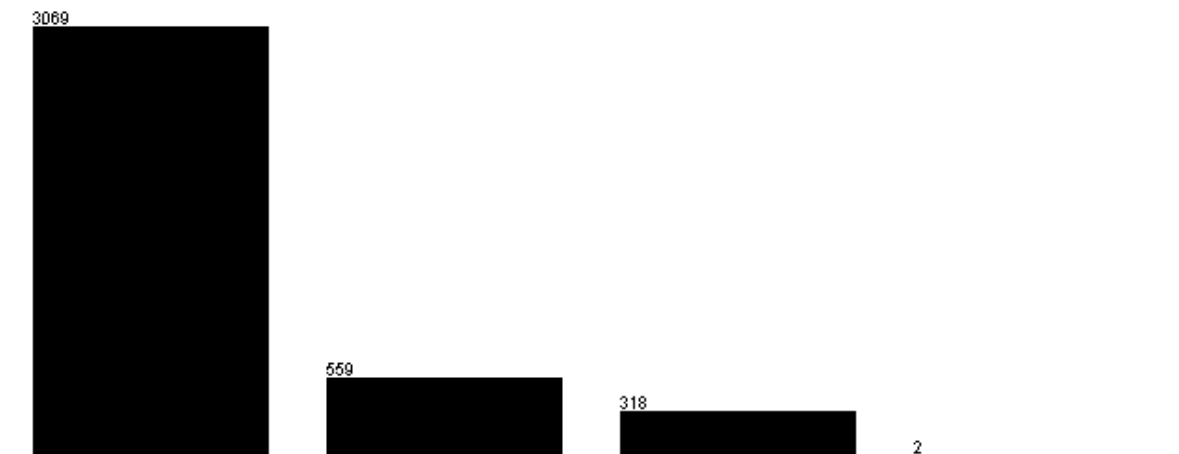

**Variable id**="phv00071388.v1"

**Description:**Delusions of thoughts being withdrawn (when psychotic and without other comorbid features present), followed by the raw repository SAS database field name in brackets for cross-reference to repository database [I11810]. Rating

**Value:** code="0" Absent

**Value:** code="1" Present

**Value:** code="2" Unknown (could not rate)

## Duration\_Delusions\_Weeks

Selected attribute

Name: Duration\_Delusions\_Weeks[I11970]      Type: Nominal  
Missing: 392 (9%)      Distinct: 150      Unique: 78 (2%)

| No. | Label | Count |
|-----|-------|-------|
| 1   | 999.0 | 1676  |
| 2   | 468.0 | 58    |
| 3   | 780.0 | 74    |
| 4   | 48.0  | 1     |
| 5   | 104.0 | 65    |
| 6   | 520.0 | 82    |
| 7   | 0.0   | 117   |
| 8   | 988.0 | 43    |
| 9   | 4.0   | 31    |
| 10  | u     | 245   |
| 11  | 260.0 | 72    |
| 12  | 728.0 | 53    |
| 13  | 572.0 | 45    |

No class      Visualize All

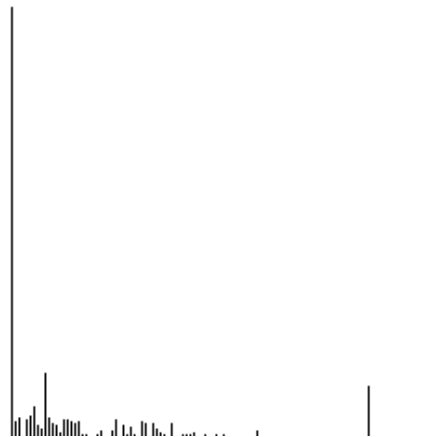

**Variable id**="phv00071390.v1"

**Description:** Longest period of time that delusions have persisted according to subject (when psychotic and without other comorbid features present), followed by the raw repository SAS database field name in brackets for cross-reference to repository database [I11970]

**Value:** code="999" 999 weeks or more

**Value:** code="u" Unknown (could not rate)

## Delusion\_Fragment

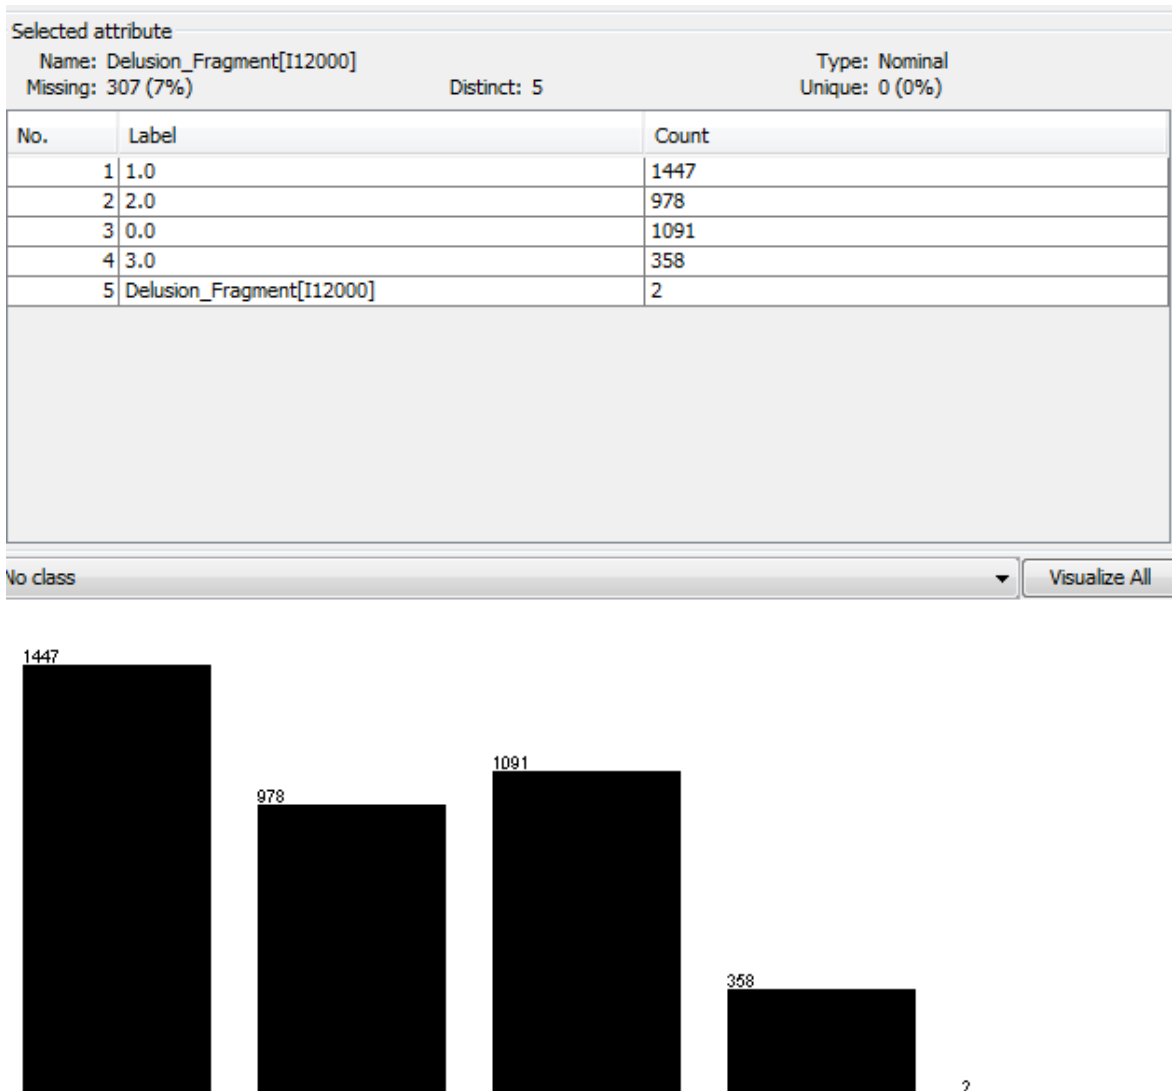

**Variable id**="phv00071391.v1"

**Description:**Fragmentary delusions - more than one theme (when psychotic and without other comorbid features present), followed by the raw repository SAS database field name in brackets for cross-reference to repository database [I12000]. Rating

**Value:** code="0" Absent

**Value:** code="1" Somewhat

**Value:** code="2" Definite

**Value:** code="3" Unknown (could not rate)

## Delusion\_Widespread

| Selected attribute                |                             |                |
|-----------------------------------|-----------------------------|----------------|
| Name: Delusion_Widespread[I12010] |                             | Type: Nominal  |
| Missing: 300 (7%)                 | Distinct: 4                 | Unique: 0 (0%) |
| No.                               | Label                       | Count          |
| 1                                 | 1.0                         | 2902           |
| 2                                 | 0.0                         | 498            |
| 3                                 | 2.0                         | 481            |
| 4                                 | Delusion_Widespread[I12010] | 2              |

No class Visualize All

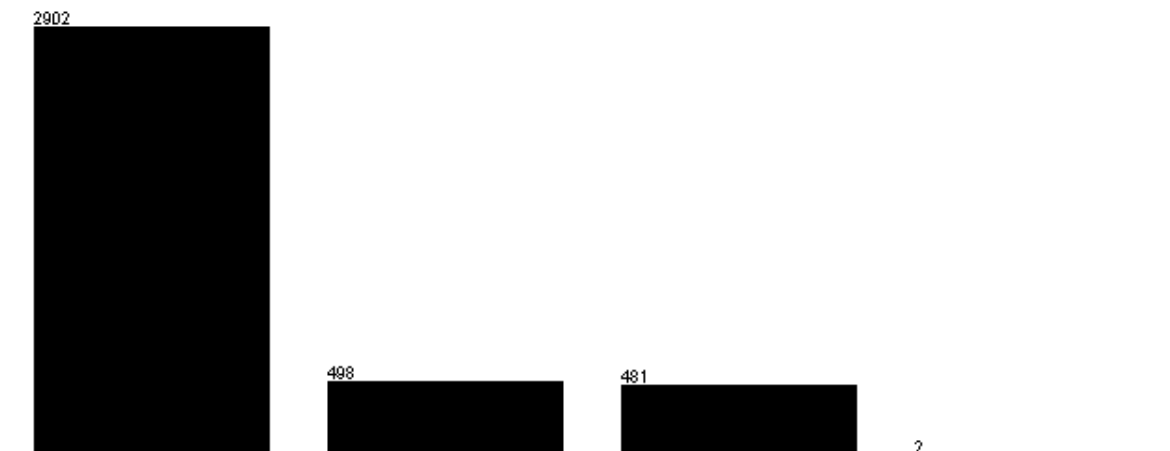

**Variable id**="phv00071392.v1"

**Description:**Widespread delusions (when psychotic and without other comorbid features present), followed by the raw repository SAS database field name in brackets for cross-reference to repository database [I12010]. Rating

**Value:** code="0" Absent

**Value:** code="1" Somewhat

**Value:** code="2" Definite

**Value:** code="3" Unknown (could not rate)

## Delusion\_Bizarre

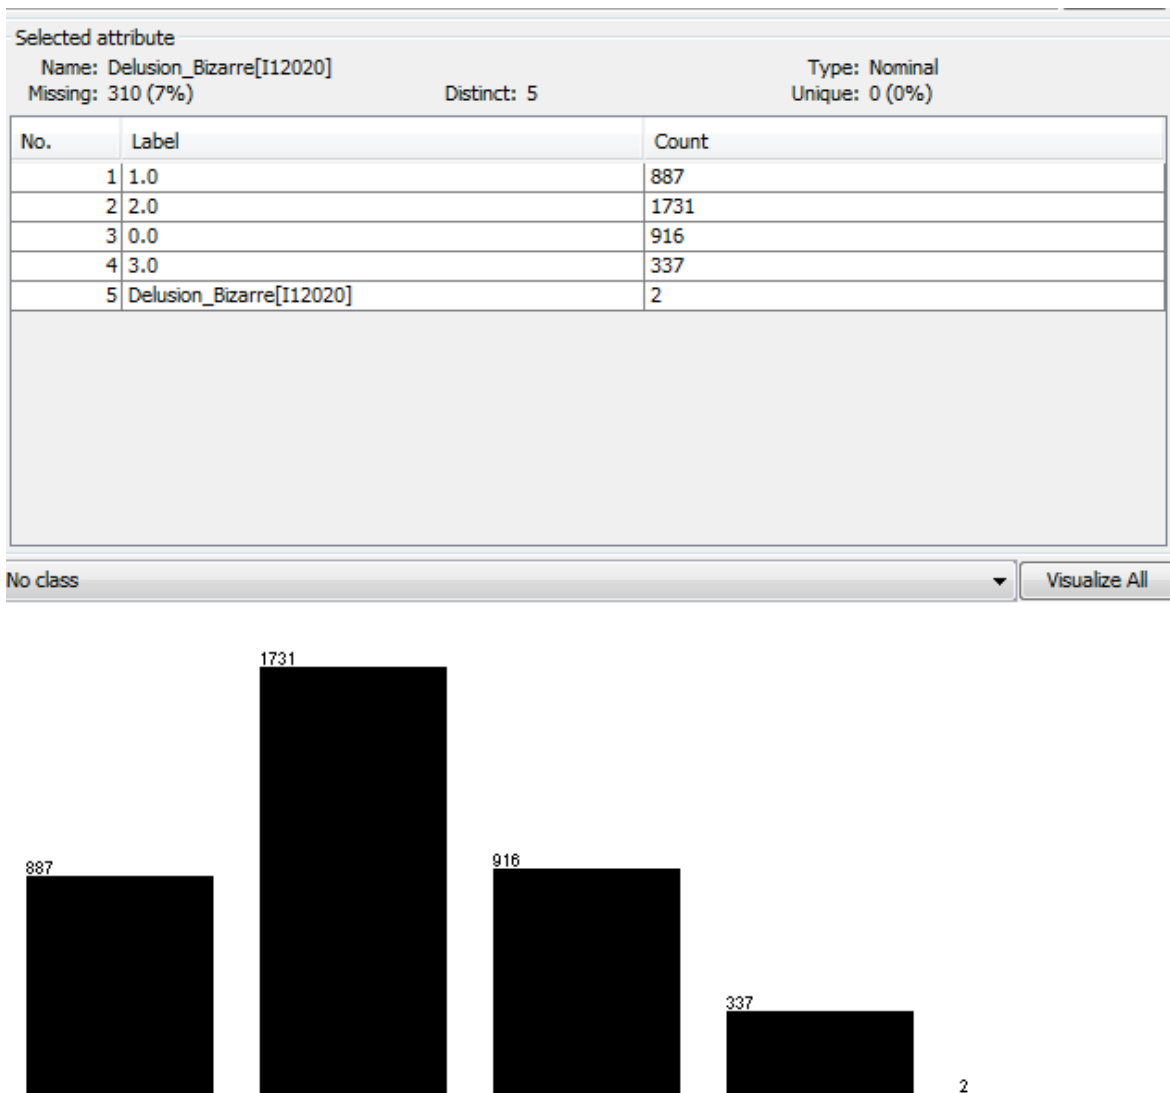

**Variable id**="phv00071393.v1"

**Description:** Bizarre delusions - impossible, could not occur in real life (when psychotic and without other comorbid features present), followed by the raw repository SAS database field name in brackets for cross-reference to repository database [I12020]. Rating

**Value:** code="0" Absent

**Value:** code="1" Somewhat

**Value:** code="2" Definite

**Value:** code="3" Unknown (could not rate)



## AH(Voices\_Noises\_Music)

| Selected attribute                    |                                 |                |
|---------------------------------------|---------------------------------|----------------|
| Name: AH(Voices_Noises_Music)[I12030] |                                 | Type: Nominal  |
| Missing: 346 (8%)                     |                                 | Distinct: 4    |
|                                       |                                 | Unique: 0 (0%) |
| No.                                   | Label                           | Count          |
| 1                                     | 1.0                             | 3221           |
| 2                                     | 0.0                             | 415            |
| 3                                     | 2.0                             | 199            |
| 4                                     | AH(Voices_Noises_Music)[I12030] | 2              |

No class Visualize All

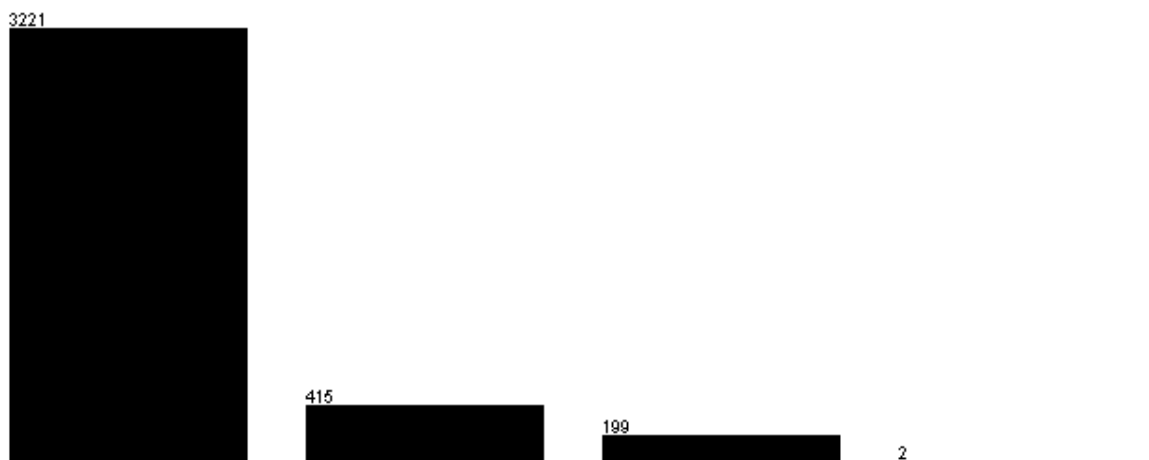

**Variable id**="phv00071394.v1"

**Description:** Auditory Hallucinations (Voices Noises Music) (when psychotic and without other comorbid features present), followed by the raw repository SAS database field name in brackets for cross-reference to repository database [I12030]. Rating

**Value:** code="0" Absent

**Value:** code="1" Present

**Value:** code="2" Unknown (could not rate)

## Running\_Comment

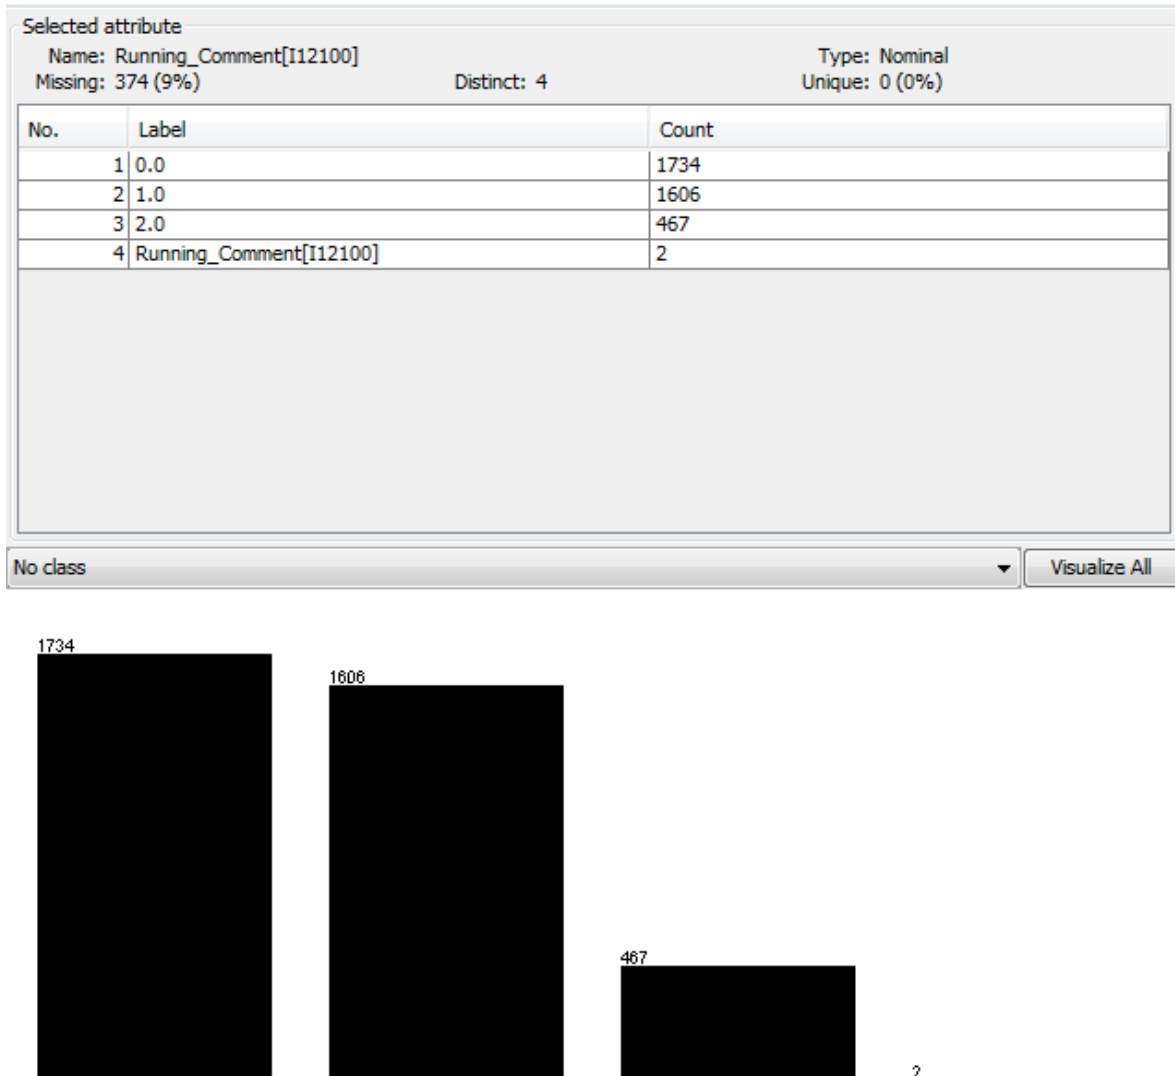

**Variable id="phv00071395.v1"**

**Description:** Auditory hallucinations of voices making a running commentary on subject's thoughts or actions (when psychotic and without other comorbid features present), followed by the raw repository SAS database field name in brackets for cross-reference to repository database [I12100]. Rating

**Value:** code="0" Absent

**Value:** code="1" Present

**Value:** code="2" Unknown (could not rate)

## Aud\_2+\_Voices

Selected attribute

Name: Aud\_2+\_Voices[I12170]      Type: Nominal  
Missing: 370 (9%)      Distinct: 4      Unique: 0 (0%)

| No. | Label                 | Count |
|-----|-----------------------|-------|
| 1   | 1.0                   | 1463  |
| 2   | 0.0                   | 1945  |
| 3   | 2.0                   | 403   |
| 4   | Aud_2+_Voices[I12170] | 2     |

No class      Visualize All

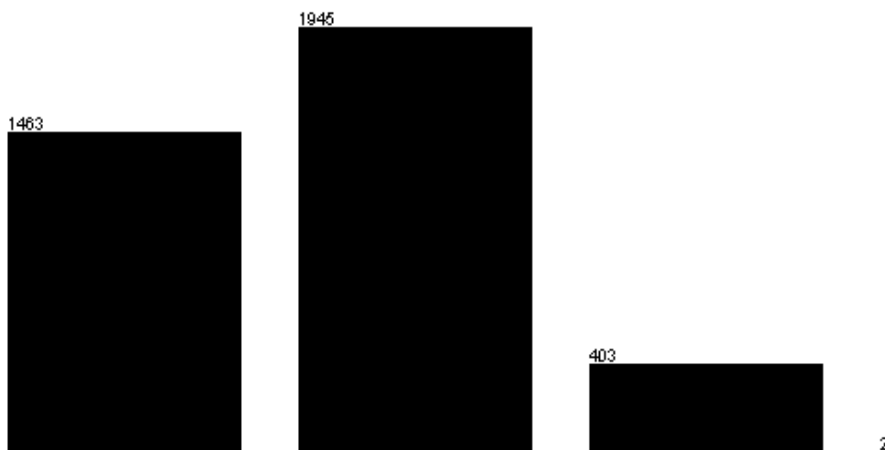

**Variable id="phv00071396.v1"**

**Description:** Auditory hallucinations of 2+ voices conversing with each other (when psychotic and without other comorbid features present), followed by the raw repository SAS database field name in brackets for cross-reference to repository database [I12170]. Rating

**Value:** code="0" Absent

**Value:** code="1" Present

**Value:** code="2" Unknown (could not rate)

## Thought\_Echo

Selected attribute

Name: Thought\_Echo[I12240]  
Missing: 378 (9%)  
Distinct: 4  
Type: Nominal  
Unique: 0 (0%)

| No. | Label                | Count |
|-----|----------------------|-------|
| 1   | 1.0                  | 882   |
| 2   | 0.0                  | 2507  |
| 3   | 2.0                  | 414   |
| 4   | Thought_Echo[I12240] | 2     |

No class Visualize All

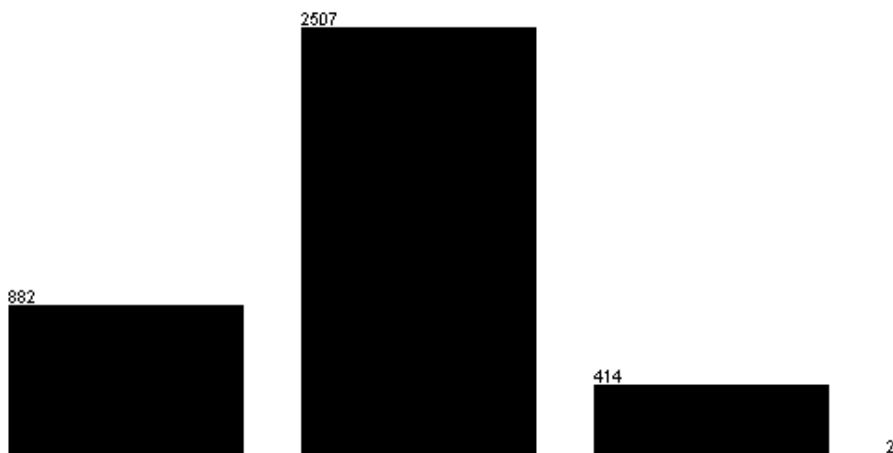

**Variable id**="phv00071397.v1"

**Description:** Hallucinations of thoughts being echoed out loud (when psychotic and without other comorbid features present), followed by the raw repository SAS database field name in brackets for cross-reference to repository database [I12240]. Rating

**Value:** code="0" Absent

**Value:** code="1" Present

**Value:** code="2" Unknown (could not rate)

## Audible\_Thoughts

| Selected attribute             |                          |                |
|--------------------------------|--------------------------|----------------|
| Name: Audible_Thoughts[I12310] |                          | Type: Nominal  |
| Missing: 372 (9%)              |                          | Distinct: 4    |
|                                |                          | Unique: 0 (0%) |
| No.                            | Label                    | Count          |
| 1                              | 1.0                      | 774            |
| 2                              | 0.0                      | 2619           |
| 3                              | 2.0                      | 416            |
| 4                              | Audible_Thoughts[I12310] | 2              |

No class Visualize All

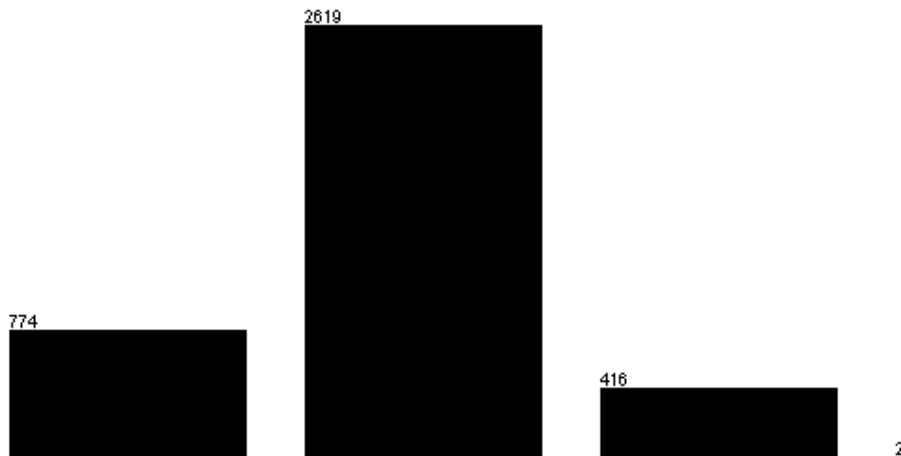

**Variable id**="phv00071398.v1"

**Description:** Heard own thoughts out loud (when psychotic and without other comorbid features present), followed by the raw repository SAS database field name in brackets for cross-reference to repository database [I12310]. Rating

**Value:** code="0" Absent

**Value:** code="1" Present

**Value:** code="2" Unknown (could not rate)

## AH\_See\_person

Selected attribute

Name: AH\_See\_Person[I12450]      Type: Nominal  
Missing: 375 (9%)      Distinct: 4      Unique: 0 (0%)

| No. | Label                 | Count |
|-----|-----------------------|-------|
| 1   | 0.0                   | 2776  |
| 2   | 1.0                   | 692   |
| 3   | 2.0                   | 338   |
| 4   | AH_See_Person[I12450] | 2     |

No class Visualize All

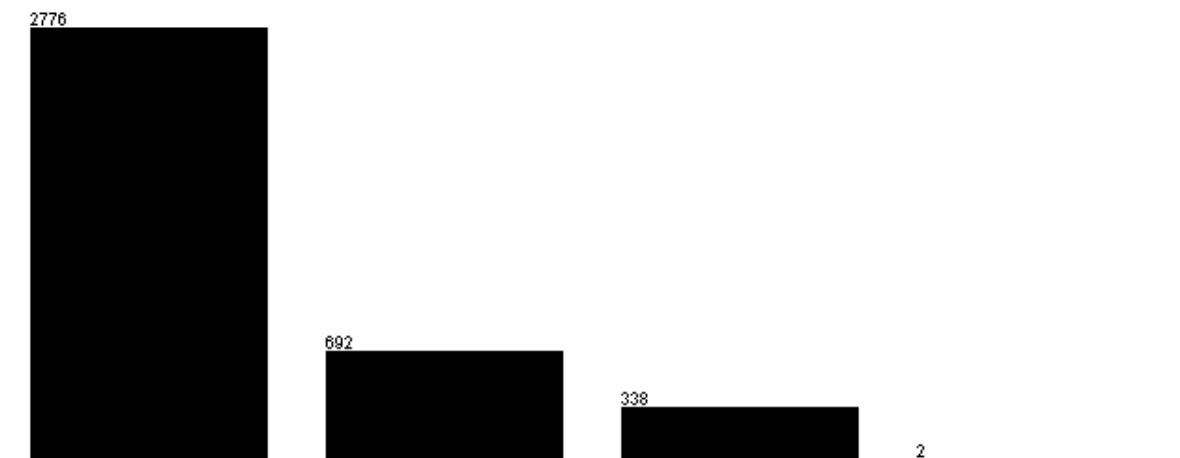

**Variable id**="phv00071399.v1"

**Description:** Having voices and concurrently seeing the "person" speaking (when psychotic and without other comorbid features present), followed by the raw repository SAS database field name in brackets for cross-reference to repository database [I12450]. Rating

**Value:** code="0" Absent

**Value:** code="1" Present

**Value:** code="2" Unknown (could not rate)

## Somatic\_Tactile

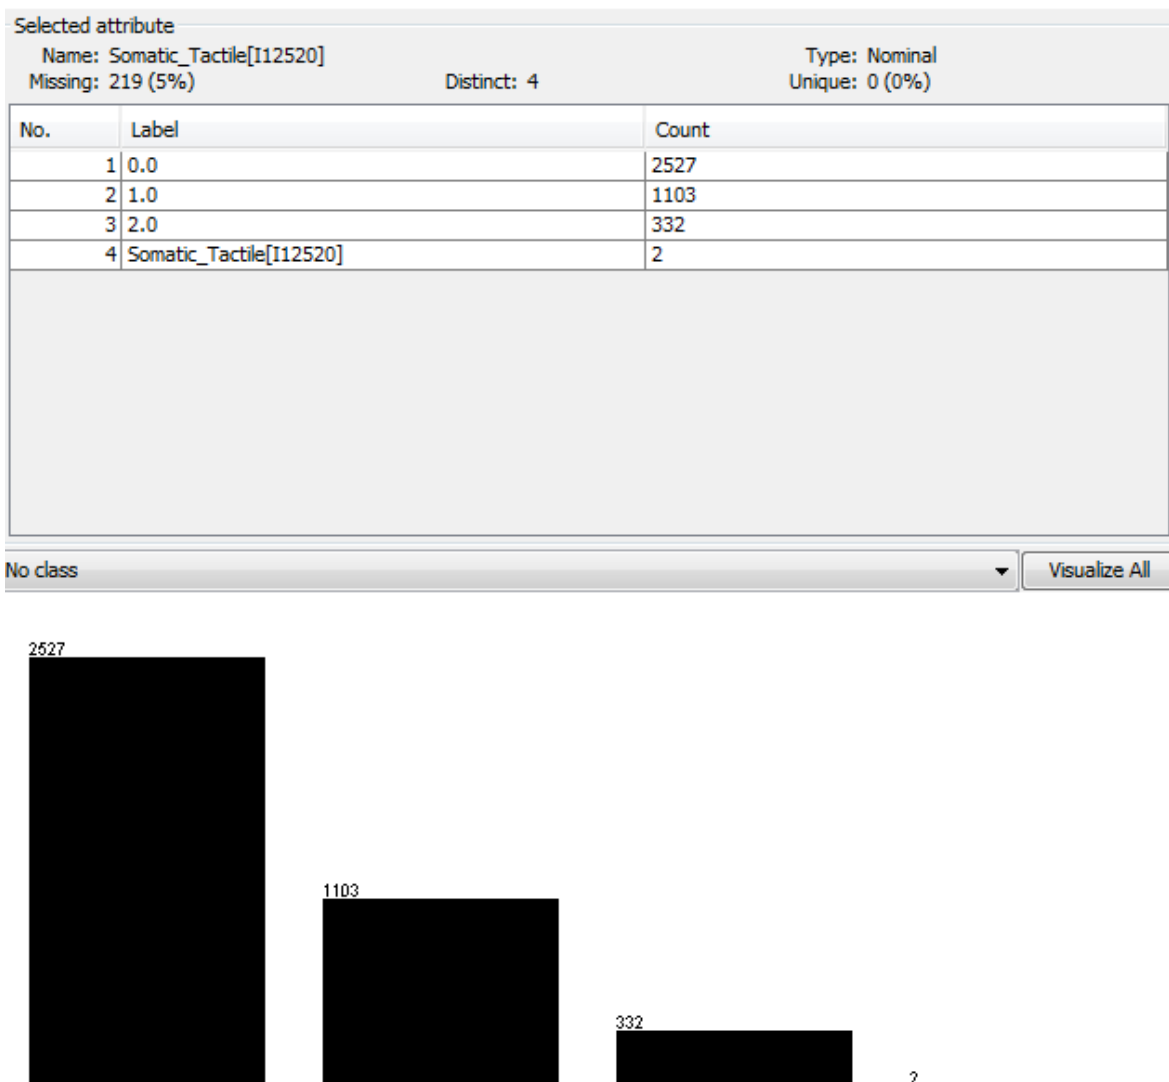

**Variable id**="phv00071400.v1"

**Description:** Somatic or tactile hallucinations (when psychotic and without other comorbid features present), followed by the raw repository SAS database field name in brackets for cross-reference to repository database [I12520]. Rating

**Value:** code="0" Absent

**Value:** code="1" Present

**Value:** code="2" Unknown (could not rate)

## Olfactory\_Hal

Selected attribute

Name: Olfactory\_Hal[I12590]      Type: Nominal  
Missing: 213 (5%)      Distinct: 4      Unique: 0 (0%)

| No. | Label                 | Count |
|-----|-----------------------|-------|
| 1   | 0.0                   | 2780  |
| 2   | 1.0                   | 847   |
| 3   | 2.0                   | 341   |
| 4   | Olfactory_Hal[I12590] | 2     |

No class Visualize All

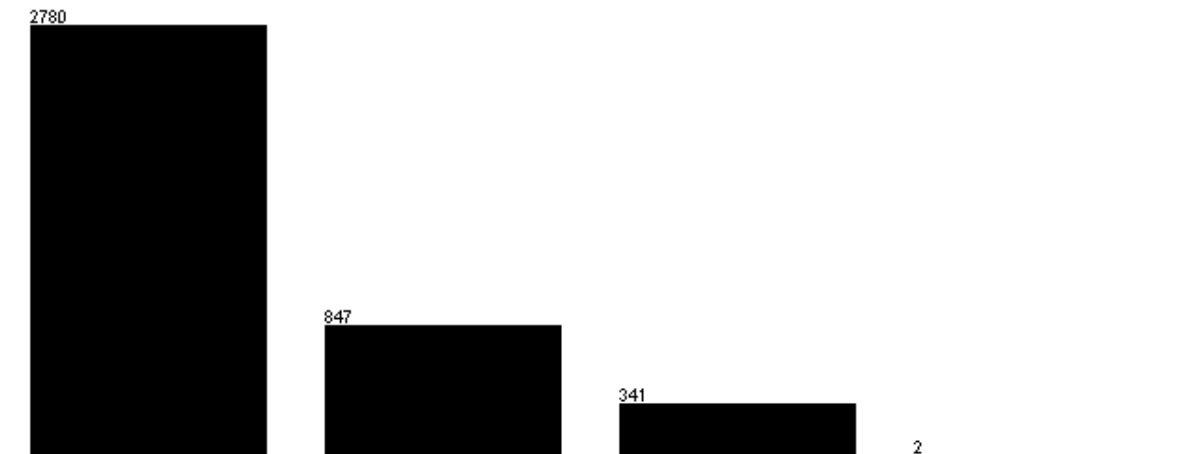

**Variable id="phv00071401.v1"**

**Description:** Olfactory hallucinations (when psychotic and without other comorbid features present), followed by the raw repository SAS database field name in brackets for cross-reference to repository database [I12590]. Rating

**Value:** code="0" Absent

**Value:** code="1" Present

**Value:** code="2" Unknown (could not rate)



## Visual\_Hal

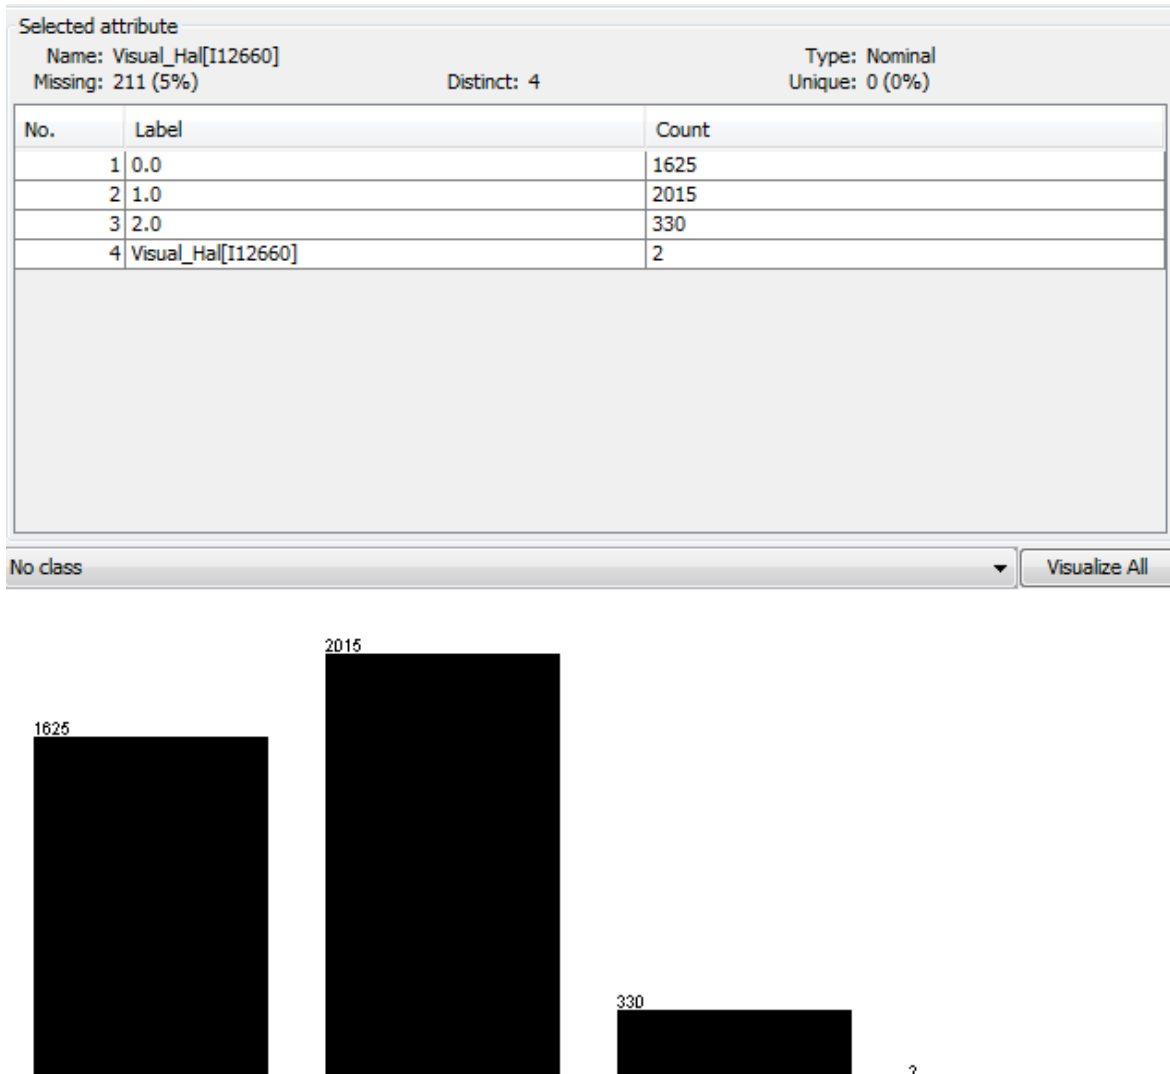

**Variable id**="phv00071402.v1"

**Description**: Visual hallucinations (when psychotic and without other comorbid features present), followed by the raw repository SAS database field name in brackets for cross-reference to repository database [I12660]. Rating

**Value**: code="0" Absent

**Value**: code="1" Present

**Value**: code="2" Unknown (could not rate)

## Gustatory\_Hal

| Selected attribute          |                       |                |
|-----------------------------|-----------------------|----------------|
| Name: Gustatory_Hal[I12730] |                       | Type: Nominal  |
| Missing: 223 (5%)           |                       | Distinct: 4    |
|                             |                       | Unique: 0 (0%) |
| No.                         | Label                 | Count          |
| 1                           | 0.0                   | 3199           |
| 2                           | 1.0                   | 452            |
| 3                           | 2.0                   | 307            |
| 4                           | Gustatory_Hal[I12730] | 2              |

No class Visualize All

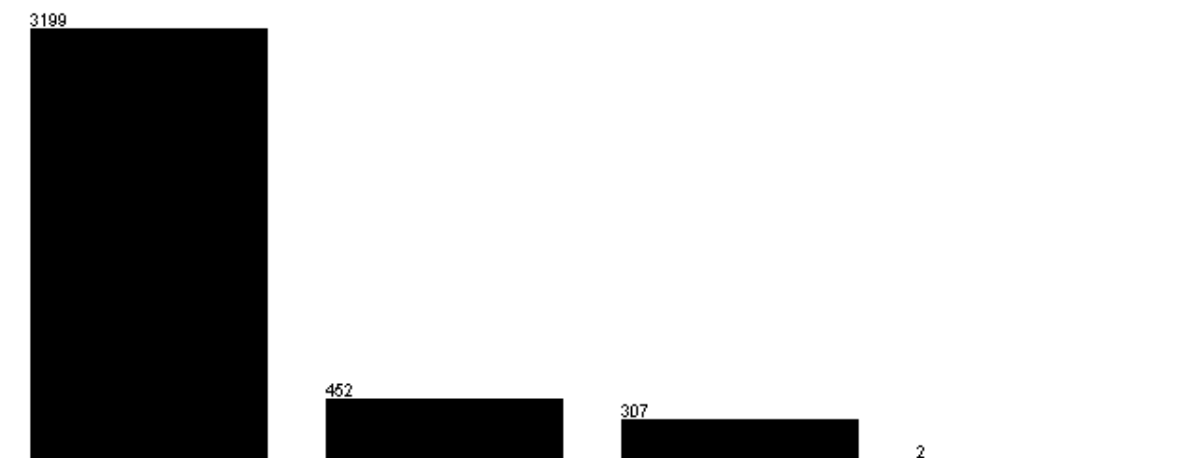

**Variable id**="phv00071403.v1"

**Description:** Gustatory hallucinations (when psychotic and without other comorbid features present), followed by the raw repository SAS database field name in brackets for cross-reference to repository database [I12730]. Rating

**Value:** code="0" Absent

**Value:** code="1" Present

**Value:** code="2" Unknown (could not rate)

## Halluc\_Longest\_Days

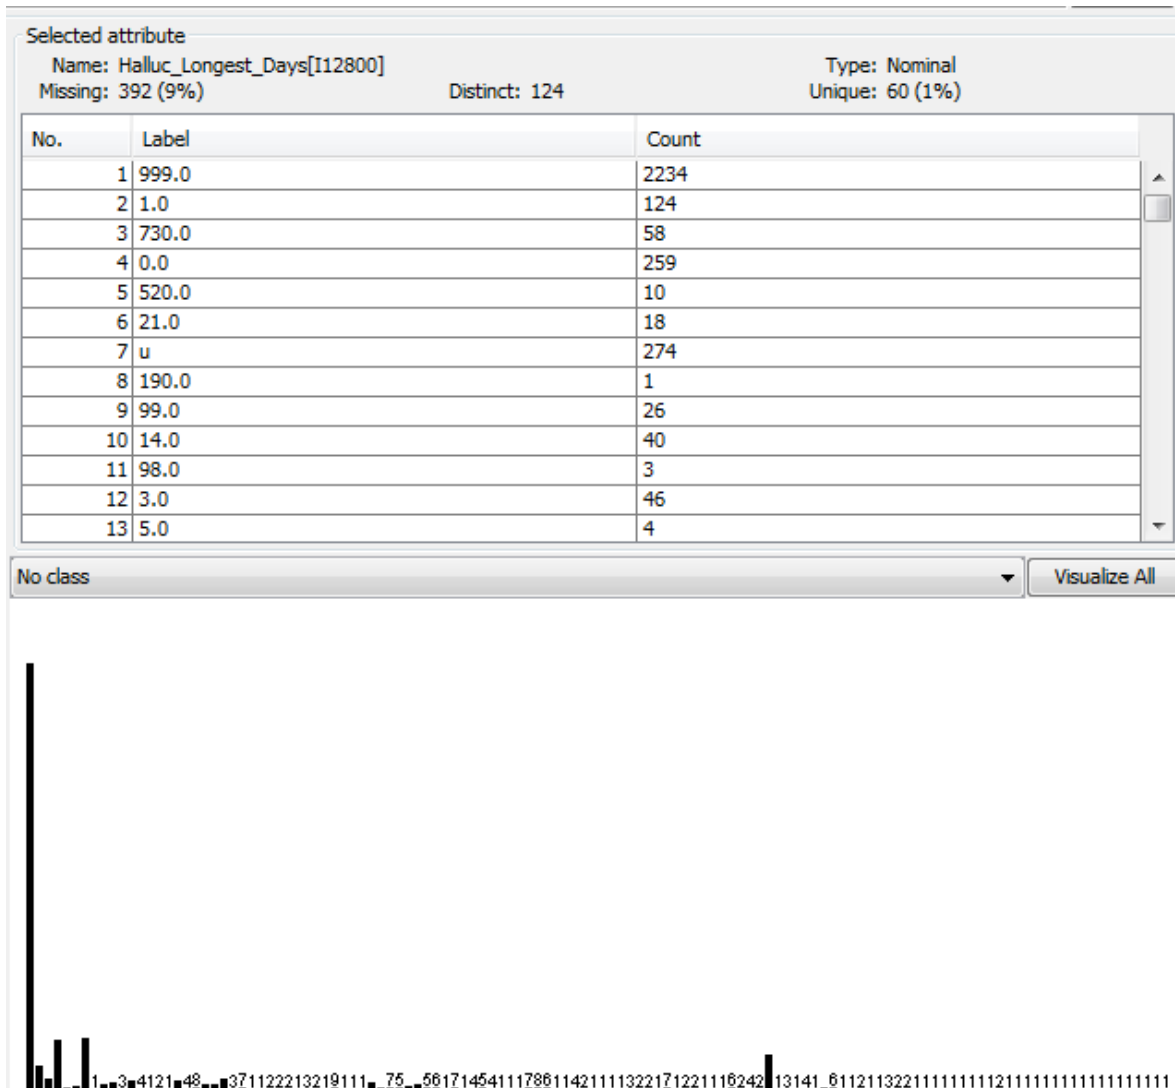

Variable id="phv00071404.v1"

**Description:** Longest period of time that hallucinations have persisted according to subject, in days, followed by the raw repository SAS database field name in brackets for cross-reference to repository database [I12800]

**Value:** code="999" 999 days or more

**Value:** code="u" Unknown (could not rate)

## Hall\_All\_Day\_Several\_Days

Selected attribute

Name: Hall\_All\_Day\_Several\_Days[I12820]      Type: Nominal  
Missing: 306 (7%)      Distinct: 4      Unique: 0 (0%)

| No. | Label                             | Count |
|-----|-----------------------------------|-------|
| 1   | 1.0                               | 2933  |
| 2   | 0.0                               | 556   |
| 3   | 2.0                               | 386   |
| 4   | Hall_All_Day_Several_Days[I12820] | 2     |

No class      Visualize All

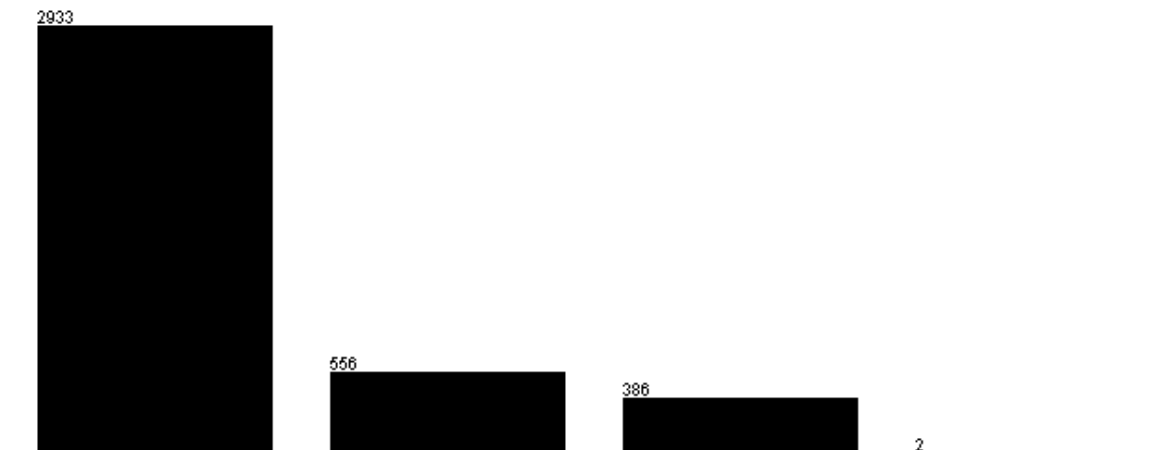

**Variable id**="phv00071405.v1"

**Description:**Hallucinations all day for several days, followed by the raw repository SAS database field name in brackets for cross-reference to repository database [I12820]. Rating

**Value:** code="0" Absent

**Value:** code="1" Present

**Value:** code="2" Unknown (could not rate)

## Del\_Also\_Hal

Selected attribute

Name: Del\_Also\_Hal[I12840]      Type: Nominal  
Missing: 401 (10%)      Distinct: 4      Unique: 0 (0%)

| No. | Label                | Count |
|-----|----------------------|-------|
| 1   | 1.0                  | 2672  |
| 2   | 2.0                  | 539   |
| 3   | 0.0                  | 569   |
| 4   | Del_Also_Hal[I12840] | 2     |

No class      Visualize All

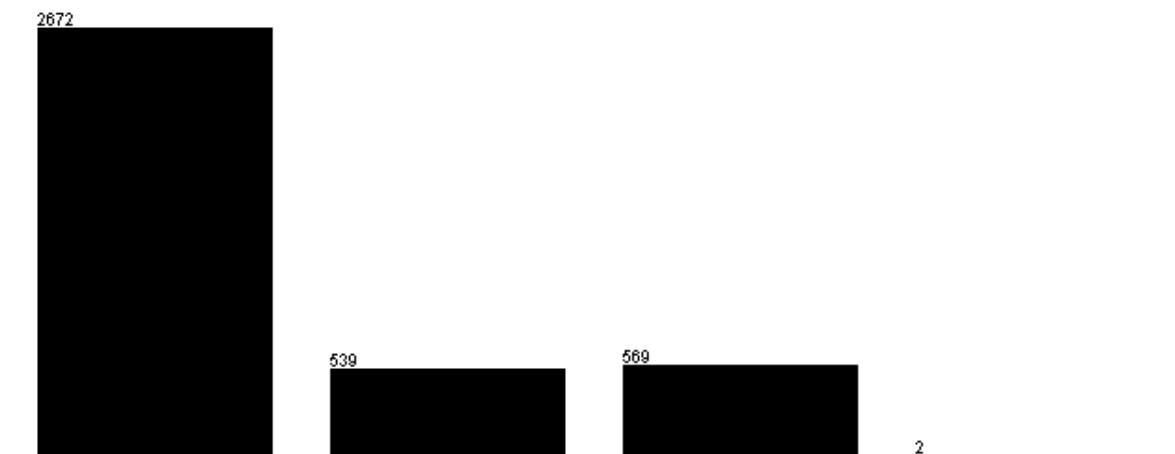

**Variable id**="phv00071406.v1"

**Description:**Delusions accompanied by hallucinations, followed by the raw repository SAS database field name in brackets for cross-reference to repository database [I12840]. Rating

**Value:** code="0" Absent

**Value:** code="1" Present

**Value:** code="2" Unknown (could not rate)

## AH\_Threatening

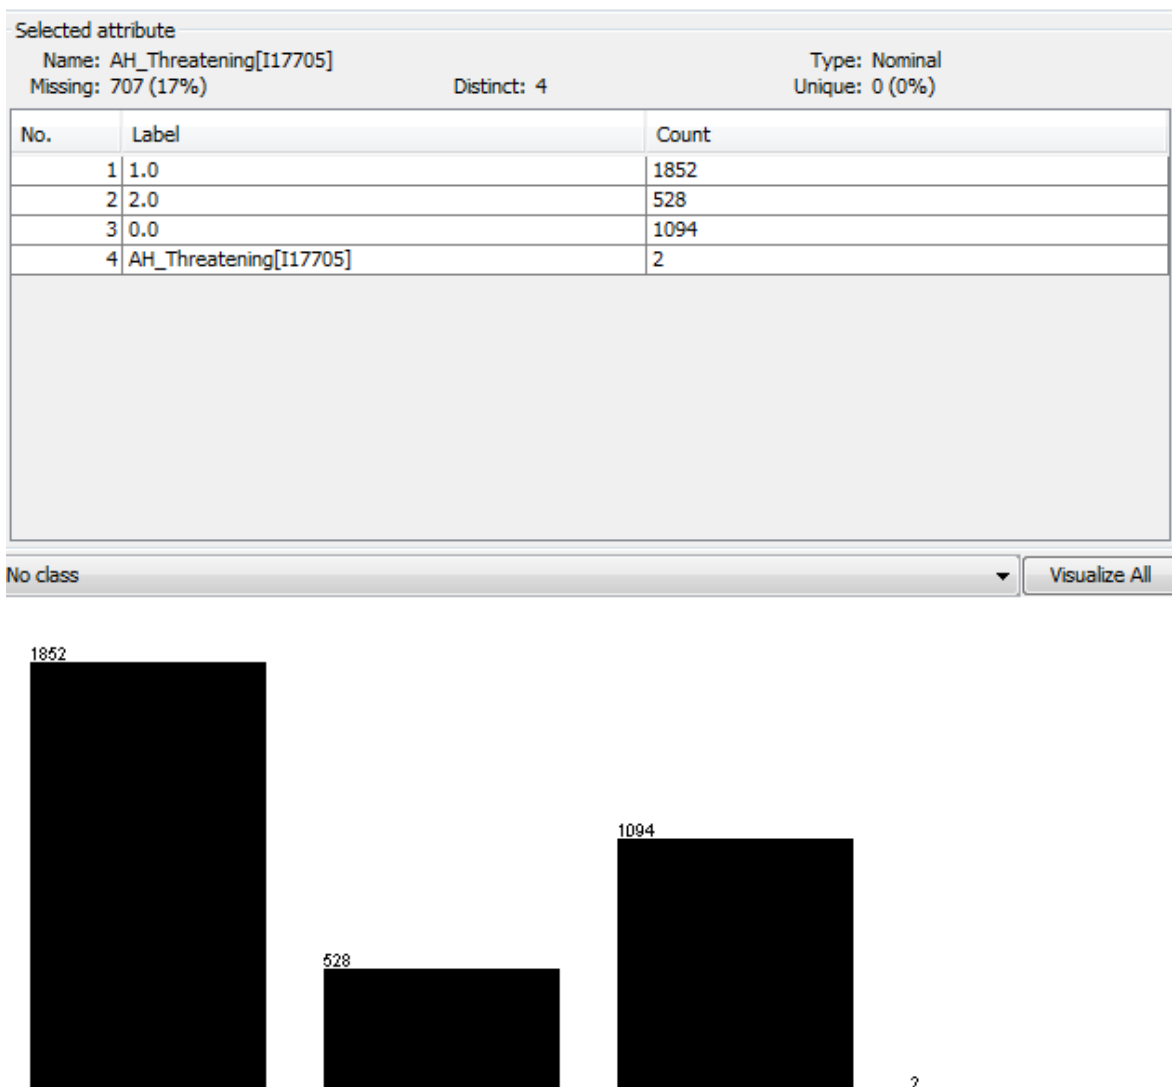

**Variable id="phv00071407.v1"**

**Description:**AH Threatening (when psychotic and without other comorbid features present), followed by the raw repository SAS database field name in brackets for cross-reference to repository database [I17705]. Rating

**Value:** code="0" Absent

**Value:** code="1" Present

**Value:** code="2" Unknown (could not rate)

## Mood\_Incongruent\_Hal

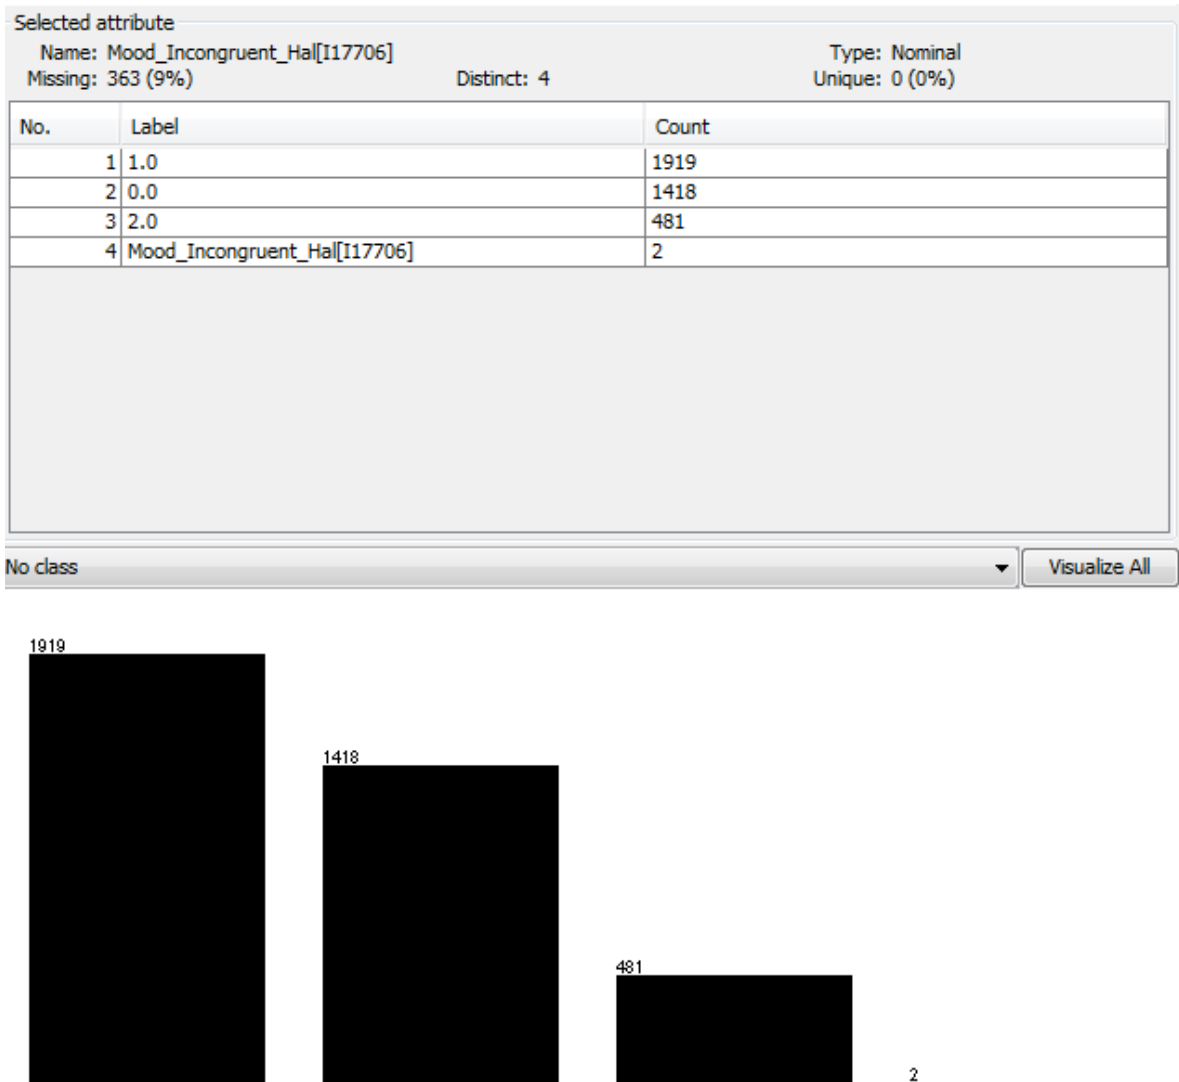

**Variable id**="phv00071408.v1"

**Description:** Mood incongruent hallucinations as judged by the interviewer, followed by the raw repository SAS database field name in brackets for cross-reference to repository database [I17706]. Rating

**Value:** code="0" Absent

**Value:** code="1" Present

**Value:** code="2" Unknown (could not rate)

## Erotomanic\_Delusions

Selected attribute

Name: Erotomanic\_Delusions[I20970]      Type: Nominal  
Missing: 309 (7%)      Distinct: 4      Unique: 0 (0%)

| No. | Label                        | Count |
|-----|------------------------------|-------|
| 1   | 0.0                          | 3036  |
| 2   | 1.0                          | 504   |
| 3   | 2.0                          | 332   |
| 4   | Erotomanic_Delusions[I20970] | 2     |

No class Visualize All

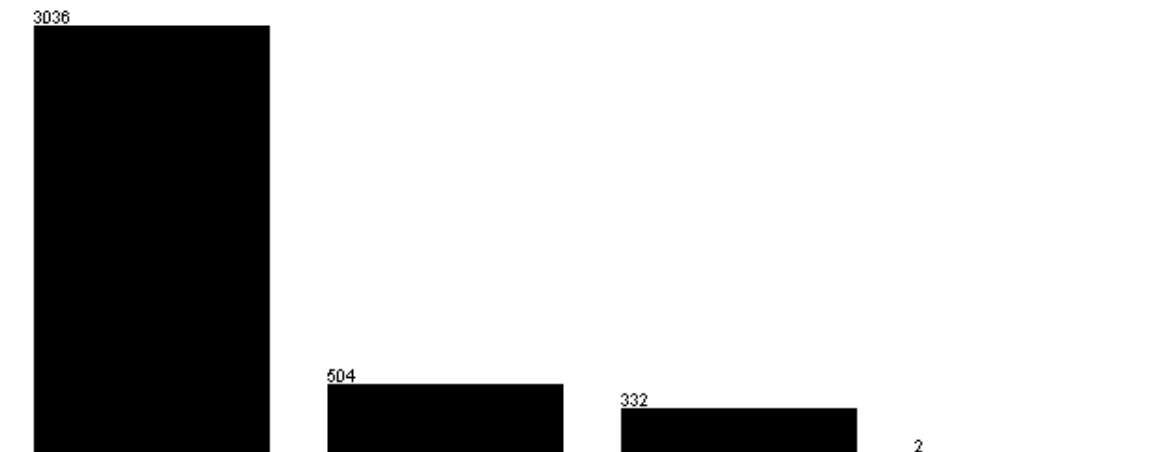

**Variable id**="phv00071409.v1"

**Description:** Erotomanic delusions (when psychotic and without other comorbid features present), followed by the raw repository SAS database field name in brackets for cross-reference to repository database [I20970]. Rating

**Value:** code="0" Absent

**Value:** code="1" Present

**Value:** code="2" Unknown (could not rate)



## Odd\_Behavior

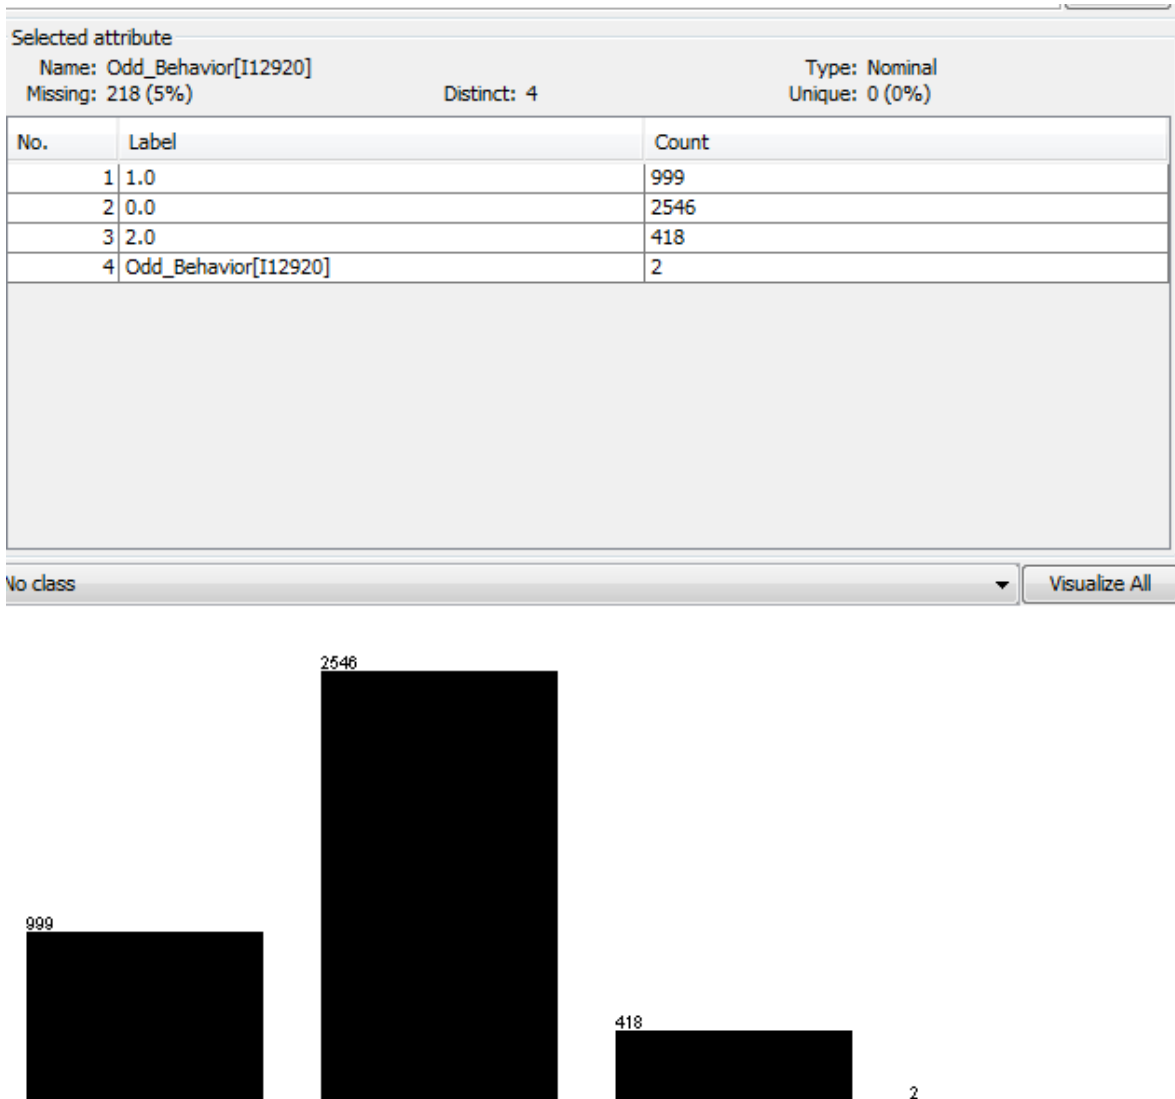

**Variable id**="phv00071410.v1"

**Description:**Odd behavior by the subject's own report or interviewer's observation (when psychotic and without other comorbid features present), followed by the raw repository SAS database field name in brackets for cross-reference to repository database [I12920]. Rating

**Value:** code="0" Absent

**Value:** code="1" Present

**Value:** code="2" Unknown (could not rate)

## Disorganized\_Speech

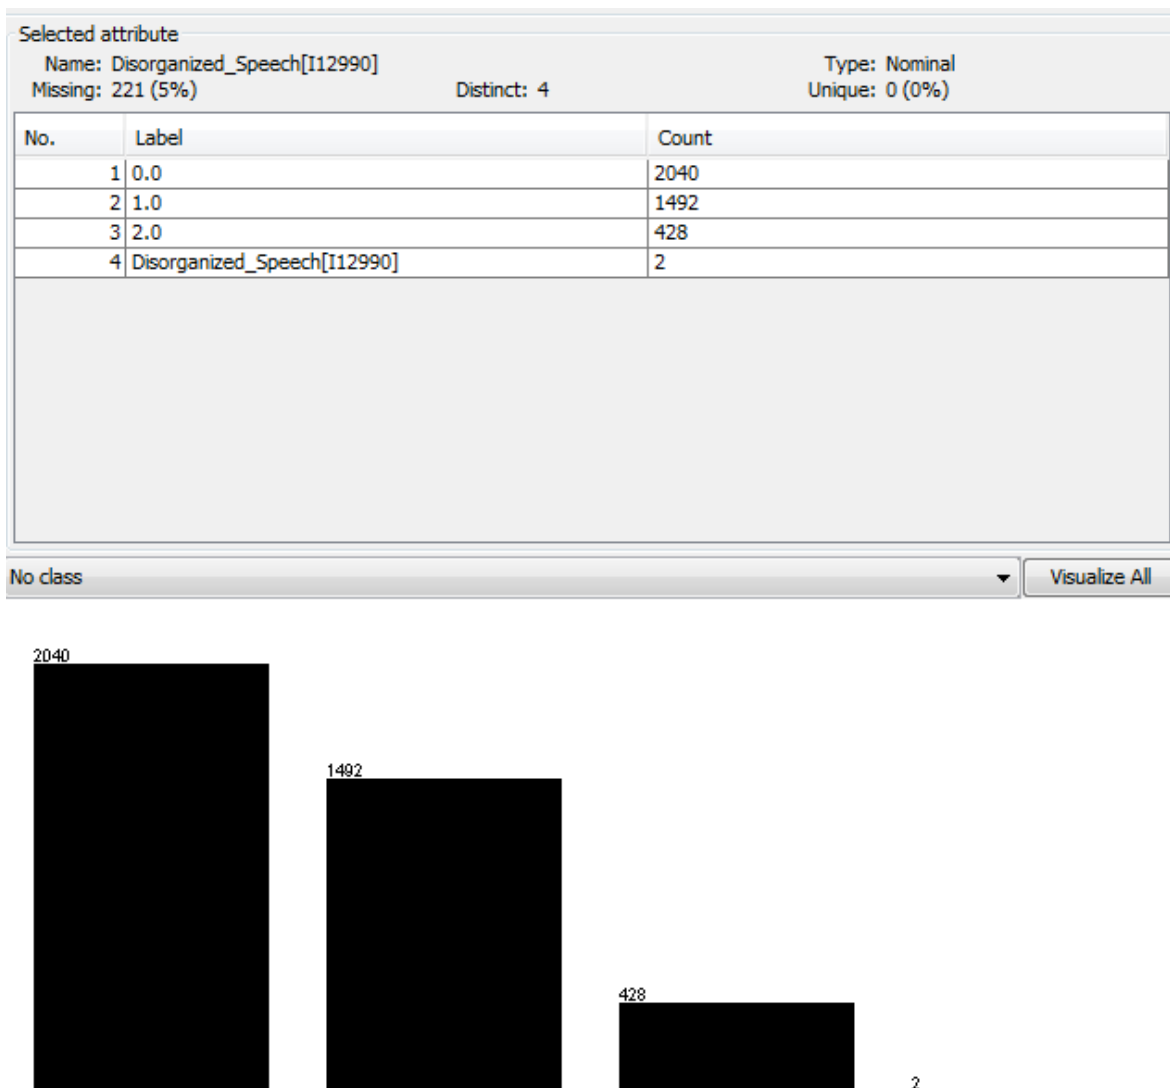

**Variable id**="phv00071411.v1"

**Description:**Disorganized speech characteristic of formal thought disorder, by the subject's own report or interviewer's observation (when psychotic and without other comorbid features present), followed by the raw repository SAS database field name in brackets for cross-reference to repository database [I12990]. Rating

**Value:** code="0" Absent

**Value:** code="1" Present

**Value:** code="2" Unknown (could not rate)

## Odd\_Speech

Selected attribute

Name: Odd\_Speech[I13060]      Type: Nominal  
Missing: 225 (5%)      Distinct: 4      Unique: 0 (0%)

| No. | Label              | Count |
|-----|--------------------|-------|
| 1   | 0.0                | 1751  |
| 2   | 1.0                | 1758  |
| 3   | 2.0                | 447   |
| 4   | Odd_Speech[I13060] | 2     |

No class      Visualize All

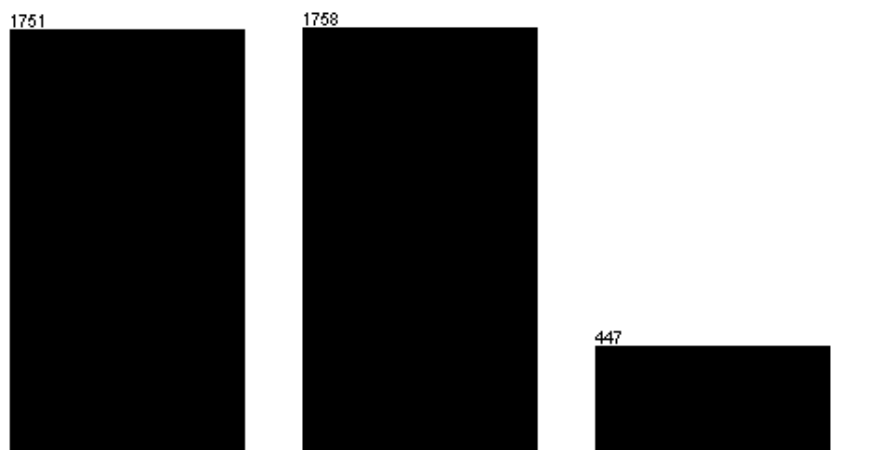

**Variable id**="phv00071412.v1"

**Description:**Odd speech (digressive, vague, but could include looseness of associations), by the subject's own report or interviewer's observation (when psychotic and without other comorbid features present), followed by the raw repository SAS database field name in brackets for cross-reference to repository database [I13060]. Rating

**Value:** code="0" Absent

**Value:** code="1" Present

**Value:** code="2" Unknown (could not rate)

## Avolition\_Apathy

Selected attribute

Name: Avolition\_Apathy[I13240]      Type: Nominal  
Missing: 220 (5%)      Distinct: 4      Unique: 0 (0%)

| No. | Label                    | Count |
|-----|--------------------------|-------|
| 1   | 0.0                      | 1525  |
| 2   | 2.0                      | 288   |
| 3   | 1.0                      | 2148  |
| 4   | Avolition_Apathy[I13240] | 2     |

No class      Visualize All

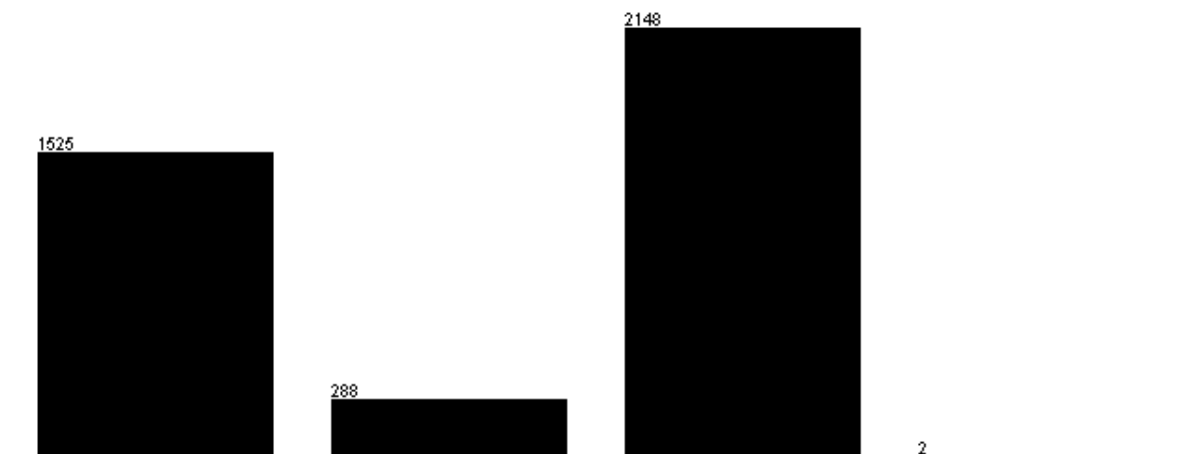

**Variable id**="phv00071413.v1"

**Description:**Avolition or apathy, by the subject's own report or interviewer's observation (when psychotic and without other comorbid features present), followed by the raw repository SAS database field name in brackets for cross-reference to repository database [I13240]. Rating

**Value:** code="0" Absent

**Value:** code="1" Present

**Value:** code="2" Unknown (could not rate)

## No\_Emotions

| Selected attribute        |                     |                |
|---------------------------|---------------------|----------------|
| Name: No_Emotions[I13310] |                     | Type: Nominal  |
| Missing: 218 (5%)         |                     | Distinct: 4    |
|                           |                     | Unique: 0 (0%) |
| No.                       | Label               | Count          |
| 1                         | 0.0                 | 1395           |
| 2                         | 2.0                 | 272            |
| 3                         | 1.0                 | 2296           |
| 4                         | No_Emotions[I13310] | 2              |

No class Visualize All

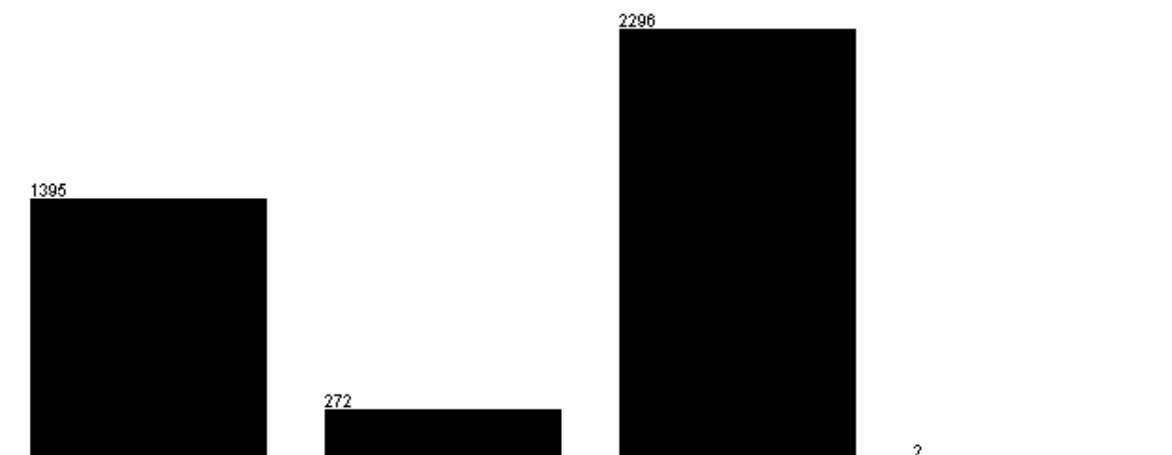

**Variable id="phv00071414.v1"**

**Description:**No emotions/flat affect, by the subject's own report or interviewer's observation (when psychotic and without other comorbid features present), followed by the raw repository SAS database field name in brackets for cross-reference to repository database [I13310]. Rating

**Value:** code="0" Absent

**Value:** code="1" Present

**Value:** code="2" Unknown (could not rate)

## Onset\_Del\_Hal\_Other

Selected attribute

Name: Onset\_Del\_Hal\_Other[I13570]      Type: Nominal  
 Missing: 203 (5%)      Distinct: 61      Unique: 7 (0%)

| No. | Label | Count |
|-----|-------|-------|
| 1   | 21.0  | 267   |
| 2   | 26.0  | 93    |
| 3   | 18.0  | 300   |
| 4   | 23.0  | 197   |
| 5   | 22.0  | 195   |
| 6   | 20.0  | 288   |
| 7   | 14.0  | 112   |
| 8   | 27.0  | 100   |
| 9   | 17.0  | 248   |
| 10  | 19.0  | 321   |
| 11  | 12.0  | 79    |
| 12  | 24.0  | 156   |
| 13  | u     | 62    |

No class      Visualize All

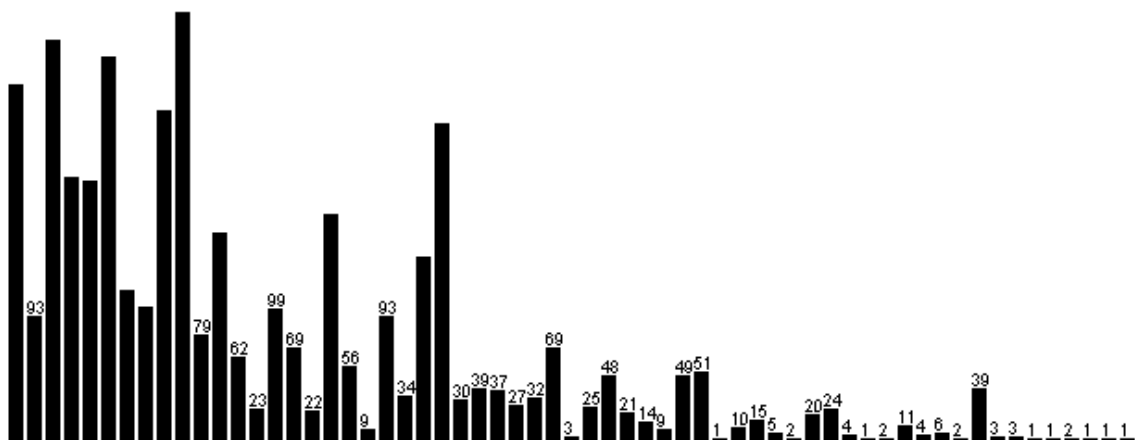

Variable id="phv00071415.v1"

**Description:** Age at onset of delusions, hallucinations or other criteria for schizophrenia, by subject's report or interviewer's judgment , followed by the raw repository SAS database field name in brackets for cross-reference to repository database [I13570]

**Value:** code="u" Unknown (could not rate)

## Psych\_SX\_Duration\_Days

Selected attribute

Name: Psych\_SX\_Duration\_Days[I13580]      Type: Nominal  
Missing: 4101 (98%)      Distinct: 9      Unique: 1 (0%)

| No. | Label                          | Count |
|-----|--------------------------------|-------|
| 1   | u                              | 8     |
| 2   | 1.0                            | 30    |
| 3   | 2.0                            | 13    |
| 4   | 6.0                            | 1     |
| 5   | 3.0                            | 13    |
| 6   | 5.0                            | 3     |
| 7   | Psych_SX_Duration_Days[I13580] | 2     |
| 8   | U                              | 8     |
| 9   | 4.0                            | 4     |

No class      Visualize All

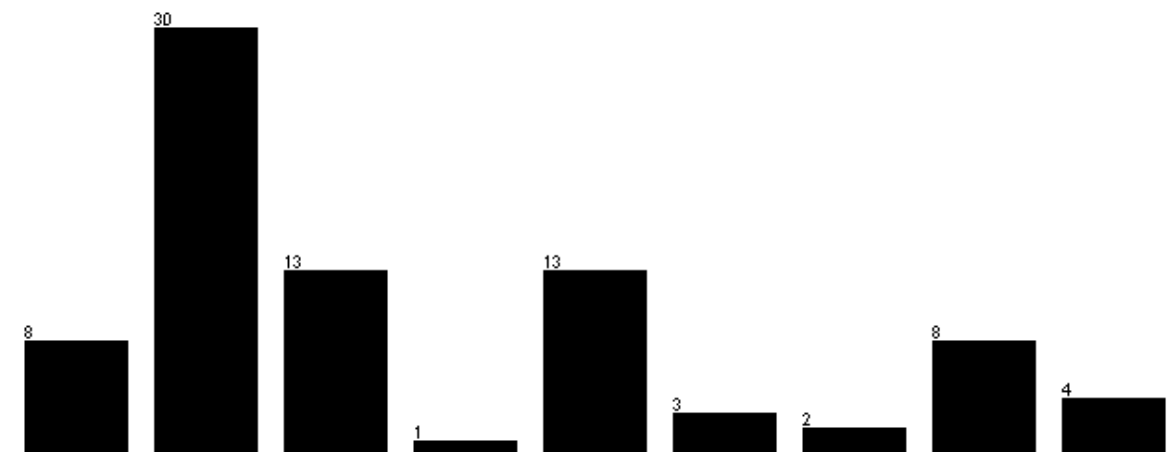

**Variable id**="phv00071416.v1"

**Description:**Duration of psychotic symptoms according to subject, in days if less than one week, otherwise coded as weeks in next item and this item is blank, followed by the raw repository SAS database field name in brackets for cross-reference to repository database [I13580]

**Value:** code="u" Unknown (could not rate)

## Psych\_SX\_Duration\_Weeks

Selected attribute

Name: Psych\_SX\_Duration\_Weeks[I13590]      Type: Nominal  
Missing: 290 (7%)      Distinct: 170      Unique: 92 (2%)

| No. | Label | Count |
|-----|-------|-------|
| 1   | 999.0 | 1987  |
| 2   | 468.0 | 60    |
| 3   | 780.0 | 84    |
| 4   | 104.0 | 69    |
| 5   | 208.0 | 47    |
| 6   | 520.0 | 98    |
| 7   | 988.0 | 49    |
| 8   | u     | 147   |
| 9   | 260.0 | 76    |
| 10  | 728.0 | 64    |
| 11  | 572.0 | 58    |
| 12  | 26.0  | 11    |
| 13  | 364.0 | 77    |

No class      Visualize All

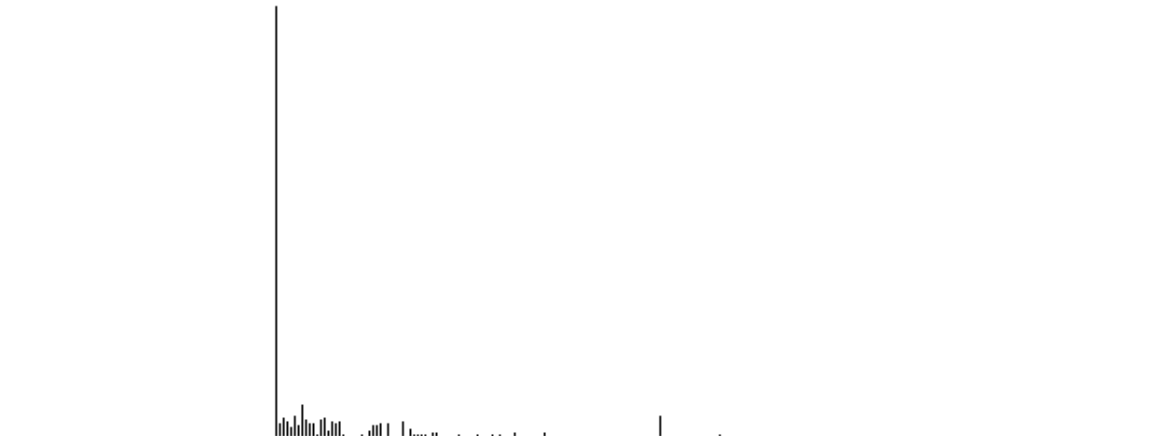

**Variable id**="phv00071417.v1"

**Description:**Duration of psychotic symptoms according to subject, in weeks if at least one week, otherwise coded as days in previous item and this item is blank, followed by the raw repository SAS database field name in brackets for cross-reference to repository database [I13580]

**Value:** code="999" 999 weeks or more

**Value:** code="u" Unknown (could not rate)



## Return\_Normal\_for\_2Months

Selected attribute

Name: Return\_Normal\_for\_2Months[I13600]      Type: Nominal  
Missing: 234 (6%)      Distinct: 4      Unique: 0 (0%)

| No. | Label                             | Count |
|-----|-----------------------------------|-------|
| 1   | 0.0                               | 3509  |
| 2   | 1.0                               | 286   |
| 3   | 2.0                               | 152   |
| 4   | Return_Normal_for_2Months[I13600] | 2     |

No class Visualize All

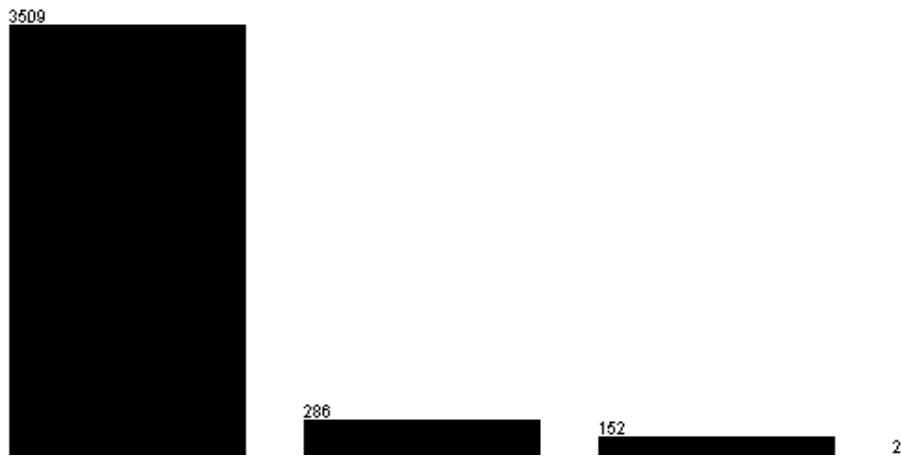

Variable id="phv00071418.v1"

**Description:** Subject's report of whether he/she ever returned to "normal" for two or more months at a time, followed by the raw repository SAS database field name in brackets for cross-reference to repository database [I13600]. Rating

**Value:** code="0" Absent

**Value:** code="1" Present

**Value:** code="2" Unknown (could not rate)

## Unable\_To\_Function

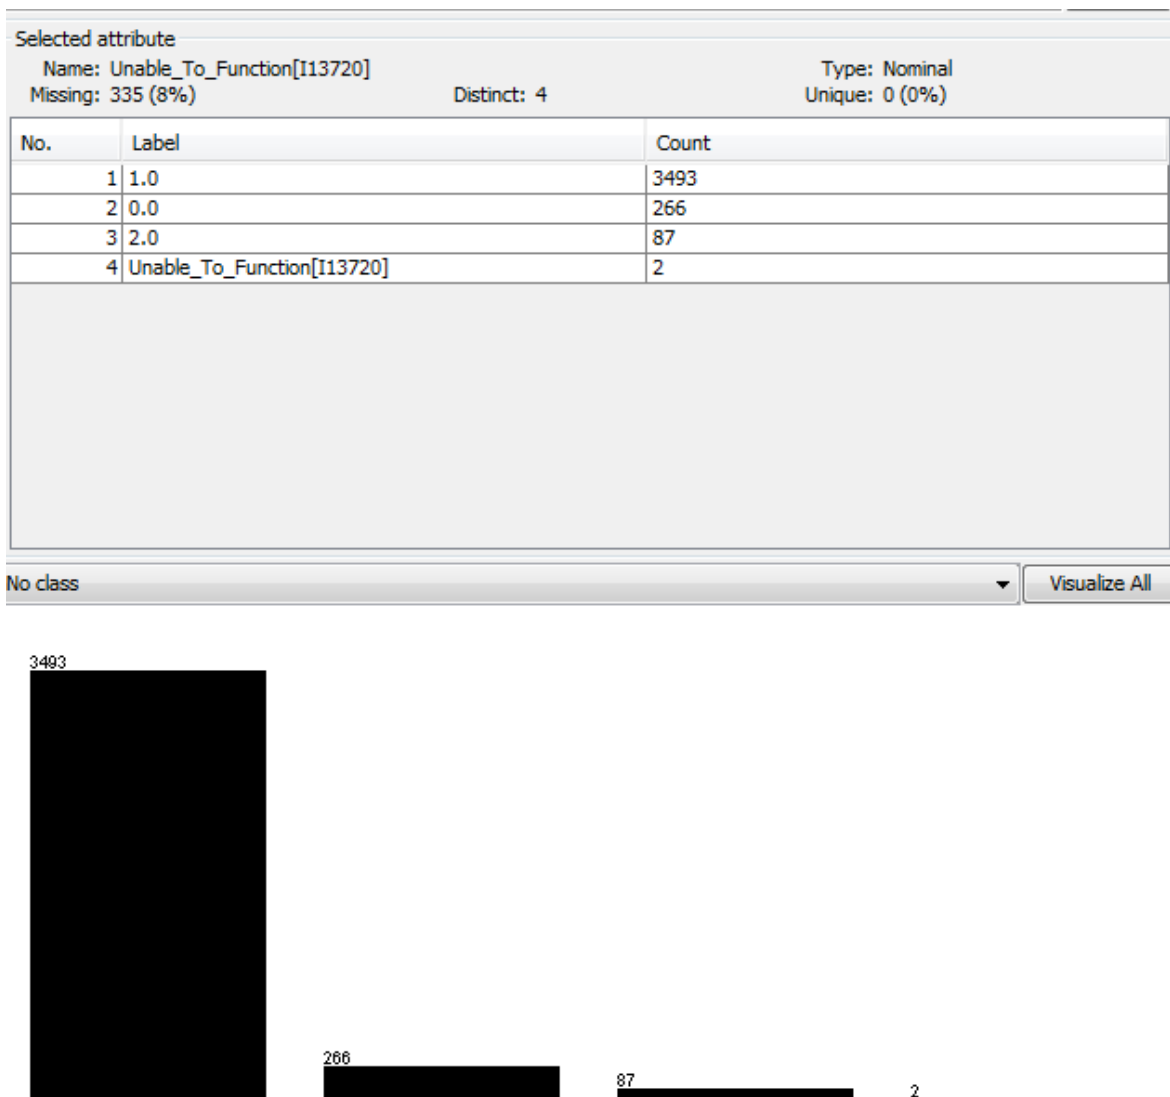

**Variable id="phv00071419.v1"**

**Description:** Subject's report of having decrease in psychosocial function in most recent episode, followed by the raw repository SAS database field name in brackets for cross-reference to repository database [I13720]. Rating

**Value:** code="0" Absent

**Value:** code="1" Present

**Value:** code="2" Unknown (could not rate)

## Polydypsia

Selected attribute

Name: Polydypsia[I14340]      Type: Nominal  
Missing: 252 (6%)      Distinct: 4      Unique: 0 (0%)

| No. | Label              | Count |
|-----|--------------------|-------|
| 1   | 0.0                | 3503  |
| 2   | 1.0                | 131   |
| 3   | 2.0                | 295   |
| 4   | Polydypsia[I14340] | 2     |

No class Visualize All

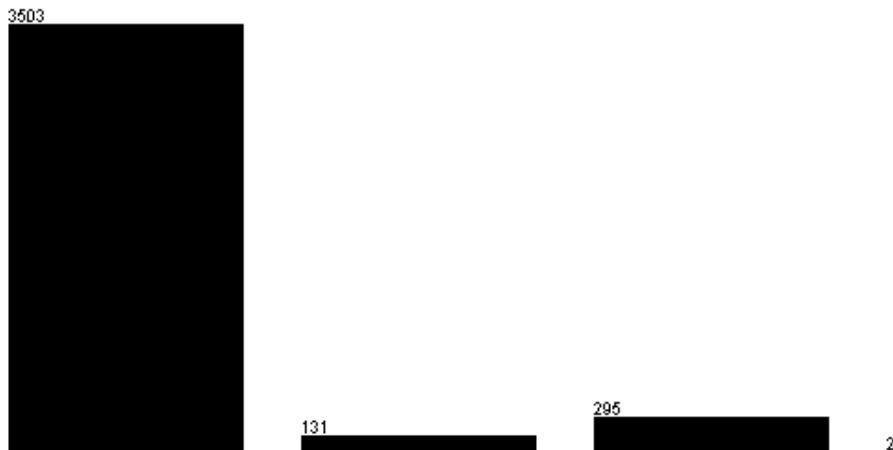

**Variable id**="phv00071420.v1"

**Description:** Polydypsia, by subject's report, followed by the raw repository SAS database field name in brackets for cross-reference to repository database [I14340]. Rating

**Value:** code="0" Absent

**Value:** code="1" Present

**Value:** code="2" Unknown (could not rate)

## Pattern\_Sx

| Selected attribute       |                    |                |
|--------------------------|--------------------|----------------|
| Name: Pattern_Sx[I14350] |                    | Type: Nominal  |
| Missing: 288 (7%)        |                    | Distinct: 7    |
|                          |                    | Unique: 0 (0%) |
| No.                      | Label              | Count          |
| 1                        | 5.0                | 1732           |
| 2                        | 1.0                | 1758           |
| 3                        | 3.0                | 169            |
| 4                        | 6.0                | 54             |
| 5                        | 2.0                | 174            |
| 6                        | 4.0                | 6              |
| 7                        | Pattern_Sx[I14350] | 2              |

No class Visualize All

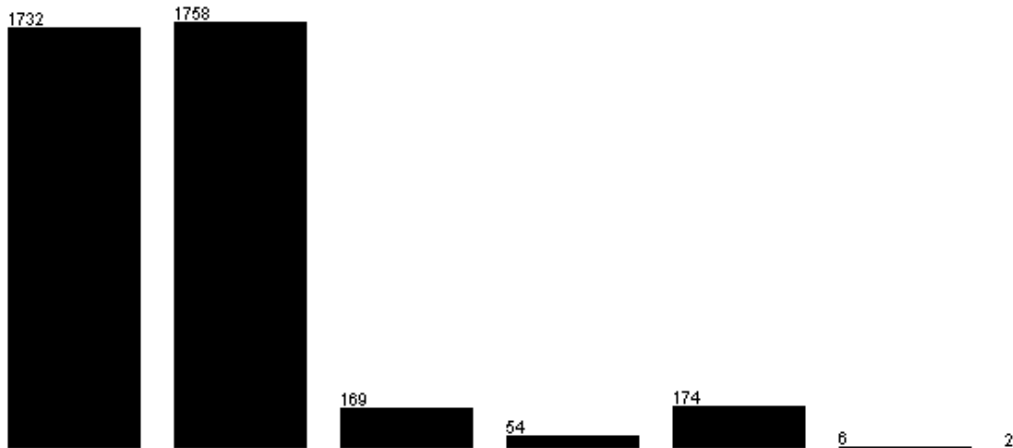

**Variable id="phv00071421.v1"**

**Description:** Pattern of positive and negative symptoms of schizophrenia , followed by the raw repository SAS database field name in brackets for cross-reference to repository database [I14350] (see DIGS booklet for extended descriptions of levels). Rating

**Value:** code="1" Continuously positive

**Value:** code="2" Predominantly negative

**Value:** code="3" Predominantly positive converting to predominantly negative

**Value:** code="4" Negative converting to positive

**Value:** code="5" Continuous mixture of positive and negative symptoms

**Value:** code="6" Unknown (could not rate)

## Severity\_Pattern

Selected attribute

Name: Severity\_Pattern[I14360]      Type: Nominal  
Missing: 220 (5%)      Distinct: 7      Unique: 0 (0%)

| No. | Label                    | Count |
|-----|--------------------------|-------|
| 1   | 4.0                      | 2335  |
| 2   | 3.0                      | 1117  |
| 3   | 2.0                      | 351   |
| 4   | 5.0                      | 96    |
| 5   | 6.0                      | 33    |
| 6   | 1.0                      | 29    |
| 7   | Severity_Pattern[I14360] | 2     |

No class      Visualize All

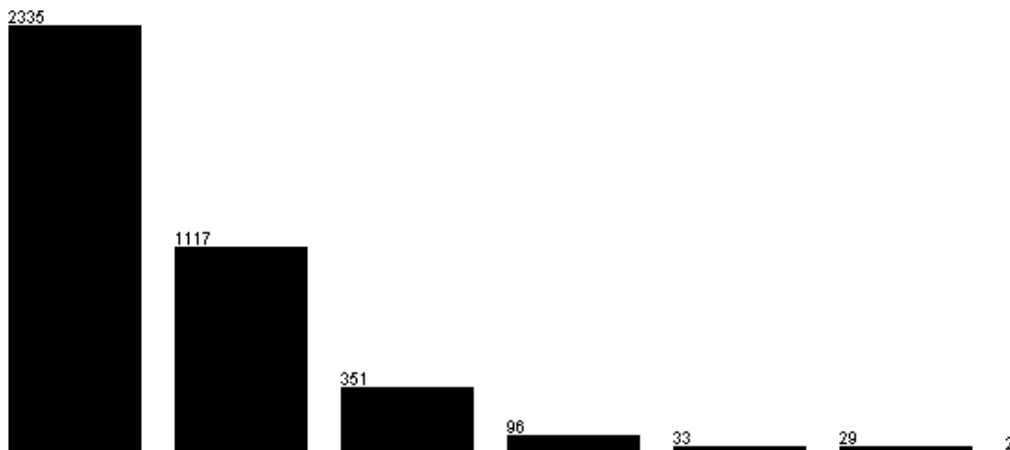

Variable id="phv00071422.v1"

**Description:** Severity/deterioration over the course of illness, followed by the raw repository SAS database field name in brackets for cross-reference to repository database [I14360] (see DIGS booklet for extended descriptions of levels). Rating

**Value:** code="1" Episodic shift

**Value:** code="2" Mild deterioration

**Value:** code="3" Moderate deterioration

**Value:** code="4" Severe deterioration

**Value:** code="5" Relatively stable

**Value:** code="6" Unknown (could not rate)

## Disorg/Inapp\_Behav

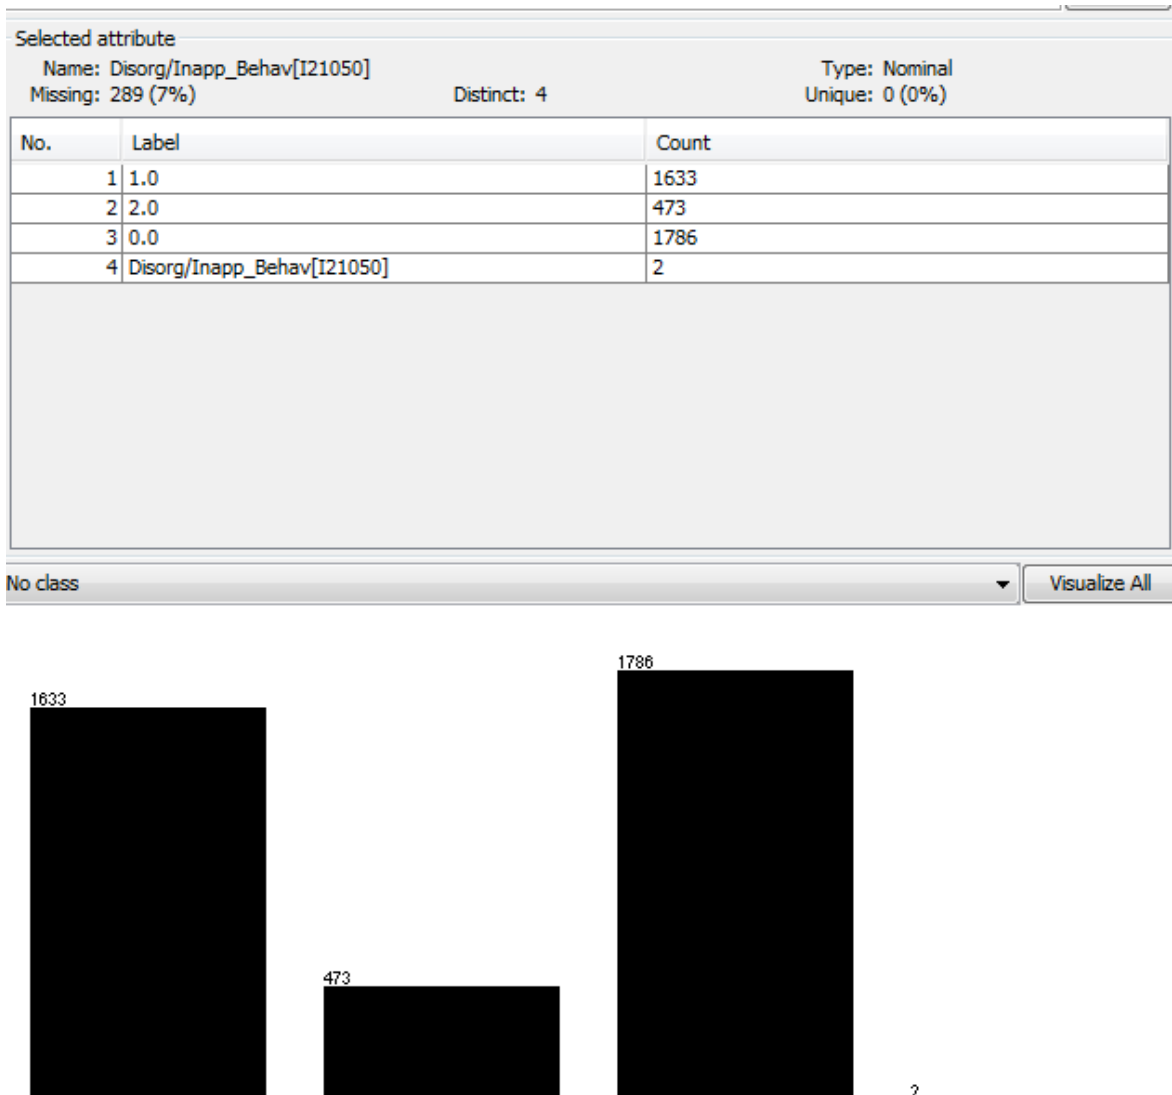

**Variable id="phv00071423.v1"**

**Description:** Disorganized or inappropriate behavior, by subject's report or by interviewer's observation (when psychotic and without other comorbid features present), followed by the raw repository SAS database field name in brackets for cross-reference to repository database [I21050]. Rating

**Value:** code="0" Absent

**Value:** code="1" Present

**Value:** code="2" Unknown (could not rate)

## Alogia

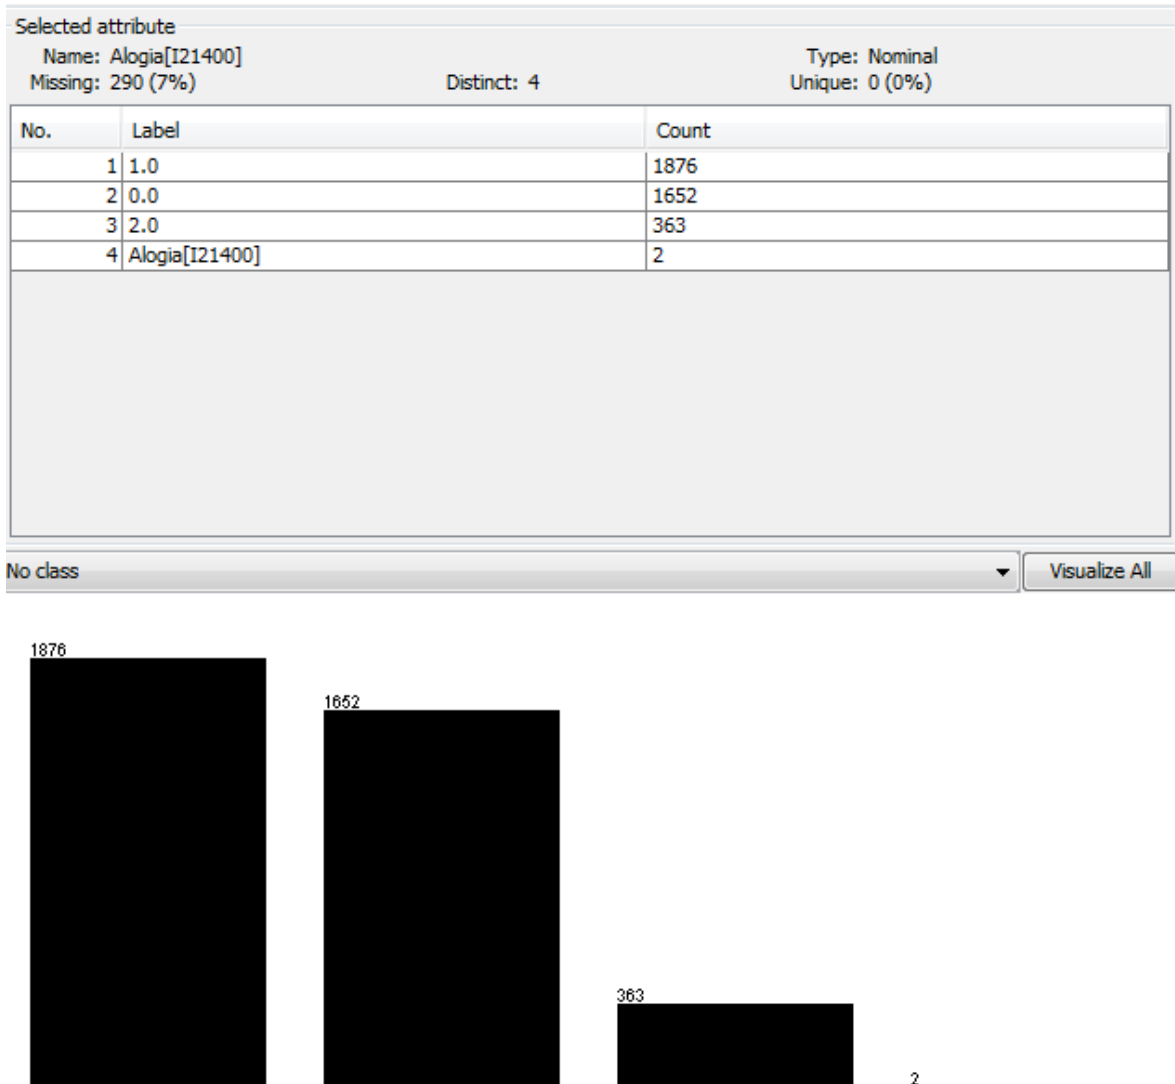

**Variable id**="phv00071424.v1"

**Description:**Alogia, by subject's report or by interviewer's observation (when psychotic and without other comorbid features present), followed by the raw repository SAS database field name in brackets for cross-reference to repository database [I21400]. Rating

**Value:** code="0" Absent

**Value:** code="1" Present

**Value:** code="2" Unknown (could not rate)

## Unable\_To\_Function\_Most\_Time\_Since\_Onset

Selected attribute

Name: Unable\_To\_Function\_Most\_Time\_Since\_Onset[I21500]      Type: Nominal  
Missing: 720 (17%)      Distinct: 4      Unique: 0 (0%)

| No. | Label                                            | Count |
|-----|--------------------------------------------------|-------|
| 1   | 1.0                                              | 3309  |
| 2   | 0.0                                              | 89    |
| 3   | 2.0                                              | 63    |
| 4   | Unable_To_Function_Most_Time_Since_Onset[I21500] | 2     |

Class: Ethnicity\_other[I220] (Nom)      Visualize All

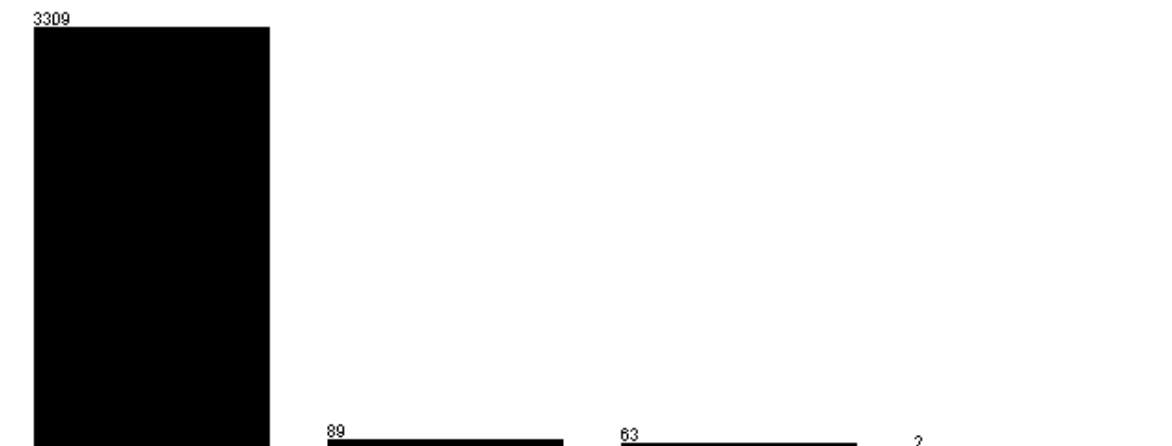

**Variable id**="phv00071425.v1"

**Description:**Unable to function most time since onset, by subject's report or by interviewer's observation (when psychotic and without other comorbid features present), followed by the raw repository SAS database field name in brackets for cross-reference to repository database [I21500]. Rating

**Value:** code="0" Absent

**Value:** code="1" Present

**Value:** code="2" Unknown (could not rate)



## Classification\_Longitud\_SZ

| Selected attribute                       |                                    |                |
|------------------------------------------|------------------------------------|----------------|
| Name: Classification_Longitud_SZ[I21560] |                                    | Type: Nominal  |
| Missing: 312 (7%)                        |                                    | Distinct: 8    |
|                                          |                                    | Unique: 0 (0%) |
| No.                                      | Label                              | Count          |
| 1                                        | 3.0                                | 3311           |
| 2                                        | 6.0                                | 91             |
| 3                                        | 2.0                                | 50             |
| 4                                        | 4.0                                | 146            |
| 5                                        | 7.0                                | 38             |
| 6                                        | 1.0                                | 214            |
| 7                                        | Classification_Longitud_SZ[I21560] | 2              |
| 8                                        | 5.0                                | 19             |

Class: Ethnicity\_other[I220] (Nom) Visualize All

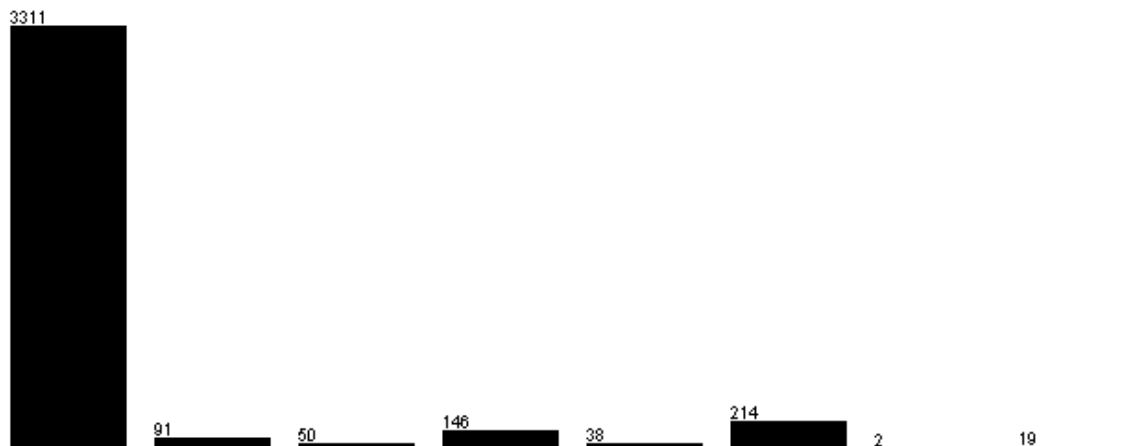

Variable id="phv00071426.v1"

**Description:** Severity pattern in terms of relapsing/remitting course, followed by the raw repository SAS database field name in brackets for cross-reference to repository database [I14360] (see DIGS booklet for extended descriptions of levels). Rating

**Value:** code="1" Episodic with interepisode residual symptoms

**Value:** code="2" Episodic with no interepisode residual symptoms

**Value:** code="3" Continuous

**Value:** code="4" Single episode in partial remission

**Value:** code="5" Single episode in full remission

**Value:** code="6" Other or unspecified pattern

**Value:** code="7" Unknown (could not rate)

## DSM4\_Delusions

Selected attribute

|                            |             |                |
|----------------------------|-------------|----------------|
| Name: DSM4_Delusions[A60a] | Distinct: 3 | Type: Nominal  |
| Missing: 261 (6%)          |             | Unique: 0 (0%) |

| No. | Label                | Count |
|-----|----------------------|-------|
| 1   | 1.0                  | 3615  |
| 2   | 0.0                  | 305   |
| 3   | DSM4_Delusions[A60a] | 2     |

Class: Ethnicity\_other[I220] (Nom) Visualize All

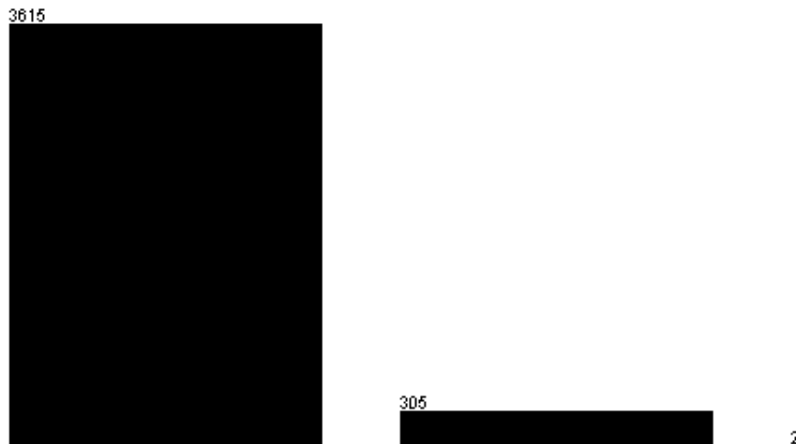

**Variable id**="phv00071427.v1"

**Description:** Interviewer rating of presence/absence of DSM4 criterion A item for criterion A item for Delusions, followed by the raw repository SAS database field name in brackets for cross-reference to repository database [A60a]. Rating

**Value:** code="0" Absent (or insufficient evidence to rate as present)

**Value:** code="1" Present

## DSM4\_Definite\_Bizarre\_Del

Selected attribute

Name: DSM4\_Definite\_Bizarre\_Del[A60b]      Type: Nominal  
Missing: 573 (14%)      Distinct: 4      Unique: 1 (0%)

| No. | Label                           | Count |
|-----|---------------------------------|-------|
| 1   | 0.0                             | 1844  |
| 2   | 1.0                             | 1763  |
| 3   | DSM4_Definite_Bizarre_Del[A60b] | 2     |
| 4   | .                               | 1     |

Class: Ethnicity\_other[I220] (Nom)      Visualize All

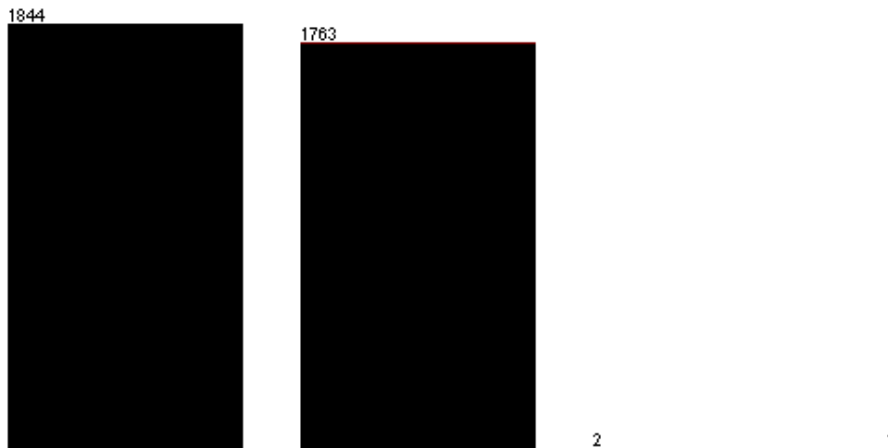

Variable id="phv00071428.v1"

**Description:** Interviewer rating of presence/absence of DSM4 criterion A item for Definite Bizarre Del, followed by the raw repository SAS database field name in brackets for cross-reference to repository database [A60b]. Rating

**Value:** code="0" Absent (or insufficient evidence to rate as present)

**Value:** code="1" Present

## DSM4\_Hallucinations

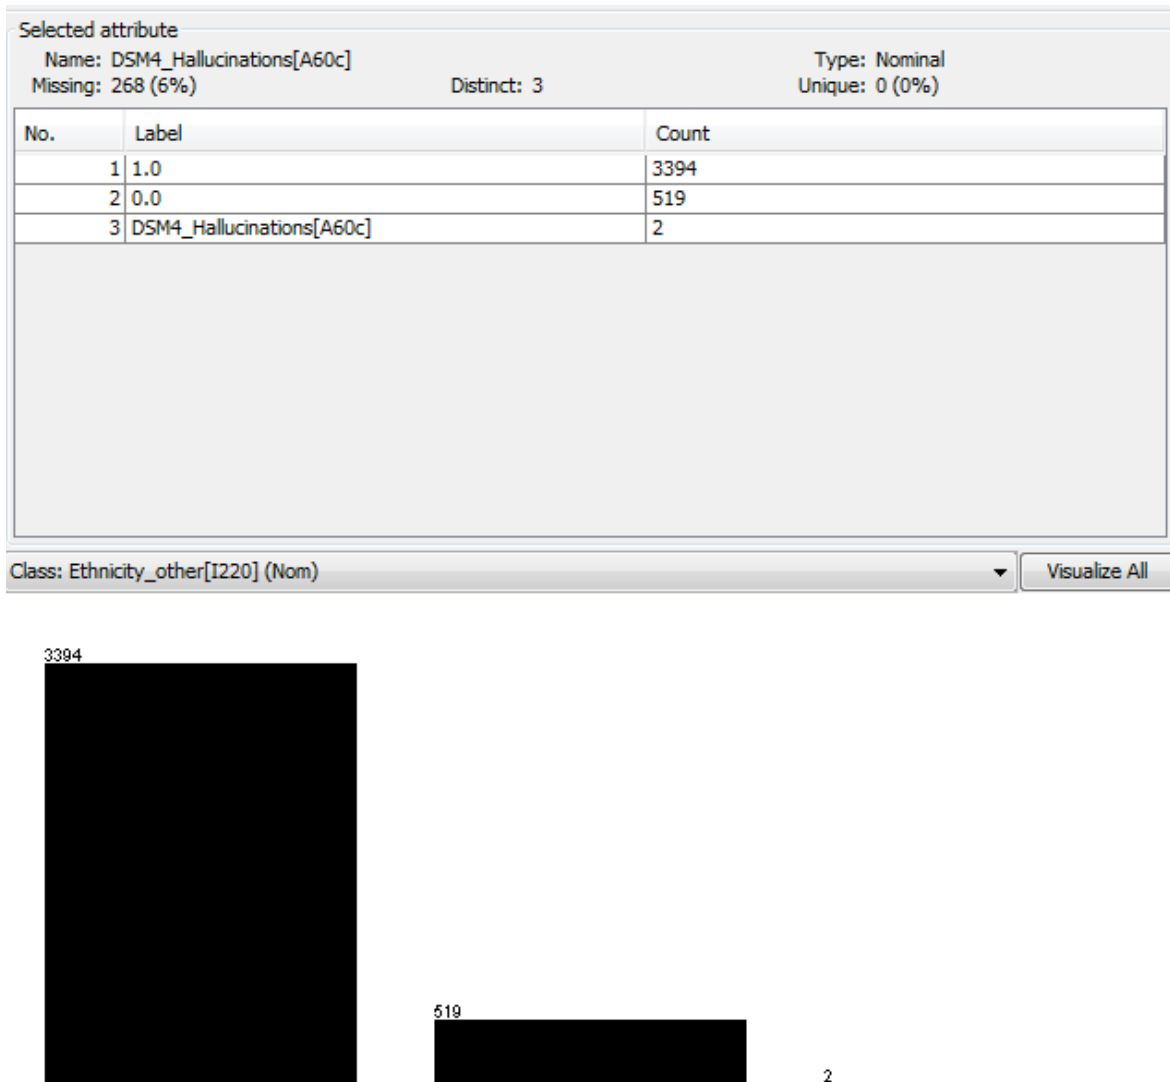

**Variable id**="phv00071429.v1"

**Description**: Interviewer rating of presence/absence of DSM4 criterion A item for Hallucinations, followed by the raw repository SAS database field name in brackets for cross-reference to repository database [A60c]. Rating

**Value**: code="0" Absent (or insufficient evidence to rate as present)

**Value**: code="1" Present

## DSM4\_2+Voices\_Commented

| Selected attribute                  |                               |                |
|-------------------------------------|-------------------------------|----------------|
| Name: DSM4_2+Voices_Commented[A60d] |                               | Type: Nominal  |
| Missing: 768 (18%)                  |                               | Distinct: 3    |
|                                     |                               | Unique: 0 (0%) |
| No.                                 | Label                         | Count          |
| 1                                   | 1.0                           | 2050           |
| 2                                   | 0.0                           | 1363           |
| 3                                   | DSM4_2+Voices_Commented[A60d] | 2              |

Class: Ethnicity\_other[I220] (Nom) Visualize All

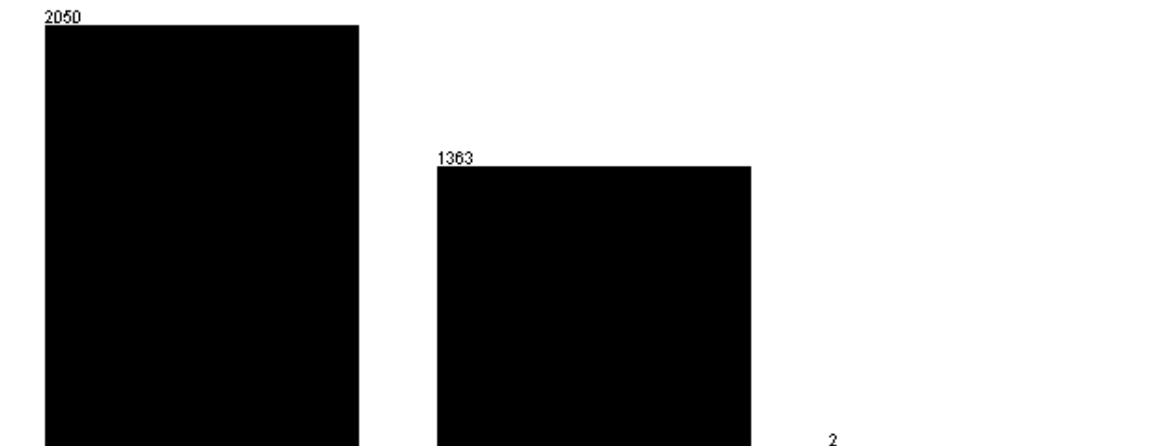

**Variable id="phv00071430.v1"**

**Description:** Interviewer rating of presence/absence of DSM4 criterion A item for 2+Voices Commented, followed by the raw repository SAS database field name in brackets for cross-reference to repository database [A60d]. Rating

**Value:** code="0" Absent (or insufficient evidence to rate as present)

**Value:** code="1" Present

## DSM4\_Disorganized\_Speech

Selected attribute

|                                      |                |
|--------------------------------------|----------------|
| Name: DSM4_Disorganized_Speech[A60e] | Type: Nominal  |
| Missing: 279 (7%)                    | Distinct: 3    |
|                                      | Unique: 0 (0%) |

| No. | Label                          | Count |
|-----|--------------------------------|-------|
| 1   | 0.0                            | 2315  |
| 2   | 1.0                            | 1587  |
| 3   | DSM4_Disorganized_Speech[A60e] | 2     |

Class: Ethnicity\_other[I220] (Nom) Visualize All

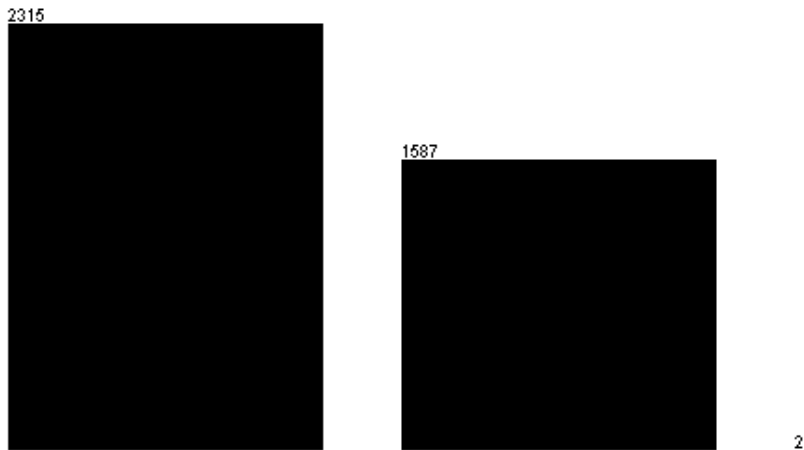

**Variable id="phv00071431.v1"**

**Description:** Interviewer rating of presence/absence of DSM4 criterion A item for Disorganized Speech, followed by the raw repository SAS database field name in brackets for cross-reference to repository database [A60e]. Rating

**Value:** code="0" Absent (or insufficient evidence to rate as present)

**Value:** code="1" Present

## DSM4\_Gross\_Disorganization

Selected attribute

Name: DSM4\_Gross\_Disorganization[A60f]      Type: Nominal  
Missing: 272 (7%)      Distinct: 3      Unique: 0 (0%)

| No. | Label                            | Count |
|-----|----------------------------------|-------|
| 1   | 1.0                              | 2244  |
| 2   | 0.0                              | 1665  |
| 3   | DSM4_Gross_Disorganization[A60f] | 2     |

Class: Ethnicity\_other[I220] (Nom)      Visualize All

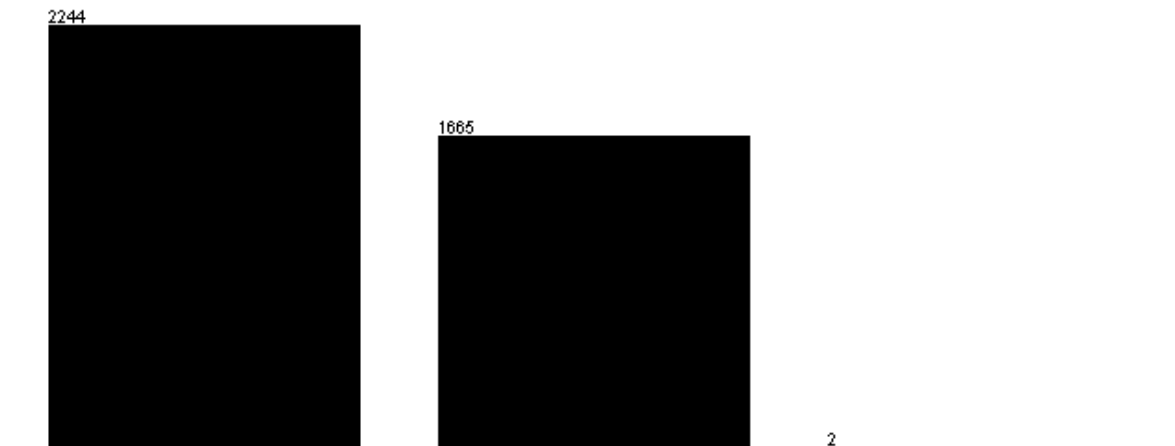

**Variable id="phv00071432.v1"**

**Description:** Interviewer rating of presence/absence of DSM4 criterion A item for Gross Disorganization, followed by the raw repository SAS database field name in brackets for cross-reference to repository database [A60f]. Rating

**Value:** code="0" Absent (or insufficient evidence to rate as present)

**Value:** code="1" Present

## DSM4\_Negative\_Sx

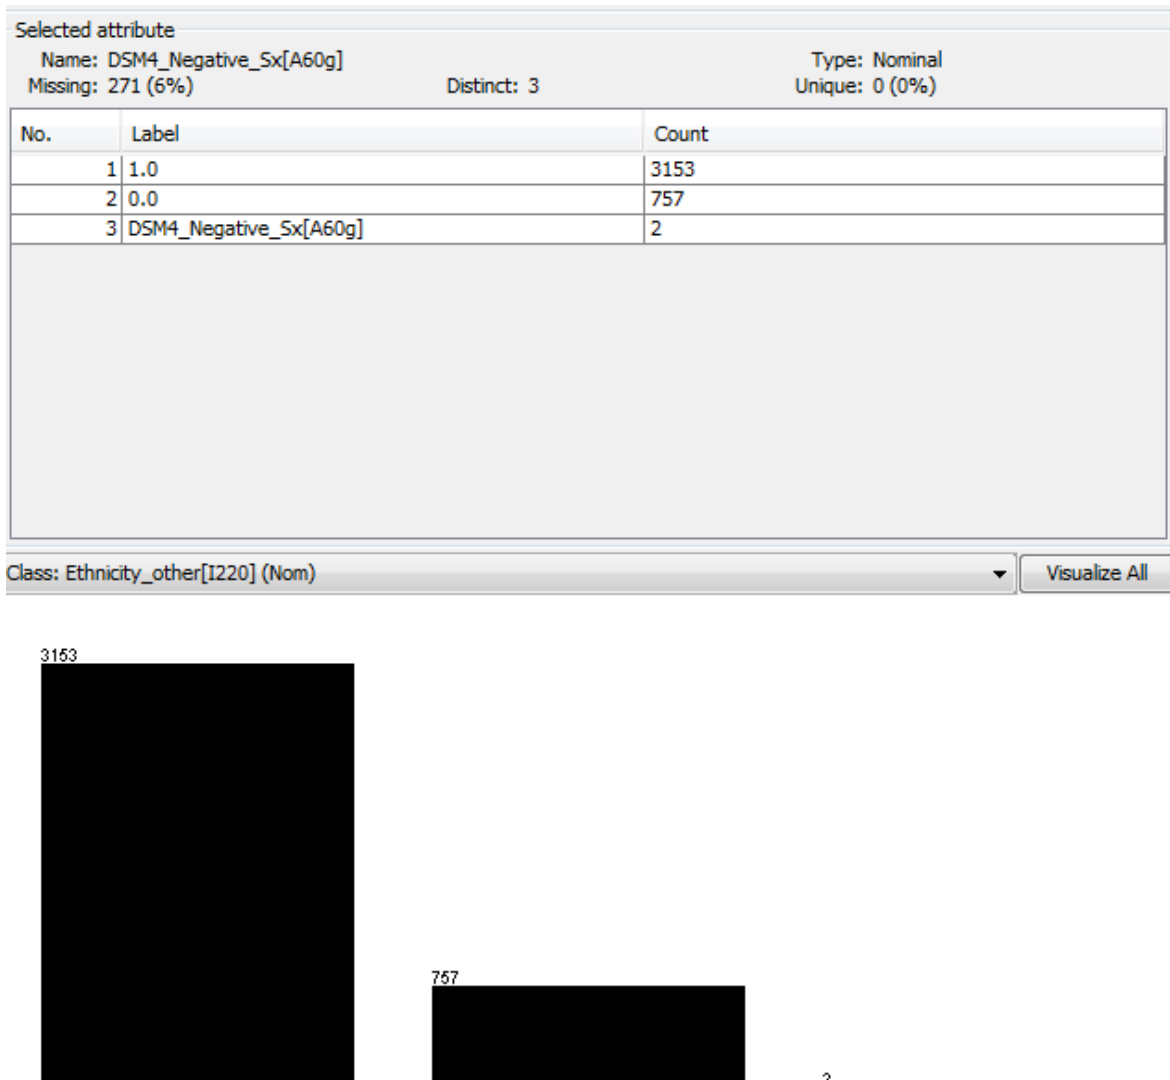

**Variable id**="phv00071433.v1"

**Description:** Interviewer rating of presence/absence of DSM4 criterion A item for Negative Symptoms, followed by the raw repository SAS database field name in brackets for cross-reference to repository database [A60g]. Rating

**Value:** code="0" Absent (or insufficient evidence to rate as present)

**Value:** code="1" Present



## Total\_DSM4\_Sx

Selected attribute

Name: Total\_DSM4\_Sx[A60h]      Type: Nominal  
 Missing: 278 (7%)      Distinct: 9      Unique: 0 (0%)

| No. | Label               | Count |
|-----|---------------------|-------|
| 1   | 5.0                 | 984   |
| 2   | 4.0                 | 877   |
| 3   | 3.0                 | 547   |
| 4   | 6.0                 | 769   |
| 5   | 2.0                 | 273   |
| 6   | 7.0                 | 351   |
| 7   | 1.0                 | 80    |
| 8   | 0.0                 | 22    |
| 9   | Total_DSM4_Sx[A60h] | 2     |

Class: Ethnicity\_other[I220] (Nom)      Visualize All

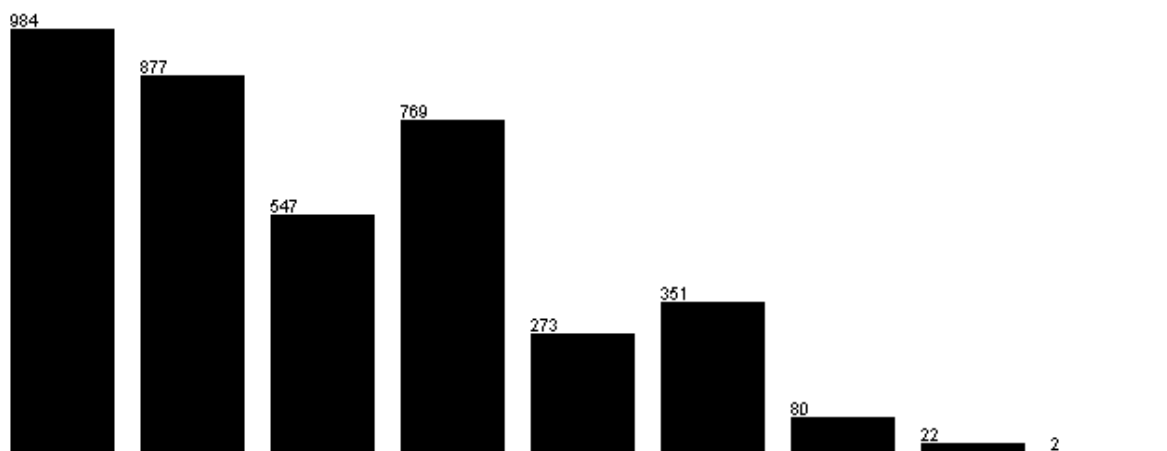

Variable id="phv00071434.v1"

**Description:**Total DSM4 Symptoms (when psychotic and without other comorbid features present), followed by the raw repository SAS database field name in brackets for cross-reference to repository database [A60h]. Count

**Value:** code="0" Sum of DSM4\_Sx equals 0

**Value:** code="1" Sum of DSM4\_Sx equals 1

**Value:** code="2" Sum of DSM4\_Sx equals 2

**Value:** code="3" Sum of DSM4\_Sx equals 3

**Value:** code="4" Sum of DSM4\_Sx equals 4

**Value:** code="5" Sum of DSM4\_Sx equals 5

**Value:** code="6" Sum of DSM4\_Sx equals 6

**Value:** code="7" Sum of DSM4\_Sx equals 7

## Psychosis\_without\_Dep\_Mania

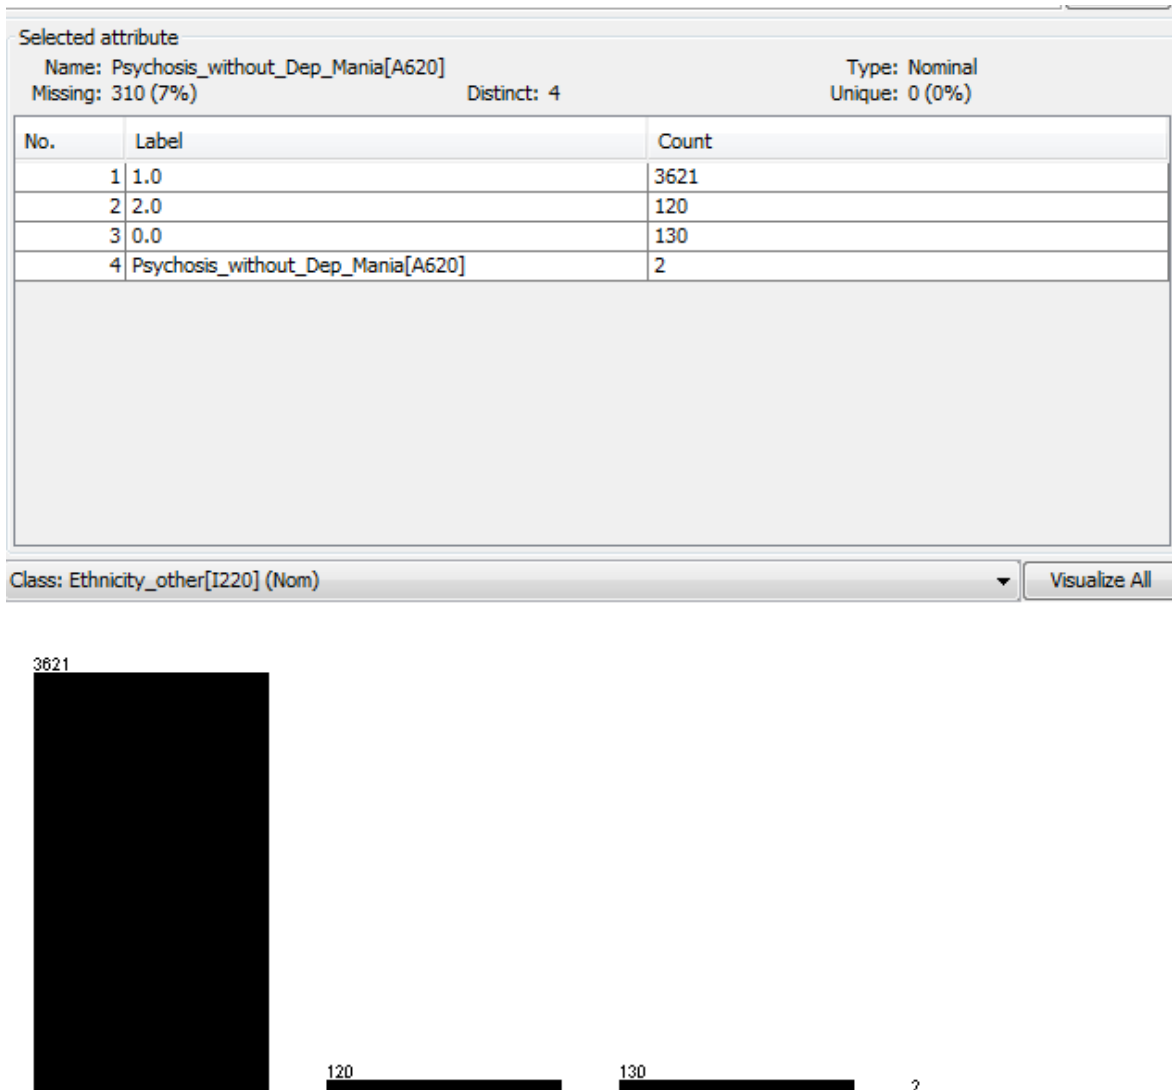

Variable id="phv00071435.v1"

**Description:** Psychosis ever present without depression or mania according to subject, followed by the raw repository SAS database field name in brackets for cross-reference to repository database [A620]. Rating

**Value:** code="0" Absent

**Value:** code="1" Present

**Value:** code="2" Unknown (could not rate)

## Psychosis\_without\_Dep\_Mania\_>=1week[A62a]

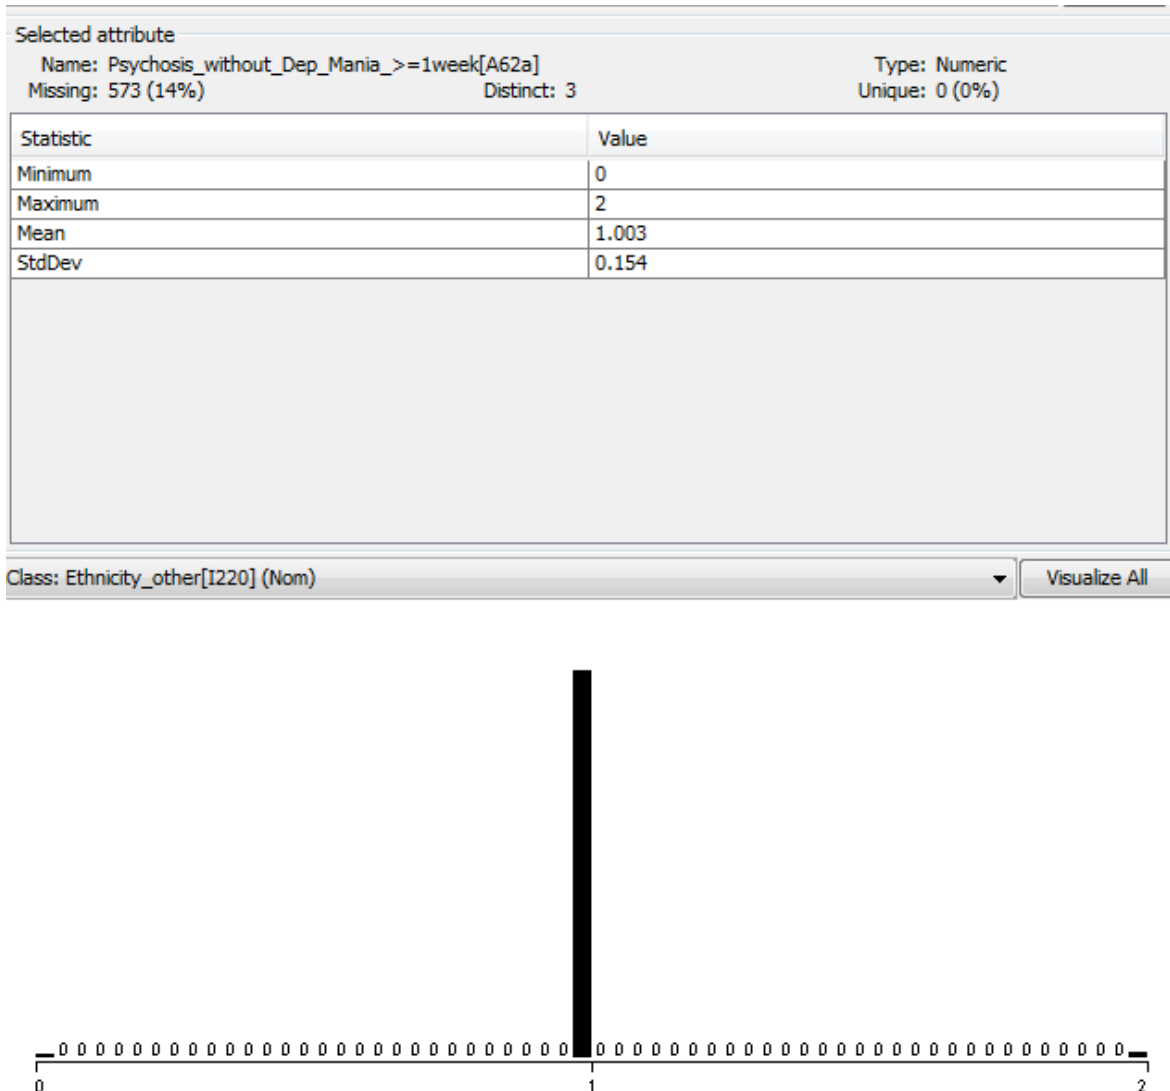

**Variable id="** phv00071436.v1"

**Description:** Psychosis ever present without depression or mania for one week or more, according to subject, followed by the raw repository SAS database field name in brackets for cross-reference to repository database [A620]. Rating

**Value:** code="0" Absent

**Value:** code="1" Present

**Value:** code="2" Unknown (could not rate)
