# Supplementary material for: Uncovering the Hidden Risk Architecture of the Schizophrenias: Confirmation in Three Independent Genome-Wide Association Studies
Source: Atypon-hosted journal article supplement (doi:10.1176/appi.ajp.2014.14040435), 2014-09-15
Supplement: appi.ajp.2014.14040435.ds004_table-s2.pdf [file appi.ajp.2014.14040435.ds004_table-s2.pdf]

**Table S2. Mapping genes targeted by SNP sets to Mental and Brain and Nervous System Disorder categories. (Information obtained from Nextbio database)**

| Gene   | Disease                       | Score | Up/Down regulated | References                   |
|--------|-------------------------------|-------|-------------------|------------------------------|
| 7SK    | Autistic disorder             | 39    | up-regulated      | (1)                          |
| 7SK    | Encephalomyelopathy           | 32    | up-regulated      | (2)                          |
| 7SK    | Mood disorder                 | 51    | down-regulated    | (3)                          |
| 7SK    | Multiple sclerosis            | 27    | up-regulated      | (4)                          |
| ABCC12 | Alzheimer's disease           | 55    | down-regulated    | (5)                          |
| ABCC12 | Dementia                      | 55    | down-regulated    | (5)                          |
| ABCC12 | Disorder of basal ganglia     | 2     | up-regulated      | (6)                          |
| ABCC12 | Hypoxia of brain              | 8     | up-regulated      | (7)                          |
| ABCC12 | Meningitis                    | 14    | up-regulated      | (8)                          |
| ABCC12 | Movement disorder             | 1     | up-regulated      | (6)                          |
| ABCC12 | Multiple sclerosis            | 37    | down-regulated    | (9) (10)                     |
| ABCC12 | Nerve injury                  | 25    | down-regulated    | (11) (12) (13)               |
| ABCC12 | Neuropathy                    | 14    | down-regulated    | (11) (14)                    |
| ABCC12 | Parkinson's disease           | 10    | up-regulated      | (6)                          |
| ABCC12 | Psychotic disorder            | 47    | up-regulated      | (15) (16) (17)               |
| ABCC12 | Schizophrenia                 | 47    | up-regulated      | (15) (16) (17)               |
| ARPC5L | Alzheimer's disease           | 26    | down-regulated    | (18)                         |
| ARPC5L | Amyotrophic lateral sclerosis | 14    | down-regulated    | (19)                         |
| ARPC5L | Anxiety disorder              | 73    | up-regulated      | (20)                         |
| ARPC5L | Autistic disorder             | 45    | down-regulated    | (21) (22) (23)               |
| ARPC5L | Cerebrovascular disease       | 45    | up-regulated      | (24)                         |
| ARPC5L | Chronic fatigue syndrome      | 100   | down-regulated    | (25)                         |
| ARPC5L | Dementia                      | 26    | down-regulated    | (18)                         |
| ARPC5L | Developmental mental disorder | 41    | up-regulated      | (22)                         |
| ARPC5L | Disorder of basal ganglia     | 74    | down-regulated    | (26) (27) (28) (29) (30) (6) |
| ARPC5L | Disorder of brain             | 38    | up-regulated      | (31) (32)                    |
| ARPC5L | Huntington's disease          | 85    | down-regulated    | (27) (29)                    |
| ARPC5L | Meningitis                    | 69    | down-regulated    | (33) (8) (34) (35)           |
| ARPC5L | Mental retardation            | 38    | up-regulated      | (22)                         |
| ARPC5L | Motor neuron disease          | 28    | up-regulated      | (36) (19)                    |
| ARPC5L | Movement disorder             | 71    | down-regulated    | (26) (27) (28) (29) (30) (6) |
| ARPC5L | Nerve injury                  | 1     | down-regulated    | (19)                         |
| ARPC5L | Parkinson's disease           | 50    | down-regulated    | (26) (28) (30) (6)           |

|           |                           |    |                |                                 |
|-----------|---------------------------|----|----------------|---------------------------------|
| ARPC5L    | Prion disease             | 26 | down-regulated | (37)                            |
| ARPC5L    | Psychotic disorder        | 36 | down-regulated | (15) (38)                       |
| ARPC5L    | Schizophrenia             | 36 | down-regulated | (15) (38)                       |
| ATP8A2    | Alzheimer's disease       | 44 | down-regulated | (39) (18) (5) (40)              |
| ATP8A2    | Autistic disorder         | 23 | up-regulated   | (1)                             |
| ATP8A2    | Cerebrovascular disease   | 29 | down-regulated | (41)                            |
| ATP8A2    | Dementia                  | 43 | down-regulated | (39) (18) (5) (40)              |
| ATP8A2    | Disorder of basal ganglia | 84 | down-regulated | (10) (26) (42) (28)<br>(29) (6) |
| ATP8A2    | Encephalitis              | 46 | down-regulated | (43)                            |
| ATP8A2    | Encephalomyelopathy       | 37 | up-regulated   | (44)                            |
| ATP8A2    | Huntington's disease      | 80 | down-regulated | (27) (29)                       |
| ATP8A2    | Hypoxia of brain          | 32 | down-regulated | (41)                            |
| ATP8A2    | Meningitis                | 55 | up-regulated   | (33) (8) (35) (45)              |
| ATP8A2    | Movement disorder         | 81 | down-regulated | (10) (26) (42) (28)<br>(29) (6) |
| ATP8A2    | Nerve injury              | 31 | up-regulated   | (12)                            |
| ATP8A2    | Neuropathy                | 33 | down-regulated | (46) (47)                       |
| ATP8A2    | Parkinson's disease       | 84 | down-regulated | (10) (48) (26) (42)<br>(28) (6) |
| ATP8A2    | Prion disease             | 40 | down-regulated | (49)                            |
| ATP8A2    | Psychotic disorder        | 30 | 0.0001 p-value | (38)                            |
| ATP8A2    | Schizophrenia             | 30 | 0.0001 p-value | (38)                            |
| ATP8A2    | Sleep disorder            | 34 | down-regulated | (50)                            |
| C14orf102 | Alzheimer's disease       | 48 | up-regulated   | (51) (5) (52)                   |
| C14orf102 | Anxiety disorder          | 17 | up-regulated   | (20)                            |
| C14orf102 | Autistic disorder         | 27 | up-regulated   | (1)                             |
| C14orf102 | Cerebrovascular disease   | 20 | down-regulated | (41)                            |
| C14orf102 | Dementia                  | 48 | up-regulated   | (51) (5) (52)                   |
| C14orf102 | Disorder of basal ganglia | 18 | up-regulated   | (10) (26) (27)                  |
| C14orf102 | Huntington's disease      | 24 | down-regulated | (10) (27)                       |
| C14orf102 | Hypoxia of brain          | 22 | down-regulated | (41)                            |
| C14orf102 | Meningitis                | 51 | up-regulated   | (8) (53)                        |
| C14orf102 | Movement disorder         | 15 | up-regulated   | (10) (26) (27)                  |
| C14orf102 | Neural tube defect        | 42 | down-regulated | (54)                            |
| C14orf102 | Neuropathy                | 14 | down-regulated | (55) (47)                       |
| C14orf102 | Parkinson's disease       | 8  | up-regulated   | (26)                            |
| C14orf102 | Psychotic disorder        | 20 | 0.0002 p-value | (38)                            |
| C14orf102 | Schizophrenia             | 21 | 0.0002 p-value | (38)                            |
| C14orf102 | Sleep disorder            | 42 | down-regulated | (56)                            |

|          |                                          |    |                |                     |
|----------|------------------------------------------|----|----------------|---------------------|
| C20orf78 | Anxiety disorder                         | 32 | down-regulated | (20)                |
| C20orf78 | Disorder of basal ganglia                | 42 | down-regulated | (29)                |
| C20orf78 | Huntington's disease                     | 55 | down-regulated | (29)                |
| C20orf78 | Movement disorder                        | 39 | down-regulated | (29)                |
| C20orf78 | Psychotic disorder                       | 35 | up-regulated   | (57) (38)           |
| C20orf78 | Schizophrenia                            | 35 | up-regulated   | (57) (38)           |
| C4orf37  | Autistic disorder                        | 3  | up-regulated   | (23)                |
| C4orf37  | Meningitis                               | 10 | up-regulated   | (8)                 |
| C4orf37  | Multiple sclerosis                       | 14 | up-regulated   | (9)                 |
| C4orf37  | Psychotic disorder                       | 1  | down-regulated | (16)                |
| C4orf37  | Schizophrenia                            | 1  | down-regulated | (16)                |
| C4orf37  | Sleep disorder                           | 16 | up-regulated   | (58)                |
| C6orf138 | Amnestic disorder                        | 88 | up-regulated   | (59)                |
| C6orf138 | Cerebrovascular disease                  | 48 | down-regulated | (41)                |
| C6orf138 | Disorder of basal ganglia                | 62 | down-regulated | (10)                |
| C6orf138 | Huntington's disease                     | 54 | down-regulated | (10)                |
| C6orf138 | Hypoxia of brain                         | 51 | down-regulated | (41)                |
| C6orf138 | Meningitis                               | 75 | down-regulated | (8) (45)            |
| C6orf138 | Movement disorder                        | 59 | down-regulated | (10)                |
| C6orf138 | Multiple sclerosis                       | 71 | down-regulated | (10) (4)            |
| C6orf138 | Nerve injury                             | 46 | down-regulated | (60) (12) (61)      |
| C6orf138 | Neuropathy                               | 83 | down-regulated | (47)                |
| C6orf138 | Parkinson's disease                      | 63 | down-regulated | (10)                |
| CHST9    | Alzheimer's disease                      | 21 | up-regulated   | (5) (52)            |
| CHST9    | Amnestic disorder                        | 79 | down-regulated | (59)                |
| CHST9    | Amyotrophic lateral sclerosis            | 37 | down-regulated | (10)                |
| CHST9    | Dementia                                 | 21 | up-regulated   | (5) (52)            |
| CHST9    | Disorder of basal ganglia                | 33 | up-regulated   | (10) (29)           |
| CHST9    | Huntington's disease                     | 47 | up-regulated   | (10) (29)           |
| CHST9    | Meningitis                               | 31 | up-regulated   | (8)                 |
| CHST9    | Motor neuron disease                     | 46 | down-regulated | (10) (62)           |
| CHST9    | Movement disorder                        | 30 | up-regulated   | (10) (29)           |
| CHST9    | Multiple sclerosis                       | 56 | up-regulated   | (63) (64) (65)      |
| CHST9    | Nerve injury                             | 24 | down-regulated | (11) (12) (13)      |
| CHST9    | Neuropathy                               | 11 | down-regulated | (11)                |
| CHST9    | Psychotic disorder                       | 69 | down-regulated | (38) (66)           |
| CHST9    | Schizophrenia                            | 69 | down-regulated | (38) (66)           |
| CSMD1    | Alzheimer's disease                      | 38 | 8.7E-6 p-value | (40) (67) (68) (69) |
| CSMD1    | Attention deficit hyperactivity disorder | 35 |                | (70)                |
| CSMD1    | Autistic disorder                        | 38 | down-regulated | (71) (23)           |
| CSMD1    | Cerebrovascular disease                  | 10 | 5.4E-5 p-value | (72)                |

|       |                           |    |                |                               |
|-------|---------------------------|----|----------------|-------------------------------|
| CSMD1 | Dementia                  | 37 | 8.7E-6 p-value | (40) (67) (68) (69)           |
| CSMD1 | Disorder of basal ganglia | 49 | down-regulated | (10) (26) (28) (29) (73)      |
| CSMD1 | Huntington's disease      | 33 | down-regulated | (10) (29)                     |
| CSMD1 | Hypoxia of brain          | 13 | 5.4E-5 p-value | (72)                          |
| CSMD1 | Meningitis                | 28 | up-regulated   | (33) (8)                      |
| CSMD1 | Mood disorder             | 38 | 3.6E-6 p-value | (74) (75) (76) (77)           |
| CSMD1 | Movement disorder         | 46 | down-regulated | (10) (26) (28) (29) (73)      |
| CSMD1 | Multiple sclerosis        | 45 | up-regulated   | (10) (64) (78)                |
| CSMD1 | Nerve injury              | 23 | down-regulated | (11) (12)                     |
| CSMD1 | Neuropathy                | 29 | down-regulated | (60) (11) (47)                |
| CSMD1 | Parkinson's disease       | 49 | down-regulated | (10) (26) (28) (73)           |
| CSMD1 | Psychotic disorder        | 71 | down-regulated | (79) (38) (66) (80)           |
| CSMD1 | Schizophrenia             | 71 | down-regulated | (79) (38) (66) (80)           |
| DKK4  | Autistic disorder         | 33 | up-regulated   | (23)                          |
| DKK4  | Disorder of basal ganglia | 1  | up-regulated   | (6)                           |
| DKK4  | Encephalomyelopathy       | 3  | up-regulated   | (2)                           |
| DKK4  | Meningitis                | 28 | down-regulated | (8)                           |
| DKK4  | Mood disorder             | 43 | down-regulated | (17) (3)                      |
| DKK4  | Movement disorder         | 1  | up-regulated   | (6)                           |
| DKK4  | Multiple sclerosis        | 4  | up-regulated   | (81)                          |
| DUSP4 | Alzheimer's disease       | 1  | down-regulated | (5) (52)                      |
| DUSP4 | Anxiety disorder          | 38 | up-regulated   | (20)                          |
| DUSP4 | Cerebrovascular disease   | 6  | up-regulated   | (41)                          |
| DUSP4 | Disorder of basal ganglia | 38 | down-regulated | (48) (26) (27) (29) (6)       |
| DUSP4 | Disorder of brain         | 46 | down-regulated | (32)                          |
| DUSP4 | Encephalitis              | 29 | up-regulated   | (82)                          |
| DUSP4 | Encephalomyelopathy       | 31 | down-regulated | (83)                          |
| DUSP4 | Huntington's disease      | 46 | down-regulated | (27) (29)                     |
| DUSP4 | Hypoxia of brain          | 16 | up-regulated   | (84) (41)                     |
| DUSP4 | Meningitis                | 53 | up-regulated   | (8) (35) (53) (45)            |
| DUSP4 | Mood disorder             | 23 | down-regulated | (85) (86)                     |
| DUSP4 | Movement disorder         | 35 | down-regulated | (48) (26) (27) (29) (6)       |
| DUSP4 | Multiple sclerosis        | 11 | down-regulated | (63) (65)                     |
| DUSP4 | Nerve injury              | 20 | up-regulated   | (12) (87) (88) (61) (13) (89) |

|       |                           |     |                 |                               |
|-------|---------------------------|-----|-----------------|-------------------------------|
| DUSP4 | Neural tube defect        | 29  | down-regulated  | (54)                          |
| DUSP4 | Neuropathy                | 17  | down-regulated  | (60) (90) (88) (47) (89)      |
| DUSP4 | Paralytic syndrome        | 24  | up-regulated    | (91)                          |
| DUSP4 | Parkinson's disease       | 12  | down-regulated  | (48) (26) (6)                 |
| DUSP4 | Psychotic disorder        | 22  | down-regulated  | (15) (66)                     |
| DUSP4 | Schizophrenia             | 22  | down-regulated  | (15) (66)                     |
| DUSP4 | Sleep disorder            | 91  | up-regulated    | (56) (50) (58)                |
| DUSP4 | Spinocerebellar ataxia    | 51  | down-regulated  | (83)                          |
| EML5  | Alzheimer's disease       | 11  | down-regulated  | (52)                          |
| EML5  | Amnestic disorder         | 45  | up-regulated    | (92)                          |
| EML5  | Dementia                  | 11  | down-regulated  | (52)                          |
| EML5  | Disorder of basal ganglia | 66  | up-regulated    | (10) (26) (29)                |
| EML5  | Huntington's disease      | 78  | up-regulated    | (10) (29)                     |
| EML5  | Meningitis                | 73  | down-regulated  | (8) (93) (35) (53) (45)       |
| EML5  | Movement disorder         | 63  | up-regulated    | (10) (26) (29)                |
| EML5  | Nerve injury              | 77  | down-regulated  | (60) (11) (12) (94) (95)      |
| EML5  | Neuropathy                | 73  | down-regulated  | (60) (11) (94)                |
| EML5  | Parkinson's disease       | 30  | up-regulated    | (26)                          |
| EML5  | Psychotic disorder        | 79  | 9.5E-7 p-value  | (38) (96)                     |
| EML5  | Schizophrenia             | 79  | 9.5E-7 p-value  | (38) (96)                     |
| EML5  | Sleep disorder            | 76  | down-regulated  | (56) (50)                     |
| EVI5  | Amnestic disorder         | 65  | up-regulated    | (97)                          |
| EVI5  | Anxiety disorder          | 14  | up-regulated    | (98)                          |
| EVI5  | Autistic disorder         | 29  | up-regulated    | (71) (1)                      |
| EVI5  | Cerebral palsy            | 17  | up-regulated    | (99)                          |
| EVI5  | Disorder of basal ganglia | 34  | up-regulated    | (10) (48) (26) (27) (29)      |
| EVI5  | Huntington's disease      | 39  | up-regulated    | (10) (27) (29)                |
| EVI5  | Meningitis                | 49  | up-regulated    | (100) (33) (8) (34) (35) (45) |
| EVI5  | Mood disorder             | 25  | down-regulated  | (101) (3)                     |
| EVI5  | Motor neuron disease      | 3   | down-regulated  | (36) (62)                     |
| EVI5  | Movement disorder         | 31  | up-regulated    | (10) (48) (26) (27) (29)      |
| EVI5  | Multiple sclerosis        | 100 | 6.5E-12 p-value | (102) (103) (104)             |
| EVI5  | Nerve injury              | 72  | up-regulated    | (12) (88) (105) (106)         |

|        |                           |    |                |                     |
|--------|---------------------------|----|----------------|---------------------|
|        |                           |    |                | (107) (95)          |
| EVI5   | Neural tube defect        | 25 | up-regulated   | (54)                |
| EVI5   | Neuropathy                | 4  | up-regulated   | (90) (88)           |
| EVI5   | Parkinson's disease       | 23 | down-regulated | (48) (26)           |
| EVI5   | Psychotic disorder        | 61 | up-regulated   | (108) (38) (17)     |
| EVI5   | Schizophrenia             | 62 | up-regulated   | (108) (38) (17)     |
| EVI5   | Sleep disorder            | 42 | up-regulated   | (56) (58)           |
| FAM69A | Alzheimer's disease       | 1  | down-regulated | (18)                |
| FAM69A | Autistic disorder         | 1  | down-regulated | (71)                |
| FAM69A | Cerebral palsy            | 32 | down-regulated | (99)                |
| FAM69A | Dementia                  | 1  | down-regulated | (18)                |
| FAM69A | Disorder of basal ganglia | 1  | up-regulated   | (28) (109)          |
| FAM69A | Disorder of brain         | 29 | up-regulated   | (31) (32)           |
| FAM69A | Encephalitis              | 44 | down-regulated | (110) (82)          |
| FAM69A | Encephalomyelitis         | 29 | down-regulated | (110)               |
| FAM69A | Encephalomyelopathy       | 9  | down-regulated | (91) (110)          |
| FAM69A | Meningitis                | 7  | down-regulated | (33)                |
| FAM69A | Mood disorder             | 1  | down-regulated | (85)                |
| FAM69A | Motor neuron disease      | 1  | up-regulated   | (62)                |
| FAM69A | Movement disorder         | 1  | up-regulated   | (28) (109)          |
| FAM69A | Multiple sclerosis        | 90 | 0.8E-7 p-value | (102) (103)         |
| FAM69A | Myoneural disorder        | 40 | up-regulated   | (111)               |
| FAM69A | Nerve injury              | 17 | down-regulated | (112) (87) (95)     |
| FAM69A | Neuropathy                | 11 | up-regulated   | (91) (111)          |
| FAM69A | Paralytic syndrome        | 20 | down-regulated | (91)                |
| FAM69A | Parkinson's disease       | 5  | up-regulated   | (28) (109)          |
| FAM69A | Prion disease             | 6  | down-regulated | (113)               |
| FAM69A | Psychotic disorder        | 51 | 0.0E-6 p-value | (108) (38)          |
| FAM69A | Schizophrenia             | 51 | 0.0E-6 p-value | (108) (38)          |
| FAM69A | Sleep disorder            | 39 | down-regulated | (56) (50)           |
| FOXR2  | Nerve injury              | 83 | up-regulated   | (11) (89)           |
| FOXR2  | Neuropathy                | 86 | up-regulated   | (11) (89)           |
| GOLGA1 | Alzheimer's disease       | 24 | 0.0007 p-value | (40)                |
| GOLGA1 | Autistic disorder         | 44 | down-regulated | (23)                |
| GOLGA1 | Dementia                  | 24 | 0.0007 p-value | (40)                |
| GOLGA1 | Disorder of basal ganglia | 55 | up-regulated   | (10) (26) (28) (29) |
| GOLGA1 | Disorder of brain         | 50 | down-regulated | (31)                |
| GOLGA1 | Encephalomyelopathy       | 51 | down-regulated | (114)               |
| GOLGA1 | Huntington's disease      | 52 | up-regulated   | (29)                |
| GOLGA1 | Meningitis                | 51 | down-regulated | (100)               |
| GOLGA1 | Movement disorder         | 52 | up-regulated   | (10) (26) (28) (29) |
| GOLGA1 | Multiple sclerosis        | 33 | down-regulated | (81)                |

|        |                           |    |                |                           |
|--------|---------------------------|----|----------------|---------------------------|
| GOLGA1 | Nerve injury              | 66 | down-regulated | (12) (89)                 |
| GOLGA1 | Neuropathy                | 35 | down-regulated | (47) (89)                 |
| GOLGA1 | Paralytic syndrome        | 61 | up-regulated   | (91)                      |
| GOLGA1 | Parkinson's disease       | 55 | up-regulated   | (10) (26) (28)            |
| GOLGA1 | Psychotic disorder        | 50 | 0.0002 p-value | (38)                      |
| GOLGA1 | Schizophrenia             | 51 | 0.0002 p-value | (38)                      |
| GOLGA1 | Sleep disorder            | 91 | down-regulated | (50)                      |
| GP2    | Alzheimer's disease       | 1  | up-regulated   | (18)                      |
| GP2    | Amnestic disorder         | 20 | up-regulated   | (115)                     |
| GP2    | Anxiety disorder          | 1  | down-regulated | (20)                      |
| GP2    | Dementia                  | 1  | up-regulated   | (18)                      |
| GP2    | Disorder of basal ganglia | 1  | down-regulated | (27)                      |
| GP2    | Huntington's disease      | 1  | down-regulated | (27)                      |
| GP2    | Meningitis                | 9  | down-regulated | (8) (34)                  |
| GP2    | Movement disorder         | 1  | down-regulated | (27)                      |
| GP2    | Nerve injury              | 35 | down-regulated | (88)                      |
| GP2    | Neuropathy                | 38 | down-regulated | (88)                      |
| GP2    | Psychotic disorder        | 12 | up-regulated   | (17)                      |
| GP2    | Schizophrenia             | 12 | up-regulated   | (17)                      |
| GPR119 | Alzheimer's disease       | 59 | 7.8E-5 p-value | (116)                     |
| GPR119 | Anxiety disorder          | 48 | down-regulated | (20)                      |
| GPR119 | Dementia                  | 58 | 7.8E-5 p-value | (116)                     |
| GPR119 | Nerve injury              | 27 | up-regulated   | (11)                      |
| GPR119 | Neuropathy                | 29 | up-regulated   | (11)                      |
| HACE1  | Alzheimer's disease       | 1  | down-regulated | (39) (5) (40) (69)        |
| HACE1  | Autistic disorder         | 1  | up-regulated   | (21)                      |
| HACE1  | Cerebrovascular disease   | 1  | up-regulated   | (24)                      |
| HACE1  | Dementia                  | 1  | down-regulated | (39) (5) (40) (69)        |
| HACE1  | Disorder of basal ganglia | 11 | down-regulated | (117) (26) (27) (28) (29) |
| HACE1  | Encephalitis              | 1  | down-regulated | (82)                      |
| HACE1  | Huntington's disease      | 16 | down-regulated | (117) (27) (29)           |
| HACE1  | Meningitis                | 3  | up-regulated   | (8) (45)                  |
| HACE1  | Mood disorder             | 1  | 0.0003 p-value | (74)                      |
| HACE1  | Movement disorder         | 8  | down-regulated | (117) (26) (27) (28) (29) |
| HACE1  | Multiple sclerosis        | 1  | up-regulated   | (78)                      |
| HACE1  | Nerve injury              | 6  | up-regulated   | (12) (88) (105) (107)     |
| HACE1  | Neuropathy                | 1  | down-regulated | (60) (88)                 |
| HACE1  | Parkinson's disease       | 1  | down-regulated | (26) (28)                 |
| HACE1  | Psychotic disorder        | 7  | 0.5E-6 p-value | (108)                     |

|       |                                           |    |                |                                 |
|-------|-------------------------------------------|----|----------------|---------------------------------|
| HACE1 | Schizophrenia                             | 7  | 0.5E-6 p-value | (108)                           |
| HACE1 | Sleep disorder                            | 8  | up-regulated   | (58)                            |
| HPGDS | Alzheimer's disease                       | 37 | 4.0E-5 p-value | (118)                           |
| HPGDS | Amnestic disorder                         | 49 | up-regulated   | (115) (59)                      |
| HPGDS | Anxiety disorder                          | 27 | up-regulated   | (20)                            |
| HPGDS | Cerebral palsy                            | 54 | up-regulated   | (99)                            |
| HPGDS | Childhood disorder of conduct and emotion | 59 | down-regulated | (119) (120)                     |
| HPGDS | Dementia                                  | 37 | 4.0E-5 p-value | (118)                           |
| HPGDS | Disorder of basal ganglia                 | 37 | down-regulated | (48) (27) (121)                 |
| HPGDS | Disorder of brain                         | 44 | down-regulated | (122)                           |
| HPGDS | Huntington's disease                      | 42 | down-regulated | (27) (121)                      |
| HPGDS | Meningitis                                | 23 | down-regulated | (33)                            |
| HPGDS | Movement disorder                         | 34 | down-regulated | (48) (27) (121)                 |
| HPGDS | Multiple sclerosis                        | 13 | up-regulated   | (78)                            |
| HPGDS | Nerve injury                              | 78 | up-regulated   | (112) (12) (87) (95) (13) (89)  |
| HPGDS | Neuropathy                                | 43 | down-regulated | (60) (90) (46) (89)             |
| HPGDS | Parkinson's disease                       | 29 | down-regulated | (48)                            |
| HPGDS | Prion disease                             | 75 | up-regulated   | (37) (113)                      |
| HPGDS | Psychotic disorder                        | 16 | 0.0003 p-value | (38)                            |
| HPGDS | Schizophrenia                             | 16 | 0.0003 p-value | (38)                            |
| HPGDS | Sleep disorder                            | 45 | down-regulated | (50)                            |
| IGSF1 | Amnestic disorder                         | 39 | up-regulated   | (92) (97)                       |
| IGSF1 | Autistic disorder                         | 20 | up-regulated   | (23) (1)                        |
| IGSF1 | Disorder of basal ganglia                 | 60 | up-regulated   | (10) (48) (42) (27) (28) (29)   |
| IGSF1 | Disorder of brain                         | 16 | up-regulated   | (32)                            |
| IGSF1 | Encephalitis                              | 47 | down-regulated | (43)                            |
| IGSF1 | Encephalomyelopathy                       | 20 | up-regulated   | (2)                             |
| IGSF1 | Epilepsy                                  | 14 | up-regulated   | (123)                           |
| IGSF1 | Huntington's disease                      | 70 | up-regulated   | (10) (27) (29)                  |
| IGSF1 | Meningitis                                | 31 | up-regulated   | (33) (8)                        |
| IGSF1 | Mood disorder                             | 6  | up-regulated   | (124)                           |
| IGSF1 | Motor neuron disease                      | 21 | up-regulated   | (62)                            |
| IGSF1 | Movement disorder                         | 57 | up-regulated   | (10) (48) (42) (27) (28) (29)   |
| IGSF1 | Multiple sclerosis                        | 1  | up-regulated   | (9)                             |
| IGSF1 | Nerve injury                              | 48 | down-regulated | (112) (11) (12) (87) (107) (89) |



|        |                           |    |                |                                 |
|--------|---------------------------|----|----------------|---------------------------------|
| IGSF1  | Neuropathy                | 32 | down-regulated | (11) (88) (47) (89)             |
| IGSF1  | Parkinson's disease       | 29 | down-regulated | (48) (42) (28)                  |
| IGSF1  | Psychotic disorder        | 17 | up-regulated   | (38) (17)                       |
| IGSF1  | Schizophrenia             | 18 | up-regulated   | (38) (17)                       |
| IGSF1  | Sleep disorder            | 84 | down-regulated | (56) (58)                       |
| ITFG1  | Alzheimer's disease       | 44 | down-regulated | (18) (5) (52)                   |
| ITFG1  | Autistic disorder         | 12 | down-regulated | (1)                             |
| ITFG1  | Cerebral palsy            | 27 | up-regulated   | (125)                           |
| ITFG1  | Cerebrovascular disease   | 9  | down-regulated | (24) (41)                       |
| ITFG1  | Chronic fatigue syndrome  | 78 | up-regulated   | (25)                            |
| ITFG1  | Dementia                  | 43 | down-regulated | (18) (5) (52)                   |
| ITFG1  | Disorder of basal ganglia | 78 | down-regulated | (10) (26) (28) (29) (6)         |
| ITFG1  | Disorder of brain         | 20 | up-regulated   | (31) (32)                       |
| ITFG1  | Encephalomyelopathy       | 21 | down-regulated | (83) (91)                       |
| ITFG1  | Epilepsy                  | 8  | down-regulated | (123)                           |
| ITFG1  | Huntington's disease      | 86 | down-regulated | (10) (117) (29)                 |
| ITFG1  | Hypoxia of brain          | 2  | down-regulated | (41)                            |
| ITFG1  | Meningitis                | 44 | up-regulated   | (33) (8) (34)                   |
| ITFG1  | Mood disorder             | 37 | down-regulated | (85) (3)                        |
| ITFG1  | Movement disorder         | 75 | down-regulated | (10) (26) (28) (29) (6)         |
| ITFG1  | Multiple sclerosis        | 24 | down-regulated | (9) (10) (63) (65)              |
| ITFG1  | Nerve injury              | 28 | down-regulated | (112) (12) (88) (106) (95) (13) |
| ITFG1  | Neuropathy                | 10 | down-regulated | (11) (91) (88) (47)             |
| ITFG1  | Paralytic syndrome        | 42 | down-regulated | (91)                            |
| ITFG1  | Parkinson's disease       | 62 | down-regulated | (26) (28) (6)                   |
| ITFG1  | Prion disease             | 20 | down-regulated | (37) (113)                      |
| ITFG1  | Psychotic disorder        | 22 | down-regulated | (15)                            |
| ITFG1  | Schizophrenia             | 23 | down-regulated | (15)                            |
| ITFG1  | Sleep disorder            | 1  | down-regulated | (56)                            |
| ITFG1  | Spinocerebellar ataxia    | 16 | up-regulated   | (83)                            |
| MAGEH1 | Anxiety disorder          | 46 | up-regulated   | (20)                            |
| MAGEH1 | Autistic disorder         | 22 | down-regulated | (1)                             |
| MAGEH1 | Disorder of basal ganglia | 44 | up-regulated   | (26) (27) (6)                   |
| MAGEH1 | Encephalomyelopathy       | 33 | down-regulated | (83) (2)                        |
| MAGEH1 | Huntington's disease      | 48 | up-regulated   | (27)                            |
| MAGEH1 | Meningitis                | 41 | up-regulated   | (8) (34)                        |
| MAGEH1 | Mood disorder             | 8  | down-regulated | (126)                           |
| MAGEH1 | Movement disorder         | 41 | up-regulated   | (26) (27) (6)                   |

|        |                           |    |                |                                  |
|--------|---------------------------|----|----------------|----------------------------------|
| MAGEH1 | Myoneural disorder        | 54 | up-regulated   | (111)                            |
| MAGEH1 | Nerve injury              | 57 | down-regulated | (11) (88) (127) (105) (106) (13) |
| MAGEH1 | Neuropathy                | 41 | up-regulated   | (11) (90) (88) (127) (128) (111) |
| MAGEH1 | Paralytic syndrome        | 40 | up-regulated   | (91)                             |
| MAGEH1 | Parkinson's disease       | 36 | down-regulated | (26) (6)                         |
| MAGEH1 | Prion disease             | 30 | down-regulated | (37)                             |
| MAGEH1 | Psychotic disorder        | 22 | down-regulated | (57)                             |
| MAGEH1 | Schizophrenia             | 23 | down-regulated | (57)                             |
| MAGEH1 | Spinocerebellar ataxia    | 43 | down-regulated | (83)                             |
| NALCN  | Alzheimer's disease       | 68 | down-regulated | (5) (40) (67)                    |
| NALCN  | Amnestic disorder         | 54 | down-regulated | (115) (129)                      |
| NALCN  | Anxiety disorder          | 56 | up-regulated   | (20)                             |
| NALCN  | Cerebrovascular disease   | 23 | down-regulated | (41)                             |
| NALCN  | Dementia                  | 67 | down-regulated | (5) (40) (67)                    |
| NALCN  | Disorder of basal ganglia | 44 | up-regulated   | (10) (26) (121) (6)              |
| NALCN  | Epilepsy                  | 76 | 3.6E-6 p-value | (130)                            |
| NALCN  | Huntington's disease      | 47 | up-regulated   | (10) (121)                       |
| NALCN  | Hypoxia of brain          | 25 | down-regulated | (41)                             |
| NALCN  | Meningitis                | 48 | down-regulated | (100)                            |
| NALCN  | Mood disorder             | 45 | 3.3E-5 p-value | (131) (74)                       |
| NALCN  | Movement disorder         | 41 | up-regulated   | (10) (26) (121) (6)              |
| NALCN  | Multiple sclerosis        | 8  | down-regulated | (78)                             |
| NALCN  | Myoneural disorder        | 39 | down-regulated | (132)                            |
| NALCN  | Nerve injury              | 55 | down-regulated | (112) (12) (87) (88) (106) (95)  |
| NALCN  | Neuropathy                | 40 | down-regulated | (132) (88) (47) (89)             |
| NALCN  | Parkinson's disease       | 39 | up-regulated   | (26) (6)                         |
| NALCN  | Prion disease             | 30 | down-regulated | (113)                            |
| NALCN  | Psychotic disorder        | 51 | up-regulated   | (38) (66)                        |
| NALCN  | Schizophrenia             | 52 | up-regulated   | (38) (66)                        |
| NCAM1  | Amnestic disorder         | 1  | down-regulated | (115)                            |
| NCAM1  | Autistic disorder         | 1  | down-regulated | (23)                             |
| NCAM1  | Dementia                  | 1  | up-regulated   | (51) (40)                        |
| NCAM1  | Disorder of basal ganglia | 32 | down-regulated | (10) (48) (26) (28) (29) (109)   |
| NCAM1  | Huntington's disease      | 36 | up-regulated   | (29) (121)                       |
| NCAM1  | Meningitis                | 33 | up-regulated   | (33) (8) (34)                    |

|       |                               |    |                |                                   |
|-------|-------------------------------|----|----------------|-----------------------------------|
| NCAM1 | Movement disorder             | 29 | down-regulated | (10) (48) (26) (28)<br>(29) (109) |
| NCAM1 | Parkinson's disease           | 23 | up-regulated   | (10) (48) (26) (42)<br>(28) (109) |
| NCAM1 | Psychotic disorder            | 16 | down-regulated | (57) (38) (66)                    |
| NCAM1 | Schizophrenia                 | 17 | down-regulated | (57) (38) (66)                    |
| NCAM1 | Sleep disorder                | 11 | down-regulated | (56) (58)                         |
| NETO2 | Amnestic disorder             | 41 | down-regulated | (59)                              |
| NETO2 | Anxiety disorder              | 36 | up-regulated   | (133) (20)                        |
| NETO2 | Dementia                      | 43 | down-regulated | (18) (5) (52)                     |
| NETO2 | Disorder of basal ganglia     | 79 | down-regulated | (10) (26) (28) (29)<br>(121) (6)  |
| NETO2 | Huntington's disease          | 90 | down-regulated | (10) (29) (121)                   |
| NETO2 | Mood disorder                 | 21 | down-regulated | (85)                              |
| NETO2 | Movement disorder             | 76 | down-regulated | (10) (26) (28) (29)<br>(121) (6)  |
| NETO2 | Nerve injury                  | 54 | down-regulated | (12) (88) (106) (107)<br>(95)     |
| NETO2 | Parkinson's disease           | 48 | down-regulated | (10) (48) (26) (28) (6)           |
| NETO2 | Psychotic disorder            | 32 | up-regulated   | (15) (16)                         |
| NETO2 | Schizophrenia                 | 32 | up-regulated   | (15) (16)                         |
| NETO2 | Sleep disorder                | 52 | up-regulated   | (56) (50)                         |
| NTRK3 | Alzheimer's disease           | 26 | up-regulated   | (39)                              |
| NTRK3 | Amnestic disorder             | 59 | up-regulated   | (92) (115)                        |
| NTRK3 | Autistic disorder             | 48 | down-regulated | (22) (23)                         |
| NTRK3 | Cerebral palsy                | 65 | down-regulated | (125)                             |
| NTRK3 | Cerebrovascular disease       | 33 | down-regulated | (41)                              |
| NTRK3 | Chronic fatigue syndrome      | 85 | down-regulated | (25)                              |
| NTRK3 | Dementia                      | 26 | up-regulated   | (39)                              |
| NTRK3 | Developmental mental disorder | 50 | down-regulated | (22)                              |
| NTRK3 | Disorder of basal ganglia     | 69 | down-regulated | (48) (26) (27) (28)<br>(29) (30)  |
| NTRK3 | Encephalitis                  | 68 | down-regulated | (82)                              |
| NTRK3 | Huntington's disease          | 76 | down-regulated | (27) (29)                         |
| NTRK3 | Hypoxia of brain              | 36 | down-regulated | (41)                              |
| NTRK3 | Meningitis                    | 80 | down-regulated | (33) (8) (34) (35) (45)           |
| NTRK3 | Mental retardation            | 48 | down-regulated | (22)                              |
| NTRK3 | Movement disorder             | 66 | down-regulated | (48) (26) (27) (28)               |

|       |                                           |    |                |                                    |
|-------|-------------------------------------------|----|----------------|------------------------------------|
|       |                                           |    |                | (29) (30)                          |
| NTRK3 | Multiple sclerosis                        | 56 | up-regulated   | (9) (81) (65)                      |
| NTRK3 | Nerve injury                              | 91 | down-regulated | (11) (12) (127) (107)<br>(95) (89) |
| NTRK3 | Neural tube defect                        | 53 | up-regulated   | (54)                               |
| NTRK3 | Neuropathy                                | 68 | down-regulated | (11) (134) (127) (47)<br>(14) (89) |
| NTRK3 | Parkinson's disease                       | 53 | down-regulated | (48) (26) (28) (30)                |
| NTRK3 | Prion disease                             | 63 | up-regulated   | (37)                               |
| NTRK3 | Psychotic disorder                        | 94 | up-regulated   | (57) (38) (80)                     |
| NTRK3 | Schizophrenia                             | 94 | up-regulated   | (57) (38) (80)                     |
| NTRK3 | Sleep disorder                            | 64 | down-regulated | (56) (50)                          |
| OPN5  | Disorder of basal ganglia                 | 27 | down-regulated | (10)                               |
| OPN5  | Meningitis                                | 70 | up-regulated   | (8) (34)                           |
| OPN5  | Movement disorder                         | 24 | down-regulated | (10)                               |
| OPN5  | Neuropathy                                | 29 | down-regulated | (60)                               |
| OPN5  | Parkinson's disease                       | 35 | down-regulated | (10)                               |
| OPN5  | Psychotic disorder                        | 68 | up-regulated   | (17)                               |
| OPN5  | Schizophrenia                             | 68 | up-regulated   | (17)                               |
| PAGE3 | Disorder of basal ganglia                 | 77 | down-regulated | (48)                               |
| PAGE3 | Movement disorder                         | 74 | down-regulated | (48)                               |
| PAGE3 | Parkinson's disease                       | 85 | down-regulated | (48)                               |
| PAGE5 | Disorder of basal ganglia                 | 52 | down-regulated | (48) (29) (6)                      |
| PAGE5 | Huntington's disease                      | 36 | down-regulated | (29)                               |
| PAGE5 | Meningitis                                | 47 | down-regulated | (34)                               |
| PAGE5 | Movement disorder                         | 49 | down-regulated | (48) (29) (6)                      |
| PAGE5 | Multiple sclerosis                        | 36 | up-regulated   | (4)                                |
| PAGE5 | Parkinson's disease                       | 56 | down-regulated | (48) (6)                           |
| PAGE5 | Psychotic disorder                        | 86 | up-regulated   | (17)                               |
| PAGE5 | Schizophrenia                             | 87 | up-regulated   | (17)                               |
| PHKB  | Alzheimer's disease                       | 2  | down-regulated | (39) (18)                          |
| PHKB  | Anxiety disorder                          | 12 | up-regulated   | (133)                              |
| PHKB  | Autistic disorder                         | 7  | up-regulated   | (21) (23)                          |
| PHKB  | Cerebral palsy                            | 36 | down-regulated | (125) (99)                         |
| PHKB  | Childhood disorder of conduct and emotion | 16 | up-regulated   | (119)                              |
| PHKB  | Chronic fatigue syndrome                  | 67 | up-regulated   | (25)                               |
| PHKB  | Dementia                                  | 2  | down-regulated | (39) (18)                          |
| PHKB  | Disorder of basal ganglia                 | 35 | down-regulated | (48) (117) (26) (27)<br>(29) (6)   |

|         |                                          |    |                |                                    |
|---------|------------------------------------------|----|----------------|------------------------------------|
| PHKB    | Disorder of brain                        | 2  | up-regulated   | (32)                               |
| PHKB    | Encephalomyelopathy                      | 26 | down-regulated | (83) (91)                          |
| PHKB    | Epilepsy                                 | 1  | down-regulated | (123)                              |
| PHKB    | Huntington's disease                     | 29 | up-regulated   | (117) (27) (29)                    |
| PHKB    | Meningitis                               | 35 | down-regulated | (100) (8) (35) (53)                |
| PHKB    | Movement disorder                        | 32 | down-regulated | (48) (117) (26) (27)<br>(29) (6)   |
| PHKB    | Multiple sclerosis                       | 1  | down-regulated | (81)                               |
| PHKB    | Nerve injury                             | 25 | down-regulated | (87) (88) (61) (106)<br>(107) (89) |
| PHKB    | Neuropathy                               | 23 | down-regulated | (11) (91) (88) (89)                |
| PHKB    | Paralytic syndrome                       | 46 | down-regulated | (91)                               |
| PHKB    | Parkinson's disease                      | 36 | down-regulated | (48) (26) (28) (109)<br>(30) (6)   |
| PHKB    | Prion disease                            | 15 | up-regulated   | (49) (113)                         |
| PHKB    | Sleep disorder                           | 1  | up-regulated   | (50)                               |
| PHKB    | Spinocerebellar ataxia                   | 9  | up-regulated   | (83)                               |
| PPP1R1C | Attention deficit hyperactivity disorder | 1  | 0.0003 p-value | (135)                              |
| PPP1R1C | Developmental mental disorder            | 11 | down-regulated | (22)                               |
| PPP1R1C | Disorder of basal ganglia                | 1  | up-regulated   | (26)                               |
| PPP1R1C | Meningitis                               | 8  | up-regulated   | (8)                                |
| PPP1R1C | Mental retardation                       | 9  | down-regulated | (22)                               |
| PPP1R1C | Mood disorder                            | 1  | 0.0008 p-value | (74)                               |
| PPP1R1C | Movement disorder                        | 1  | up-regulated   | (26)                               |
| PPP1R1C | Multiple sclerosis                       | 11 | up-regulated   | (64) (78)                          |
| PPP1R1C | Myoneural disorder                       | 20 | down-regulated | (132)                              |
| PPP1R1C | Nerve injury                             | 26 | up-regulated   | (112) (11) (105) (13)              |
| PPP1R1C | Neural tube defect                       | 27 | down-regulated | (54)                               |
| PPP1R1C | Neuropathy                               | 17 | down-regulated | (11) (132) (47)                    |
| PPP1R1C | Parkinson's disease                      | 1  | up-regulated   | (26)                               |
| PPP1R1C | Psychotic disorder                       | 4  | 7.9E-5 p-value | (38)                               |
| PPP1R1C | Schizophrenia                            | 4  | 7.9E-5 p-value | (38)                               |
| PSMC1   | Alzheimer's disease                      | 41 | up-regulated   | (39) (51)                          |
| PSMC1   | Anxiety disorder                         | 40 | up-regulated   | (98)                               |
| PSMC1   | Autistic disorder                        | 23 | down-regulated | (1)                                |
| PSMC1   | Cerebrovascular disease                  | 54 | down-regulated | (24)                               |

|       |                               |    |                |                                   |
|-------|-------------------------------|----|----------------|-----------------------------------|
| PSMC1 | Dementia                      | 41 | up-regulated   | (39) (51)                         |
| PSMC1 | Disorder of basal ganglia     | 59 | down-regulated | (10) (26) (42) (27)<br>(30) (6)   |
| PSMC1 | Huntington's disease          | 48 | down-regulated | (27)                              |
| PSMC1 | Hypoxia of brain              | 40 | up-regulated   | (136)                             |
| PSMC1 | Movement disorder             | 56 | down-regulated | (10) (26) (42) (27)<br>(30) (6)   |
| PSMC1 | Nerve injury                  | 34 | down-regulated | (106)                             |
| PSMC1 | Neuropathy                    | 67 | down-regulated | (90) (47)                         |
| PSMC1 | Parkinson's disease           | 62 | down-regulated | (10) (26) (42) (28)<br>(30) (6)   |
| PSMC1 | Prion disease                 | 82 | down-regulated | (49) (37)                         |
| PSMC1 | Psychotic disorder            | 39 | down-regulated | (57) (38)                         |
| PSMC1 | Schizophrenia                 | 40 | down-regulated | (57) (38)                         |
| PSMC1 | Sleep disorder                | 27 | down-regulated | (56)                              |
| PTBP2 | Amnestic disorder             | 6  | down-regulated | (115)                             |
| PTBP2 | Amyotrophic lateral sclerosis | 10 | down-regulated | (10)                              |
| PTBP2 | Anxiety disorder              | 45 | up-regulated   | (20)                              |
| PTBP2 | Autistic disorder             | 14 | up-regulated   | (21) (71)                         |
| PTBP2 | Cerebral palsy                | 28 | up-regulated   | (125)                             |
| PTBP2 | Disorder of basal ganglia     | 51 | down-regulated | (117) (26) (27) (28)<br>(109) (6) |
| PTBP2 | Encephalomyelopathy           | 11 | down-regulated | (2) (91)                          |
| PTBP2 | Epilepsy                      | 23 | 0.0002 p-value | (137)                             |
| PTBP2 | Huntington's disease          | 31 | up-regulated   | (117) (27)                        |
| PTBP2 | Meningitis                    | 51 | down-regulated | (8) (93) (35) (45)                |
| PTBP2 | Mood disorder                 | 56 | down-regulated | (85) (77) (126) (138)             |
| PTBP2 | Motor neuron disease          | 22 | down-regulated | (10) (36) (62)                    |
| PTBP2 | Movement disorder             | 48 | down-regulated | (117) (26) (27) (28)<br>(109) (6) |
| PTBP2 | Nerve injury                  | 47 | down-regulated | (12) (87) (88) (105)<br>(107)     |
| PTBP2 | Neuropathy                    | 26 | down-regulated | (60) (90) (91) (88)<br>(128) (47) |
| PTBP2 | Paralytic syndrome            | 32 | up-regulated   | (91)                              |
| PTBP2 | Parkinson's disease           | 57 | down-regulated | (26) (28) (109) (6)               |

|       |                                          |    |                |                                 |
|-------|------------------------------------------|----|----------------|---------------------------------|
| PTBP2 | Prion disease                            | 17 | down-regulated | (113)                           |
| PTBP2 | Psychotic disorder                       | 42 | up-regulated   | (38) (16)                       |
| PTBP2 | Schizophrenia                            | 42 | up-regulated   | (38) (16)                       |
| PTBP2 | Sleep disorder                           | 1  | down-regulated | (56)                            |
| RP11  | Amnestic disorder                        | 30 | up-regulated   | (92)                            |
| RP11  | Anxiety disorder                         | 64 | down-regulated | (98) (20)                       |
| RP11  | Autistic disorder                        | 52 | up-regulated   | (21) (22)                       |
| RP11  | Cerebrovascular disease                  | 27 | down-regulated | (24)                            |
| RP11  | Developmental mental disorder            | 68 | up-regulated   | (22)                            |
| RP11  | Disorder of basal ganglia                | 70 | down-regulated | (117) (27) (28) (29) (109)      |
| RP11  | Disorder of brain                        | 49 | down-regulated | (139)                           |
| RP11  | Encephalomyelopathy                      | 39 | up-regulated   | (83) (91)                       |
| RP11  | Huntington's disease                     | 82 | down-regulated | (117) (27) (29)                 |
| RP11  | Hypoxia of brain                         | 24 | up-regulated   | (7)                             |
| RP11  | Meningitis                               | 81 | down-regulated | (100) (8) (53) (45)             |
| RP11  | Mental retardation                       | 65 | up-regulated   | (22)                            |
| RP11  | Mood disorder                            | 17 | up-regulated   | (3)                             |
| RP11  | Movement disorder                        | 67 | down-regulated | (117) (27) (28) (29) (109)      |
| RP11  | Nerve injury                             | 25 | up-regulated   | (60) (12) (13)                  |
| RP11  | Neuropathy                               | 43 | up-regulated   | (60) (90) (46) (91) (128) (140) |
| RP11  | Paralytic syndrome                       | 49 | up-regulated   | (91)                            |
| RP11  | Parkinson's disease                      | 34 | down-regulated | (28) (109)                      |
| RP11  | Prion disease                            | 48 | down-regulated | (49)                            |
| RP11  | Psychotic disorder                       | 41 | up-regulated   | (17)                            |
| RP11  | Schizophrenia                            | 41 | up-regulated   | (17)                            |
| RP11  | Sleep disorder                           | 59 | down-regulated | (50)                            |
| RP11  | Spinocerebellar ataxia                   | 44 | up-regulated   | (83)                            |
| RP13  | Alzheimer's disease                      | 51 | down-regulated | (39) (51) (40) (52)             |
| RP13  | Attention deficit hyperactivity disorder | 79 |                | (70)                            |
| RP13  | Autistic disorder                        | 68 | down-regulated | (21) (71)                       |
| RP13  | Cerebrovascular disease                  | 19 | down-regulated | (24)                            |
| RP13  | Dementia                                 | 51 | down-regulated | (39) (51) (40) (52)             |
| RP13  | Developmental mental disorder            | 99 |                | (141)                           |

|       |                               |    |                |                         |
|-------|-------------------------------|----|----------------|-------------------------|
| RP13  | Disorder of basal ganglia     | 25 | up-regulated   | (29) (30)               |
| RP13  | Encephalitis                  | 55 | down-regulated | (82)                    |
| RP13  | Encephalomyelopathy           | 24 | up-regulated   | (91)                    |
| RP13  | Huntington's disease          | 27 | up-regulated   | (29)                    |
| RP13  | Hypoxia of brain              | 33 | down-regulated | (136)                   |
| RP13  | Meningitis                    | 71 | up-regulated   | (100) (33) (34) (45)    |
| RP13  | Mental retardation            | 97 |                | (141)                   |
| RP13  | Movement disorder             | 23 | up-regulated   | (29) (30)               |
| RP13  | Nerve injury                  | 24 | down-regulated | (88) (61) (13)          |
| RP13  | Neuropathy                    | 16 | up-regulated   | (91) (88)               |
| RP13  | Paralytic syndrome            | 44 | up-regulated   | (91)                    |
| RP13  | Parkinson's disease           | 21 | down-regulated | (30)                    |
| RP13  | Sleep disorder                | 29 | down-regulated | (56)                    |
| RP4   | Anxiety disorder              | 25 | down-regulated | (20)                    |
| RP4   | Autistic disorder             | 25 | down-regulated | (22)                    |
| RP4   | Cerebral palsy                | 46 | down-regulated | (125)                   |
| RP4   | Developmental mental disorder | 32 | down-regulated | (22)                    |
| RP4   | Disorder of basal ganglia     | 8  | down-regulated | (27) (6)                |
| RP4   | Encephalitis                  | 33 | down-regulated | (43)                    |
| RP4   | Encephalomyelopathy           | 16 | up-regulated   | (114)                   |
| RP4   | Huntington's disease          | 9  | down-regulated | (27)                    |
| RP4   | Meningitis                    | 34 | down-regulated | (8)                     |
| RP4   | Mental retardation            | 29 | down-regulated | (22)                    |
| RP4   | Mood disorder                 | 36 | 3.1E-5 p-value | (76)                    |
| RP4   | Motor neuron disease          | 3  | down-regulated | (62)                    |
| RP4   | Movement disorder             | 5  | down-regulated | (27) (6)                |
| RP4   | Nerve injury                  | 31 | down-regulated | (87) (88) (61) (89)     |
| RP4   | Neuropathy                    | 27 | down-regulated | (46) (88) (89)          |
| RP4   | Parkinson's disease           | 4  | up-regulated   | (6)                     |
| RPL35 | Alzheimer's disease           | 2  | up-regulated   | (39)                    |
| RPL35 | Amnestic disorder             | 20 | up-regulated   | (92)                    |
| RPL35 | Autistic disorder             | 30 | up-regulated   | (21)                    |
| RPL35 | Cerebrovascular disease       | 16 | up-regulated   | (24)                    |
| RPL35 | Dementia                      | 2  | up-regulated   | (39)                    |
| RPL35 | Disorder of basal ganglia     | 26 | up-regulated   | (27) (29) (30)          |
| RPL35 | Encephalitis                  | 29 | down-regulated | (110)                   |
| RPL35 | Encephalomyelitis             | 40 | down-regulated | (110)                   |
| RPL35 | Encephalomyelopathy           | 6  | down-regulated | (110)                   |
| RPL35 | Huntington's disease          | 35 | up-regulated   | (27) (29)               |
| RPL35 | Hypoxia of brain              | 10 | up-regulated   | (7)                     |
| RPL35 | Meningitis                    | 87 | up-regulated   | (33) (8) (34) (35) (45) |



|       |                               |    |                |                                    |
|-------|-------------------------------|----|----------------|------------------------------------|
| RPL35 | Mood disorder                 | 4  | down-regulated | (3)                                |
| RPL35 | Motor neuron disease          | 23 | up-regulated   | (36)                               |
| RPL35 | Movement disorder             | 23 | up-regulated   | (27) (29) (30)                     |
| RPL35 | Multiple sclerosis            | 3  | up-regulated   | (4)                                |
| RPL35 | Myoneural disorder            | 27 | up-regulated   | (132)                              |
| RPL35 | Nerve injury                  | 26 | up-regulated   | (11) (12) (88) (127)               |
| RPL35 | Neuropathy                    | 28 | up-regulated   | (11) (90) (132) (88)<br>(127) (47) |
| RPL35 | Parkinson's disease           | 4  | down-regulated | (30)                               |
| RPL35 | Prion disease                 | 15 | down-regulated | (37)                               |
| RPL35 | Psychotic disorder            | 1  | 0.0008 p-value | (38)                               |
| RPL35 | Schizophrenia                 | 1  | 0.0008 p-value | (38)                               |
| RPL35 | Sleep disorder                | 43 | down-regulated | (50) (58)                          |
| RPL5  | Alzheimer's disease           | 3  | down-regulated | (52)                               |
| RPL5  | Amyotrophic lateral sclerosis | 29 | down-regulated | (19)                               |
| RPL5  | Autistic disorder             | 23 | up-regulated   | (21) (71)                          |
| RPL5  | Cerebrovascular disease       | 6  | up-regulated   | (24)                               |
| RPL5  | Dementia                      | 3  | down-regulated | (52)                               |
| RPL5  | Disorder of basal ganglia     | 33 | up-regulated   | (26) (27) (28) (29)                |
| RPL5  | Disorder of brain             | 12 | up-regulated   | (32)                               |
| RPL5  | Encephalitis                  | 58 | down-regulated | (110) (142) (82)                   |
| RPL5  | Encephalomyelitis             | 37 | down-regulated | (110)                              |
| RPL5  | Encephalomyelopathy           | 2  | down-regulated | (110)                              |
| RPL5  | Huntington's disease          | 40 | up-regulated   | (27) (29)                          |
| RPL5  | Hypoxia of brain              | 1  | up-regulated   | (7)                                |
| RPL5  | Meningitis                    | 52 | down-regulated | (100) (33) (8) (93)<br>(45)        |
| RPL5  | Motor neuron disease          | 38 | down-regulated | (36) (19)                          |
| RPL5  | Movement disorder             | 30 | up-regulated   | (26) (27) (28) (29)                |
| RPL5  | Multiple sclerosis            | 70 | 2.5E-6 p-value | (102) (103)                        |
| RPL5  | Myoneural disorder            | 17 | up-regulated   | (111)                              |
| RPL5  | Nerve injury                  | 22 | down-regulated | (12) (134) (19) (95)               |
| RPL5  | Neuropathy                    | 7  | up-regulated   | (90) (134) (128)<br>(111)          |
| RPL5  | Paralytic syndrome            | 17 | up-regulated   | (91)                               |
| RPL5  | Parkinson's disease           | 18 | up-regulated   | (26) (28)                          |
| RPL5  | Prion disease                 | 13 | down-regulated | (37)                               |
| RPL5  | Psychotic disorder            | 54 | 2.2E-6 p-value | (108) (38)                         |

|       |                               |    |                |                            |
|-------|-------------------------------|----|----------------|----------------------------|
| RPL5  | Schizophrenia                 | 55 | 2.2E-6 p-value | (108) (38)                 |
| RPL5  | Sleep disorder                | 24 | down-regulated | (56) (50)                  |
| RRAGB | Alzheimer's disease           | 22 | down-regulated | (39) (5)                   |
| RRAGB | Dementia                      | 21 | down-regulated | (39) (5)                   |
| RRAGB | Disorder of basal ganglia     | 36 | down-regulated | (10) (26) (27) (28) (6)    |
| RRAGB | Disorder of brain             | 17 | up-regulated   | (32)                       |
| RRAGB | Encephalitis                  | 27 | down-regulated | (82)                       |
| RRAGB | Encephalomyelopathy           | 6  | down-regulated | (2)                        |
| RRAGB | Huntington's disease          | 19 | down-regulated | (10) (27)                  |
| RRAGB | Meningitis                    | 11 | up-regulated   | (8)                        |
| RRAGB | Mood disorder                 | 1  | up-regulated   | (3)                        |
| RRAGB | Motor neuron disease          | 1  | up-regulated   | (62)                       |
| RRAGB | Movement disorder             | 33 | down-regulated | (10) (26) (27) (28) (6)    |
| RRAGB | Multiple sclerosis            | 9  | down-regulated | (10)                       |
| RRAGB | Nerve injury                  | 48 | down-regulated | (60) (112) (87) (88) (106) |
| RRAGB | Neuropathy                    | 6  | down-regulated | (11) (88) (89)             |
| RRAGB | Parkinson's disease           | 41 | down-regulated | (10) (26) (28) (6)         |
| RRAGB | Psychotic disorder            | 13 | down-regulated | (15) (16)                  |
| RRAGB | Schizophrenia                 | 13 | down-regulated | (15) (16)                  |
| RRAGB | Sleep disorder                | 18 | down-regulated | (58)                       |
| RYR3  | Alzheimer's disease           | 26 | down-regulated | (18) (40)                  |
| RYR3  | Anxiety disorder              | 63 | up-regulated   | (133) (98)                 |
| RYR3  | Autistic disorder             | 21 | up-regulated   | (1)                        |
| RYR3  | Cerebral palsy                | 85 | up-regulated   | (99)                       |
| RYR3  | Cerebrovascular disease       | 65 | 6.5E-6 p-value | (72)                       |
| RYR3  | Dementia                      | 25 | down-regulated | (18) (40)                  |
| RYR3  | Developmental mental disorder | 36 | down-regulated | (22)                       |
| RYR3  | Disorder of basal ganglia     | 56 | up-regulated   | (29) (6)                   |
| RYR3  | Disorder of brain             | 49 | up-regulated   | (32)                       |
| RYR3  | Encephalitis                  | 50 | up-regulated   | (110)                      |
| RYR3  | Encephalomyelitis             | 61 | up-regulated   | (110)                      |
| RYR3  | Encephalomyelopathy           | 34 | up-regulated   | (2) (110)                  |
| RYR3  | Epilepsy                      | 60 | 0.7E-5 p-value | (130)                      |
| RYR3  | Huntington's disease          | 68 | up-regulated   | (29)                       |
| RYR3  | Meningitis                    | 57 | up-regulated   | (33) (35) (45)             |
| RYR3  | Mental retardation            | 34 | down-regulated | (22)                       |
| RYR3  | Mood disorder                 | 57 | 8.3E-6 p-value | (143) (74)                 |
| RYR3  | Movement disorder             | 53 | up-regulated   | (29) (6)                   |

|        |                                           |    |                |                                      |
|--------|-------------------------------------------|----|----------------|--------------------------------------|
| RYR3   | Multiple sclerosis                        | 24 | up-regulated   | (63) (65)                            |
| RYR3   | Myoneural disorder                        | 46 | up-regulated   | (132)                                |
| RYR3   | Nerve injury                              | 70 | down-regulated | (112) (12) (94) (105)<br>(106) (107) |
| RYR3   | Neuropathy                                | 44 | down-regulated | (90) (46) (94) (132)<br>(47)         |
| RYR3   | Parkinson's disease                       | 10 | up-regulated   | (6)                                  |
| RYR3   | Prion disease                             | 47 | down-regulated | (37)                                 |
| RYR3   | Psychotic disorder                        | 57 | up-regulated   | (144) (57) (15) (38)<br>(145)        |
| RYR3   | Schizophrenia                             | 58 | up-regulated   | (144) (57) (15) (38)<br>(145)        |
| RYR3   | Sleep disorder                            | 46 | up-regulated   | (56) (50)                            |
| SCAI   | Alzheimer's disease                       | 38 | down-regulated | (39) (18) (40)                       |
| SCAI   | Amyotrophic lateral sclerosis             | 41 | up-regulated   | (10)                                 |
| SCAI   | Autistic disorder                         | 16 | up-regulated   | (21)                                 |
| SCAI   | Cerebrovascular disease                   | 14 | down-regulated | (41)                                 |
| SCAI   | Dementia                                  | 38 | down-regulated | (39) (18) (40)                       |
| SCAI   | Disorder of basal ganglia                 | 77 | down-regulated | (28) (29) (6)                        |
| SCAI   | Huntington's disease                      | 66 | down-regulated | (29)                                 |
| SCAI   | Hypoxia of brain                          | 17 | down-regulated | (41)                                 |
| SCAI   | Meningitis                                | 54 | down-regulated | (8) (35)                             |
| SCAI   | Mood disorder                             | 26 | down-regulated | (85) (3)                             |
| SCAI   | Motor neuron disease                      | 38 | up-regulated   | (10)                                 |
| SCAI   | Movement disorder                         | 74 | down-regulated | (28) (29) (6)                        |
| SCAI   | Multiple sclerosis                        | 3  | down-regulated | (9)                                  |
| SCAI   | Nerve injury                              | 41 | up-regulated   | (60) (12) (61)                       |
| SCAI   | Neuropathy                                | 14 | up-regulated   | (47)                                 |
| SCAI   | Parkinson's disease                       | 78 | down-regulated | (28) (6)                             |
| SCAI   | Prion disease                             | 43 | up-regulated   | (49) (113)                           |
| SCAI   | Psychotic disorder                        | 35 | down-regulated | (57) (15) (38)                       |
| SCAI   | Schizophrenia                             | 35 | down-regulated | (57) (15) (38)                       |
| SCAI   | Sleep disorder                            | 53 | up-regulated   | (56) (50) (58)                       |
| SEMA3A | Alzheimer's disease                       | 1  | 5.9E-5 p-value | (40)                                 |
| SEMA3A | Amnesic disorder                          | 1  | down-regulated | (59)                                 |
| SEMA3A | Autistic disorder                         | 1  | down-regulated | (71)                                 |
| SEMA3A | Childhood disorder of conduct and emotion | 26 | up-regulated   | (119) (120)                          |
| SEMA3A | Dementia                                  | 1  | 5.9E-5 p-value | (40)                                 |
| SEMA3A | Disorder of basal ganglia                 | 7  | down-regulated | (10) (48) (27) (121)                 |

|          |                           |     |                |                                    |
|----------|---------------------------|-----|----------------|------------------------------------|
| SEMA3A   | Huntington's disease      | 17  | down-regulated | (10) (27) (121)                    |
| SEMA3A   | Lissencephaly             | 100 |                | (146)                              |
| SEMA3A   | Mood disorder             | 1   | 0.0003 p-value | (76)                               |
| SEMA3A   | Motor neuron disease      | 1   | up-regulated   | (36)                               |
| SEMA3A   | Movement disorder         | 4   | down-regulated | (10) (48) (27) (121)               |
| SEMA3A   | Multiple sclerosis        | 1   | up-regulated   | (65) (78)                          |
| SEMA3A   | Nerve injury              | 8   | up-regulated   | (11) (12) (88)                     |
| SEMA3A   | Neuropathy                | 71  | down-regulated | (11) (88) (47) (140)               |
| SEMA3A   | Parkinson's disease       | 1   | up-regulated   | (48)                               |
| SEMA3A   | Prion disease             | 45  | 2.7E-6 p-value | (147)                              |
| SEMA3A   | Psychotic disorder        | 26  | down-regulated | (38) (66) (86)                     |
| SEMA3A   | Schizophrenia             | 26  | down-regulated | (38) (66) (86)                     |
| SEMA3A   | Sleep disorder            | 30  | up-regulated   | (56) (50)                          |
| SLC20A2  | Amnesic disorder          | 19  | up-regulated   | (59)                               |
| SLC20A2  | Autistic disorder         | 7   | up-regulated   | (1)                                |
| SLC20A2  | Disorder of basal ganglia | 28  | down-regulated | (10) (29) (6)                      |
| SLC20A2  | Disorder of brain         | 26  | up-regulated   | (31) (32)                          |
| SLC20A2  | Encephalomyelopathy       | 14  | down-regulated | (2)                                |
| SLC20A2  | Huntington's disease      | 29  | down-regulated | (10) (29)                          |
| SLC20A2  | Meningitis                | 8   | up-regulated   | (8) (53)                           |
| SLC20A2  | Mood disorder             | 19  | 8.5E-5 p-value | (74)                               |
| SLC20A2  | Motor neuron disease      | 5   | down-regulated | (62)                               |
| SLC20A2  | Movement disorder         | 25  | down-regulated | (10) (29) (6)                      |
| SLC20A2  | Multiple sclerosis        | 50  | up-regulated   | (9) (4) (65) (78)                  |
| SLC20A2  | Nerve injury              | 50  | up-regulated   | (112) (12) (87) (88)<br>(107) (95) |
| SLC20A2  | Neuropathy                | 28  | down-regulated | (148) (90) (88) (47)<br>(14)       |
| SLC20A2  | Paralytic syndrome        | 24  | down-regulated | (91)                               |
| SLC20A2  | Parkinson's disease       | 24  | down-regulated | (6)                                |
| SLC20A2  | Prion disease             | 40  | up-regulated   | (49) (37)                          |
| SLC20A2  | Psychotic disorder        | 17  | up-regulated   | (57) (17)                          |
| SLC20A2  | Schizophrenia             | 17  | up-regulated   | (57) (17)                          |
| SLC20A2  | Sleep disorder            | 10  | down-regulated | (56)                               |
| SLC25A14 | Alzheimer's disease       | 27  | down-regulated | (39) (18) (116)                    |
| SLC25A14 | Autistic disorder         | 1   | down-regulated | (1)                                |
| SLC25A14 | Cerebral palsy            | 20  | down-regulated | (125)                              |
| SLC25A14 | Dementia                  | 26  | down-regulated | (39) (18) (116)                    |
| SLC25A14 | Disorder of basal ganglia | 45  | down-regulated | (10) (26) (42) (29) (6)            |
| SLC25A14 | Encephalitis              | 24  | up-regulated   | (142)                              |

|          |                                          |    |                |                           |
|----------|------------------------------------------|----|----------------|---------------------------|
| SLC25A14 | Encephalomyelopathy                      | 12 | up-regulated   | (83) (2)                  |
| SLC25A14 | Huntington's disease                     | 47 | down-regulated | (10) (29)                 |
| SLC25A14 | Meningitis                               | 16 | down-regulated | (8)                       |
| SLC25A14 | Movement disorder                        | 42 | down-regulated | (10) (26) (42) (29) (6)   |
| SLC25A14 | Multiple sclerosis                       | 2  | down-regulated | (63) (78)                 |
| SLC25A14 | Nerve injury                             | 27 | down-regulated | (12) (87) (94) (88) (107) |
| SLC25A14 | Neuropathy                               | 18 | down-regulated | (94) (88) (128)           |
| SLC25A14 | Parkinson's disease                      | 41 | down-regulated | (10) (48) (26) (42) (6)   |
| SLC25A14 | Prion disease                            | 29 | down-regulated | (37)                      |
| SLC25A14 | Psychotic disorder                       | 25 | up-regulated   | (15) (17)                 |
| SLC25A14 | Schizophrenia                            | 25 | up-regulated   | (15) (17)                 |
| SLC25A14 | Spinocerebellar ataxia                   | 14 | up-regulated   | (83)                      |
| SMARCAD1 | Alzheimer's disease                      | 19 | down-regulated | (39) (118)                |
| SMARCAD1 | Amnestic disorder                        | 1  | up-regulated   | (92)                      |
| SMARCAD1 | Anxiety disorder                         | 28 | up-regulated   | (149)                     |
| SMARCAD1 | Autistic disorder                        | 1  | down-regulated | (23) (1)                  |
| SMARCAD1 | Cerebrovascular disease                  | 11 | up-regulated   | (24)                      |
| SMARCAD1 | Dementia                                 | 18 | down-regulated | (39) (118)                |
| SMARCAD1 | Disorder of basal ganglia                | 1  | up-regulated   | (117) (27)                |
| SMARCAD1 | Encephalomyelopathy                      | 1  | down-regulated | (83)                      |
| SMARCAD1 | Huntington's disease                     | 11 | up-regulated   | (117) (27)                |
| SMARCAD1 | Meningitis                               | 39 | down-regulated | (100) (33) (8) (34)       |
| SMARCAD1 | Mood disorder                            | 13 | up-regulated   | (149) (126) (3)           |
| SMARCAD1 | Movement disorder                        | 1  | up-regulated   | (117) (27)                |
| SMARCAD1 | Nerve injury                             | 17 | down-regulated | (112) (11) (94) (88) (95) |
| SMARCAD1 | Neuropathy                               | 14 | down-regulated | (11) (94) (88) (47)       |
| SMARCAD1 | Paralytic syndrome                       | 11 | up-regulated   | (91)                      |
| SMARCAD1 | Prion disease                            | 12 | down-regulated | (49)                      |
| SMARCAD1 | Psychotic disorder                       | 1  | 0.0002 p-value | (38)                      |
| SMARCAD1 | Schizophrenia                            | 1  | 0.0002 p-value | (38)                      |
| SMARCAD1 | Sleep disorder                           | 26 | up-regulated   | (56) (50)                 |
| SMARCAD1 | Spinocerebellar ataxia                   | 8  | down-regulated | (83)                      |
| SNORA42  | Attention deficit hyperactivity disorder | 90 | 4.9E-6 p-value | (150)                     |
| SNORA42  | Encephalomyelopathy                      | 51 | up-regulated   | (2)                       |
| SNORA42  | Neuropathy                               | 52 | up-regulated   | (140)                     |

|         |                               |     |                |                                 |
|---------|-------------------------------|-----|----------------|---------------------------------|
| SNORA66 | Autistic disorder             | 33  | down-regulated | (71)                            |
| SNORA66 | Multiple sclerosis            | 100 | 2.5E-6 p-value | (102) (103)                     |
| SNORA66 | Psychotic disorder            | 83  | 2.2E-6 p-value | (108) (38)                      |
| SNORA66 | Schizophrenia                 | 83  | 2.2E-6 p-value | (108) (38)                      |
| SNTG1   | Alzheimer's disease           | 1   | down-regulated | (18)                            |
| SNTG1   | Cerebrovascular disease       | 1   | down-regulated | (41)                            |
| SNTG1   | Dementia                      | 1   | down-regulated | (18)                            |
| SNTG1   | Developmental mental disorder | 68  | down-regulated | (151)                           |
| SNTG1   | Disorder of basal ganglia     | 30  | down-regulated | (10) (48) (26) (29)             |
| SNTG1   | Huntington's disease          | 38  | down-regulated | (10) (29)                       |
| SNTG1   | Hypoxia of brain              | 7   | down-regulated | (84) (41)                       |
| SNTG1   | Meningitis                    | 1   | up-regulated   | (8)                             |
| SNTG1   | Mental disorder               | 100 | down-regulated | (151)                           |
| SNTG1   | Movement disorder             | 27  | down-regulated | (10) (48) (26) (29)             |
| SNTG1   | Multiple sclerosis            | 3   | up-regulated   | (9) (65)                        |
| SNTG1   | Neuropathy                    | 1   | down-regulated | (47)                            |
| SNTG1   | Parkinson's disease           | 13  | down-regulated | (10) (48) (26)                  |
| SNTG1   | Sleep disorder                | 5   | down-regulated | (50)                            |
| SNX19   | Disorder of basal ganglia     | 49  | down-regulated | (26) (27) (29) (6)              |
| SNX19   | Encephalomyelopathy           | 12  | down-regulated | (91)                            |
| SNX19   | Huntington's disease          | 55  | down-regulated | (27) (29)                       |
| SNX19   | Meningitis                    | 67  | up-regulated   | (100) (33) (53)                 |
| SNX19   | Mood disorder                 | 23  | down-regulated | (126)                           |
| SNX19   | Movement disorder             | 46  | down-regulated | (26) (27) (29) (6)              |
| SNX19   | Multiple sclerosis            | 12  | down-regulated | (81)                            |
| SNX19   | Myoneural disorder            | 44  | down-regulated | (111)                           |
| SNX19   | Nerve injury                  | 32  | down-regulated | (11) (12) (127)                 |
| SNX19   | Neuropathy                    | 43  | down-regulated | (11) (90) (46) (91) (127) (111) |
| SNX19   | Paralytic syndrome            | 33  | down-regulated | (91)                            |
| SNX19   | Parkinson's disease           | 38  | down-regulated | (26) (6)                        |
| SNX19   | Prion disease                 | 36  | up-regulated   | (37)                            |
| SNX19   | Psychotic disorder            | 82  | down-regulated | (57) (79) (38) (80)             |
| SNX19   | Schizophrenia                 | 83  | down-regulated | (57) (79) (38) (80)             |
| SNX19   | Sleep disorder                | 51  | up-regulated   | (56) (50) (58)                  |
| SOD3    | Alzheimer's disease           | 1   | down-regulated | (39) (40)                       |

|        |                           |    |                |                                    |
|--------|---------------------------|----|----------------|------------------------------------|
| SOD3   | Anxiety disorder          | 1  | up-regulated   | (152)                              |
| SOD3   | Cerebrovascular disease   | 1  | down-regulated | (24)                               |
| SOD3   | Dementia                  | 18 | up-regulated   | (153) (39) (40)                    |
| SOD3   | Disorder of basal ganglia | 1  | up-regulated   | (10) (29)                          |
| SOD3   | Disorder of brain         | 1  | down-regulated | (32) (122)                         |
| SOD3   | Huntington's disease      | 1  | up-regulated   | (10) (29)                          |
| SOD3   | Meningitis                | 2  | down-regulated | (33) (8) (53)                      |
| SOD3   | Motor neuron disease      | 1  | down-regulated | (36)                               |
| SOD3   | Movement disorder         | 1  | up-regulated   | (10) (29)                          |
| SOD3   | Nerve injury              | 20 | up-regulated   | (112) (12) (87) (88)<br>(107) (95) |
| SOD3   | Neuropathy                | 20 | up-regulated   | (88) (47)                          |
| SOD3   | Prion disease             | 32 | up-regulated   | (49) (37) (113)                    |
| SOD3   | Psychotic disorder        | 1  | up-regulated   | (57)                               |
| SOD3   | Schizophrenia             | 1  | up-regulated   | (57)                               |
| SOD3   | Sleep disorder            | 1  | up-regulated   | (50)                               |
| SPATA7 | Alzheimer's disease       | 23 | down-regulated | (5)                                |
| SPATA7 | Autistic disorder         | 39 | down-regulated | (1)                                |
| SPATA7 | Dementia                  | 23 | down-regulated | (5)                                |
| SPATA7 | Disorder of basal ganglia | 71 | up-regulated   | (10) (117) (26) (29)               |
| SPATA7 | Disorder of brain         | 77 | up-regulated   | (31) (139)                         |
| SPATA7 | Encephalomyelopathy       | 36 | up-regulated   | (2)                                |
| SPATA7 | Huntington's disease      | 81 | up-regulated   | (117) (29)                         |
| SPATA7 | Meningitis                | 54 | up-regulated   | (8) (35)                           |
| SPATA7 | Mood disorder             | 30 | down-regulated | (3)                                |
| SPATA7 | Movement disorder         | 68 | up-regulated   | (10) (117) (26) (29)               |
| SPATA7 | Nerve injury              | 76 | down-regulated | (87) (88) (61) (107)               |
| SPATA7 | Neuropathy                | 61 | down-regulated | (88)                               |
| SPATA7 | Parkinson's disease       | 50 | down-regulated | (10) (26)                          |
| SPATA7 | Psychotic disorder        | 75 | down-regulated | (15) (38)                          |
| SPATA7 | Schizophrenia             | 76 | down-regulated | (15) (38)                          |
| SPATA7 | Sleep disorder            | 98 | down-regulated | (56) (50)                          |
| ST18   | Alzheimer's disease       | 63 | down-regulated | (39) (118) (5)                     |
| ST18   | Amnestic disorder         | 37 | up-regulated   | (92)                               |
| ST18   | Dementia                  | 62 | down-regulated | (39) (118) (5)                     |
| ST18   | Disorder of basal ganglia | 68 | up-regulated   | (26) (27) (28) (29)<br>(109) (121) |
| ST18   | Disorder of brain         | 69 | up-regulated   | (32) (139)                         |
| ST18   | Epilepsy                  | 58 | 4.8E-5 p-value | (130)                              |
| ST18   | Huntington's disease      | 76 | up-regulated   | (27) (29) (121)                    |
| ST18   | Mood disorder             | 35 | down-regulated | (144)                              |

|         |                           |     |                |                                    |
|---------|---------------------------|-----|----------------|------------------------------------|
| ST18    | Movement disorder         | 65  | up-regulated   | (26) (27) (28) (29)<br>(109) (121) |
| ST18    | Multiple sclerosis        | 53  | down-regulated | (63) (65)                          |
| ST18    | Nerve injury              | 49  | up-regulated   | (60) (12) (107)                    |
| ST18    | Neuropathy                | 46  | down-regulated | (90) (47)                          |
| ST18    | Parkinson's disease       | 51  | up-regulated   | (26) (28) (109)                    |
| ST18    | Prion disease             | 49  | down-regulated | (113)                              |
| ST18    | Psychotic disorder        | 48  | up-regulated   | (66) (17)                          |
| ST18    | Schizophrenia             | 48  | up-regulated   | (66) (17)                          |
| ST18    | Sleep disorder            | 36  | down-regulated | (56)                               |
| STYK1   | Alzheimer's disease       | 52  | down-regulated | (5) (40) (52)                      |
| STYK1   | Dementia                  | 51  | down-regulated | (5) (40) (52)                      |
| STYK1   | Disorder of basal ganglia | 49  | down-regulated | (10)                               |
| STYK1   | Huntington's disease      | 55  | down-regulated | (10)                               |
| STYK1   | Hypoxia of brain          | 33  | up-regulated   | (84)                               |
| STYK1   | Mood disorder             | 8   | 0.0003 p-value | (74)                               |
| STYK1   | Movement disorder         | 47  | down-regulated | (10)                               |
| STYK1   | Neural tube defect        | 100 | down-regulated | (54)                               |
| STYK1   | Neuropathy                | 7   | down-regulated | (60)                               |
| STYK1   | Parkinson's disease       | 38  | down-regulated | (10)                               |
| STYK1   | Psychotic disorder        | 41  | down-regulated | (15) (38)                          |
| STYK1   | Schizophrenia             | 41  | down-regulated | (15) (38)                          |
| TMEM135 | Cerebral palsy            | 57  | up-regulated   | (99)                               |
| TMEM135 | Dementia                  | 24  | down-regulated | (39) (18)                          |
| TMEM135 | Disorder of basal ganglia | 43  | down-regulated | (117) (26) (28) (29)<br>(109) (6)  |
| TMEM135 | Disorder of brain         | 44  | up-regulated   | (31) (32)                          |
| TMEM135 | Mood disorder             | 22  | down-regulated | (85)                               |
| TMEM135 | Paralytic syndrome        | 62  | up-regulated   | (91)                               |
| TMEM135 | Parkinson's disease       | 47  | down-regulated | (10) (26) (28) (109)<br>(6)        |
| TMEM135 | Psychotic disorder        | 54  | up-regulated   | (57) (66) (16)                     |
| TMEM135 | Schizophrenia             | 54  | up-regulated   | (57) (66) (16)                     |
| TRPS1   | Alzheimer's disease       | 19  | up-regulated   | (39) (18) (5) (40)                 |
| TRPS1   | Autistic disorder         | 1   | up-regulated   | (21)                               |
| TRPS1   | Cerebrovascular disease   | 23  | 5.0E-5 p-value | (72)                               |
| TRPS1   | Dementia                  | 18  | up-regulated   | (39) (18) (5) (40)                 |
| TRPS1   | Disorder of basal ganglia | 57  | up-regulated   | (117) (26) (28) (29)<br>(109) (6)  |
| TRPS1   | Encephalomyelopathy       | 1   | down-regulated | (83)                               |



|        |                           |     |                |                                |
|--------|---------------------------|-----|----------------|--------------------------------|
| TRPS1  | Huntington's disease      | 66  | up-regulated   | (10) (117) (27) (29) (121)     |
| TRPS1  | Hypoxia of brain          | 14  | up-regulated   | (84) (7)                       |
| TRPS1  | Meningitis                | 51  | up-regulated   | (8) (35) (45)                  |
| TRPS1  | Mood disorder             | 1   | 0.0004 p-value | (74)                           |
| TRPS1  | Motor neuron disease      | 13  | down-regulated | (62)                           |
| TRPS1  | Movement disorder         | 54  | up-regulated   | (117) (26) (28) (29) (109) (6) |
| TRPS1  | Multiple sclerosis        | 27  | up-regulated   | (10) (64) (78)                 |
| TRPS1  | Nerve injury              | 27  | up-regulated   | (112) (11) (95) (89)           |
| TRPS1  | Neuropathy                | 29  | up-regulated   | (11) (90) (128) (47) (14) (89) |
| TRPS1  | Parkinson's disease       | 36  | up-regulated   | (26) (28) (109) (6)            |
| TRPS1  | Psychotic disorder        | 18  | up-regulated   | (15) (38) (66)                 |
| TRPS1  | Schizophrenia             | 18  | up-regulated   | (15) (38) (66)                 |
| TRPS1  | Sleep disorder            | 15  | down-regulated | (50)                           |
| TRPS1  | Spinocerebellar ataxia    | 12  | down-regulated | (83)                           |
| VANGL1 | Autistic disorder         | 1   | down-regulated | (21) (22)                      |
| VANGL1 | Disorder of basal ganglia | 1   | up-regulated   | (29)                           |
| VANGL1 | Epilepsy                  | 11  | down-regulated | (154)                          |
| VANGL1 | Huntington's disease      | 1   | up-regulated   | (29)                           |
| VANGL1 | Meningitis                | 1   | up-regulated   | (33) (8)                       |
| VANGL1 | Mood disorder             | 1   | down-regulated | (76) (3)                       |
| VANGL1 | Neural tube defect        | 100 |                | (146)                          |
| VANGL1 | Psychotic disorder        | 1   | down-regulated | (66)                           |
| VANGL1 | Schizophrenia             | 1   | down-regulated | (66)                           |
| VDAC3  | Anxiety disorder          | 27  | up-regulated   | (98) (20)                      |
| VDAC3  | Autistic disorder         | 18  | up-regulated   | (21) (1)                       |
| VDAC3  | Dementia                  | 20  | down-regulated | (18) (51)                      |
| VDAC3  | Disorder of basal ganglia | 48  | down-regulated | (10) (26) (42) (28) (29) (6)   |
| VDAC3  | Encephalomyelopathy       | 50  | down-regulated | (2) (114)                      |
| VDAC3  | Meningitis                | 65  | up-regulated   | (33) (8) (34) (53)             |
| VDAC3  | Myoneural disorder        | 56  | up-regulated   | (111)                          |
| VDAC3  | Parkinson's disease       | 53  | down-regulated | (10) (26) (42) (28) (6)        |
| WDR38  | Disorder of basal ganglia | 41  | up-regulated   | (29)                           |
| WDR38  | Huntington's disease      | 54  | up-regulated   | (29)                           |
| WDR38  | Meningitis                | 38  | up-regulated   | (8)                            |

|        |                               |    |                |                           |
|--------|-------------------------------|----|----------------|---------------------------|
| WDR38  | Movement disorder             | 38 | up-regulated   | (29)                      |
| WDR38  | Multiple sclerosis            | 40 | up-regulated   | (78)                      |
| WDR38  | Nerve injury                  | 75 | up-regulated   | (11) (12) (87) (107) (89) |
| WDR38  | Neuropathy                    | 64 | up-regulated   | (11) (89)                 |
| WDR38  | Psychotic disorder            | 54 | down-regulated | (38) (66)                 |
| WDR38  | Schizophrenia                 | 54 | down-regulated | (38) (66)                 |
| ZC3H14 | Alzheimer's disease           | 9  | up-regulated   | (18)                      |
| ZC3H14 | Amyotrophic lateral sclerosis | 33 | down-regulated | (10)                      |
| ZC3H14 | Anxiety disorder              | 43 | up-regulated   | (98) (20)                 |
| ZC3H14 | Autistic disorder             | 16 | up-regulated   | (21)                      |
| ZC3H14 | Cerebrovascular disease       | 29 | up-regulated   | (24)                      |
| ZC3H14 | Dementia                      | 8  | up-regulated   | (18)                      |
| ZC3H14 | Disorder of basal ganglia     | 59 | up-regulated   | (48) (26) (27) (29) (109) |
| ZC3H14 | Disorder of brain             | 16 | down-regulated | (32)                      |
| ZC3H14 | Encephalitis                  | 41 | down-regulated | (110)                     |
| ZC3H14 | Encephalomyelitis             | 52 | down-regulated | (110)                     |
| ZC3H14 | Encephalomyelopathy           | 18 | down-regulated | (110)                     |
| ZC3H14 | Huntington's disease          | 63 | up-regulated   | (27) (29)                 |
| ZC3H14 | Meningitis                    | 51 | down-regulated | (8) (34)                  |
| ZC3H14 | Mood disorder                 | 25 | down-regulated | (85) (3)                  |
| ZC3H14 | Motor neuron disease          | 30 | down-regulated | (10)                      |
| ZC3H14 | Movement disorder             | 56 | up-regulated   | (48) (26) (27) (29) (109) |
| ZC3H14 | Multiple sclerosis            | 57 | down-regulated | (81) (78)                 |
| ZC3H14 | Myoneural disorder            | 49 | up-regulated   | (111)                     |
| ZC3H14 | Nerve injury                  | 24 | down-regulated | (11) (107) (89)           |
| ZC3H14 | Neuropathy                    | 32 | down-regulated | (11) (111) (89)           |
| ZC3H14 | Paralytic syndrome            | 41 | up-regulated   | (91)                      |
| ZC3H14 | Parkinson's disease           | 53 | up-regulated   | (48) (26) (109)           |
| ZC3H14 | Prion disease                 | 43 | up-regulated   | (37) (113)                |
| ZC3H14 | Psychotic disorder            | 37 | down-regulated | (57) (38)                 |
| ZC3H14 | Schizophrenia                 | 38 | down-regulated | (57) (38)                 |
| ZC3H14 | Sleep disorder                | 68 | down-regulated | (56) (50) (58)            |
|        |                               |    |                |                           |

## References

1. Ginsberg MR, Rubin RA, Falcone T, Ting AH, Natowicz MR. Brain transcriptional and epigenetic associations with autism. *PLoS ONE*. 2012;7(9):e44736.
2. S N. An induced pluripotent stem cell model for ataxia telangiectasia. *NCBI GEO*. 2012.
3. Belzeaux R, Bergon A, Jeanjean V, Loriod B, Formisano-Treziny C, Verrier L, et al. Responder and nonresponder patients exhibit different peripheral transcriptional signatures during major depressive episode. *Transl Psychiatry*. 2012;2:e185.
4. Gandhi KS, McKay FC, Cox M, Riveros C, Armstrong N, Heard RN, et al. The multiple sclerosis whole blood mRNA transcriptome and genetic associations indicate dysregulation of specific T cell pathways in pathogenesis. *Hum Mol Genet*. 2010;19(11):2134-43.
5. Webster JA, Gibbs JR, Clarke J, Ray M, Zhang W, Holmans P, et al. Genetic control of human brain transcript expression in Alzheimer disease. *Am J Hum Genet*. 2009;84(4):445-58.
6. Zheng B, Liao Z, Locascio JJ, Lesniak KA, Roderick SS, Watt ML, et al. PGC-1 $\alpha$ , a potential therapeutic target for early intervention in Parkinson's disease. *Sci Transl Med*. 2010;2(52):52ra73.
7. Zamanian JL, Xu L, Foo LC, Nouri N, Zhou L, Giffard RG, et al. Genomic analysis of reactive astrogliosis. *J Neurosci*. 2012;32(18):6391-410.
8. Djavani MM, Crasta OR, Zapata JC, Fei Z, Folkerts O, Sobral B, et al. Early blood profiles of virus infection in a monkey model for Lassa fever. *J Virol*. 2007;81(15):7960-73.
9. A K, P L, A W, M S, E M, F W, et al. miRNA Profiling from total blood of Multiple Sclerosis and control samples. *NCBI GEO*. 2009.
10. PF D, S F, SN K, TP B, I F, D S, et al. Common neuroinflammatory pathways in neurodegenerative diseases. *NCBI GEO*. 2011.
11. B Y, X G. Gene expression signatures following nerve injury in a rat model (0d-14d). *NCBI GEO*. 2011.
12. A F. Spinal Cord Injury Murine Model. *NCBI GEO*. 2006.
13. Geeven G, Macgillavry HD, Eggers R, Sassen MM, Verhaagen J, Smit AB, et al. LLM3D: a log-linear modeling-based method to predict functional gene regulatory interactions from genome-wide expression data. *Nucleic Acids Res*. 2011;39(13):5313-27.
14. Howell GR, Soto I, Zhu X, Ryan M, Macalinao DG, Sousa GL, et al. Radiation treatment inhibits monocyte entry into the optic nerve head and prevents neuronal damage in a mouse model of glaucoma. *J Clin Invest*. 2012;122(4):1246-61.
15. Maycox PR, Kelly F, Taylor A, Bates S, Reid J, Logendra R, et al. Analysis of gene expression in two large schizophrenia cohorts identifies multiple changes associated with nerve terminal function. *Mol Psychiatry*. 2009;14(12):1083-94.
16. de Jong S, Boks MP, Fuller TF, Strengman E, Janson E, de Kovel CG, et al. A gene co-expression network in whole blood of schizophrenia patients is

independent of antipsychotic-use and enriched for brain-expressed genes. *PLoS ONE*. 2012;7(6):e39498.

17. Horvath S, Zhang Y, Langfelder P, Kahn RS, Boks MP, van Eijk K, et al. Aging effects on DNA methylation modules in human brain and blood tissue. *Genome Biol*. 2012;13(10):R97.
18. Blalock EM, Geddes JW, Chen KC, Porter NM, Markesbery WR, Landfield PW. Incipient Alzheimer's disease: microarray correlation analyses reveal major transcriptional and tumor suppressor responses. *Proc Natl Acad Sci USA*. 2004;101(7):2173-8.
19. Ticozzi N, LeClerc AL, Keagle PJ, Glass JD, Wills AM, van Blitterswijk M, et al. Paraoxonase gene mutations in amyotrophic lateral sclerosis. *Ann Neurol*. 2010;68(1):102-7.
20. Uddin M, Aiello AE, Wildman DE, Koenen KC, Pawelec G, de Los Santos R, et al. Epigenetic and immune function profiles associated with posttraumatic stress disorder. *Proc Natl Acad Sci USA*. 2010;107(20):9470-5.
21. S K, C C, IA H, LM K, IS K. Blood gene expression signatures distinguish autism spectrum disorders from controls. *NCBI GEO*. 2009.
22. Gregg JP, Lit L, Baron CA, Hertz-Picciotto I, Walker W, Davis RA, et al. Gene expression changes in children with autism. *Genomics*. 2008;91(1):22-9.
23. Chow ML, Winn ME, Li HR, April C, Wynshaw-Boris A, Fan JB, et al. Preprocessing and Quality Control Strategies for Illumina DASL Assay-Based Brain Gene Expression Studies with Semi-Degraded Samples. *Front Genet*. 2012;3:11.
24. Tseveleki V, Rubio R, Vamvakas SS, White J, Taoufik E, Petit E, et al. Comparative gene expression analysis in mouse models for multiple sclerosis, Alzheimer's disease and stroke for identifying commonly regulated and disease-specific gene changes. *Genomics*. 2010;96(2):82-91.
25. Gow JW, Hagan S, Herzyk P, Cannon C, Behan PO, Chaudhuri A. A gene signature for post-infectious chronic fatigue syndrome. *BMC Med Genomics*. 2009;2:38.
26. R R. Human body index - transcriptional profiling. *NCBI GEO*. 2007.
27. Borovecki F, Lovrecic L, Zhou J, Jeong H, Then F, Rosas HD, et al. Genome-wide expression profiling of human blood reveals biomarkers for Huntington's disease. *Proc Natl Acad Sci USA*. 2005;102(31):11023-8.
28. Moran LB, Duke DC, Deprez M, Dexter DT, Pearce RK, Graeber MB. Whole genome expression profiling of the medial and lateral substantia nigra in Parkinson's disease. *Neurogenetics*. 2006;7(1):1-11.
29. Hodges A, Strand AD, Aragaki AK, Kuhn A, Sengstag T, Hughes G, et al. Regional and cellular gene expression changes in human Huntington's disease brain. *Hum Mol Genet*. 2006;15(6):965-77.
30. Lewandowski NM, Ju S, Verbitsky M, Ross B, Geddie ML, Rockenstein E, et al. Polyamine pathway contributes to the pathogenesis of Parkinson disease. *Proc Natl Acad Sci USA*. 2010;107(39):16970-5.
31. JM S, LA F. Effect of brain death on gene expression in liver from rhesus macaque. *NCBI GEO*. 2010.
32. Chen-Plotkin AS, Geser F, Plotkin JB, Clark CM, Kwong LK, Yuan W, et al. Variations in the progranulin gene affect global gene expression in frontotemporal lobar degeneration. *Hum Mol Genet*. 2008;17(10):1349-62.

33. Pathan N, Hemingway CA, Alizadeh AA, Stephens AC, Boldrick JC, Oragui EE, et al. Role of interleukin 6 in myocardial dysfunction of meningococcal septic shock. *Lancet*. 2004;363(9404):203-9.
34. Djavani M, Crasta OR, Zhang Y, Zapata JC, Sobral B, Lechner MG, et al. Gene expression in primate liver during viral hemorrhagic fever. *Virology*. 2009;6:20.
35. Johnston RJ, Poholek AC, DiToro D, Yusuf I, Eto D, Barnett B, et al. Bcl6 and Blimp-1 are reciprocal and antagonistic regulators of T follicular helper cell differentiation. *Science*. 2009;325(5943):1006-10.
36. Corti S, Locatelli F, Papadimitriou D, Donadoni C, Del Bo R, Crimi M, et al. Transplanted ALDHhiSSClo neural stem cells generate motor neurons and delay disease progression of nmd mice, an animal model of SMARD1. *Hum Mol Genet*. 2006;15(2):167-87.
37. Xiang W, Hummel M, Mitteregger G, Pace C, Windl O, Mansmann U, et al. Transcriptome analysis reveals altered cholesterol metabolism during the neurodegeneration in mouse scrapie model. *J Neurochem*. 2007;102(3):834-47.
38. Shi J, Levinson DF, Duan J, Sanders AR, Zheng Y, Pe'er I, et al. Common variants on chromosome 6p22.1 are associated with schizophrenia. *Nature*. 2009;460(7256):753-7.
39. H S, A M, J K, H A, S T, H N. The use of non-amplified RNA samples for gene expression analysis by sensitive microarray. *NCBI GEO*. 2011.
40. Harold D, Abraham R, Hollingworth P, Sims R, Gerrish A, Hamshere ML, et al. Genome-wide association study identifies variants at *CLU* and *PICALM* associated with Alzheimer's disease. *Nat Genet*. 2009;41(10):1088-93.
41. Stevens SL, Leung PY, Vartanian KB, Gopalan B, Yang T, Simon RP, et al. Multiple preconditioning paradigms converge on interferon regulatory factor-dependent signaling to promote tolerance to ischemic brain injury. *J Neurosci*. 2011;31(23):8456-63.
42. Zhang Y, James M, Middleton FA, Davis RL. Transcriptional analysis of multiple brain regions in Parkinson's disease supports the involvement of specific protein processing, energy metabolism, and signaling pathways, and suggests novel disease mechanisms. *Am J Med Genet B Neuropsychiatr Genet*. 2005;137B(1):5-16.
43. Gersten M, Alirezaei M, Marcondes MC, Flynn C, Ravasi T, Ideker T, et al. An integrated systems analysis implicates *EGR1* downregulation in simian immunodeficiency virus encephalitis-induced neural dysfunction. *J Neurosci*. 2009;29(40):12467-76.
44. Zhou T, Chou J, Zhou Y, Simpson DA, Cao F, Bushel PR, et al. Ataxia telangiectasia-mutated dependent DNA damage checkpoint functions regulate gene expression in human fibroblasts. *Mol Cancer Res*. 2007;5(8):813-22.
45. Marshall HD, Chandele A, Jung YW, Meng H, Poholek AC, Parish IA, et al. Differential expression of Ly6C and T-bet distinguish effector and memory Th1 CD4(+) cell properties during viral infection. *Immunity*. 2011;35(4):633-46.
46. Hernandez MR, Agapova OA, Yang P, Salvador-Silva M, Ricard CS, Aoi S. Differential gene expression in astrocytes from human normal and glaucomatous optic nerve head analyzed by cDNA microarray. *Glia*. 2002;38(1):45-64.
47. Howell GR, Macalinao DG, Sousa GL, Walden M, Soto I, Kneeland SC, et al. Molecular clustering identifies complement and endothelin induction as early events in a mouse model of glaucoma. *J Clin Invest*. 2011;121(4):1429-44.

48. R K, der Brug M v, J V, J D, S S, A R, et al. Gene expression changes across multiple regions of the Parkinson's disease brain. NCBI GEO. 2011.
49. G M, A A. Preclinical CNS changes following peripheral murine RML prion challenge. NCBI GEO. 2007.
50. Maret S, Dorsaz S, Gurcel L, Pradervand S, Petit B, Pfister C, et al. Homer1a is a core brain molecular correlate of sleep loss. *Proc Natl Acad Sci USA*. 2007;104(50):20090-5.
51. Williams C, Mehrian Shai R, Wu Y, Hsu YH, Sitzler T, Spann B, et al. Transcriptome analysis of synaptoneuroosomes identifies neuroplasticity genes overexpressed in incipient Alzheimer's disease. *PLoS ONE*. 2009;4(3):e4936.
52. Nunez-Iglesias J, Liu CC, Morgan TE, Finch CE, Zhou XJ. Joint genome-wide profiling of miRNA and mRNA expression in Alzheimer's disease cortex reveals altered miRNA regulation. *PLoS ONE*. 2010;5(2):e8898.
53. Kalia V, Sarkar S, Subramaniam S, Haining WN, Smith KA, Ahmed R. Prolonged interleukin-2 $\alpha$  expression on virus-specific CD8<sup>+</sup> T cells favors terminal-effector differentiation in vivo. *Immunity*. 2010;32(1):91-103.
54. Nagy GR, Gyorffy B, Galamb O, Molnar B, Nagy B, Papp Z. Use of routinely collected amniotic fluid for whole-genome expression analysis of polygenic disorders. *Clin Chem*. 2006;52(11):2013-20.
55. Steele MR, Inman DM, Calkins DJ, Horner PJ, Vetter ML. Microarray analysis of retinal gene expression in the DBA/2J model of glaucoma. *Invest Ophthalmol Vis Sci*. 2006;47(3):977-85.
56. Mackiewicz M, Shockley KR, Romer MA, Galante RJ, Zimmerman JE, Naidoo N, et al. Macromolecule biosynthesis: a key function of sleep. *Physiol Genomics*. 2007;31(3):441-57.
57. Narayan S, Tang B, Head SR, Gilmartin TJ, Sutcliffe JG, Dean B, et al. Molecular profiles of schizophrenia in the CNS at different stages of illness. *Brain Res*. 2008;1239:235-48.
58. Thompson CL, Wisor JP, Lee CK, Pathak SD, Gerashchenko D, Smith KA, et al. Molecular and anatomical signatures of sleep deprivation in the mouse brain. *Front Neurosci*. 2010;4:165.
59. Pawlowski TL, Bellush LL, Wright AW, Walker JP, Colvin RA, Huentelman MJ. Hippocampal gene expression changes during age-related cognitive decline. *Brain Res*. 2009;1256:101-10.
60. C H. Entrapment Neuropathy Results in Different MicroRNAs Expression Patterns from Denervation Injury in Rats. NCBI GEO. 2010.
61. Templeton JP, Nassr M, Vazquez-Chona F, Freeman-Anderson NE, Orr WE, Williams RW, et al. Differential response of C57BL/6J mouse and DBA/2J mouse to optic nerve crush. *BMC Neurosci*. 2009;10:90.
62. Ebert AD, Yu J, Rose FF, Mattis VB, Lorson CL, Thomson JA, et al. Induced pluripotent stem cells from a spinal muscular atrophy patient. *Nature*. 2009;457(7227):277-80.
63. Singh MK, Scott TF, LaFramboise WA, Hu FZ, Post JC, Ehrlich GD. Gene expression changes in peripheral blood mononuclear cells from multiple sclerosis patients undergoing beta-interferon therapy. *J Neurol Sci*. 2007;258(1-2):52-9.
64. Baranzini SE, Wang J, Gibson RA, Galwey N, Naegelin Y, Barkhof F, et al. Genome-wide association analysis of susceptibility and clinical phenotype in multiple sclerosis. *Hum Mol Genet*. 2009;18(4):767-78.

65. Keller A, Leidinger P, Bauer A, Elsharawy A, Haas J, Backes C, et al. Toward the blood-borne miRNome of human diseases. *Nat Methods*. 2011;8(10):841-3.
66. Brennand KJ, Simone A, Jou J, Gelboin-Burkhardt C, Tran N, Sangar S, et al. Modelling schizophrenia using human induced pluripotent stem cells. *Nature*. 2011;473(7346):221-5.
67. Lee JH, Cheng R, Barral S, Reitz C, Medrano M, Lantigua R, et al. Identification of novel loci for Alzheimer disease and replication of *CLU*, *PICALM*, and *BIN1* in Caribbean Hispanic individuals. *Arch Neurol*. 2011;68(3):320-8.
68. Naj AC, Jun G, Beecham GW, Wang LS, Vardarajan BN, Buross J, et al. Common variants at *MS4A4/MS4A6E*, *CD2AP*, *CD33* and *EPHA1* are associated with late-onset Alzheimer's disease. *Nat Genet*. 2011;43(5):436-41.
69. Hollingworth P, Sweet R, Sims R, Harold D, Russo G, Abraham R, et al. Genome-wide association study of Alzheimer's disease with psychotic symptoms. *Mol Psychiatry*. 2012;17(12):1316-27.
70. Lionel AC, Crosbie J, Barbosa N, Goodale T, Thiruvahindrapuram B, Rickaby J, et al. Rare copy number variation discovery and cross-disorder comparisons identify risk genes for ADHD. *Sci Transl Med*. 2011;3(95):95ra75.
71. Sakai Y, Shaw CA, Dawson BC, Dugas DV, Al-Mohtaseb Z, Hill DE, et al. Protein interactome reveals converging molecular pathways among autism disorders. *Sci Transl Med*. 2011;3(86):86ra49.
72. Ikram MA, Seshadri S, Bis JC, Fornage M, DeStefano AL, Aulchenko YS, et al. Genomewide association studies of stroke. *N Engl J Med*. 2009;360(17):1718-28.
73. Simon-Sanchez J, Schulte C, Bras JM, Sharma M, Gibbs JR, Berg D, et al. Genome-wide association study reveals genetic risk underlying Parkinson's disease. *Nat Genet*. 2009;41(12):1308-12.
74. Shyn SI, Shi J, Kraft JB, Potash JB, Knowles JA, Weissman MM, et al. Novel loci for major depression identified by genome-wide association study of Sequenced Treatment Alternatives to Relieve Depression and meta-analysis of three studies. *Mol Psychiatry*. 2011;16(2):202-15.
75. Shi J, Potash JB, Knowles JA, Weissman MM, Coryell W, Scheftner WA, et al. Genome-wide association study of recurrent early-onset major depressive disorder. *Mol Psychiatry*. 2011;16(2):193-201.
76. Terracciano A, Tanaka T, Sutin AR, Sanna S, Deiana B, Lai S, et al. Genome-wide association scan of trait depression. *Biol Psychiatry*. 2010;68(9):811-7.
77. Wray NR, Pergadia ML, Blackwood DH, Penninx BW, Gordon SD, Nyholt DR, et al. Genome-wide association study of major depressive disorder: new results, meta-analysis, and lessons learned. *Mol Psychiatry*. 2012;17(1):36-48.
78. Han MH, Lundgren DH, Jaiswal S, Chao M, Graham KL, Garris CS, et al. Janus-like opposing roles of *CD47* in autoimmune brain inflammation in humans and mice. *J Exp Med*. 2012;209(7):1325-34.
79. Need AC, Ge D, Weale ME, Maia J, Feng S, Heinzen EL, et al. A genome-wide investigation of SNPs and CNVs in schizophrenia. *PLoS Genet*. 2009;5(2):e1000373.
80. Ripke S, Sanders AR, Kendler KS, Levinson DF, Sklar P, Holmans PA, et al. Genome-wide association study identifies five new schizophrenia loci. *Nat Genet*. 2011;43(10):969-76.

81. Gilli F, Lindberg RL, Valentino P, Marnetto F, Malucchi S, Sala A, et al. Learning from nature: pregnancy changes the expression of inflammation-related genes in patients with multiple sclerosis. *PLoS ONE*. 2010;5(1):e8962.
82. Haque A, Best SE, Ammerdorffer A, Desbarrieres L, de Oca MM, Amante FH, et al. Type I interferons suppress CD4<sup>+</sup> T-cell-dependent parasite control during blood-stage Plasmodium infection. *Eur J Immunol*. 2011;41(9):2688-98.
83. G C, R B, S P, R V, F G, H P, et al. A Gene Expression Phenotype In Lymphocytes From Friedreich's Ataxia Patients. NCBI GEO. 2011.
84. Yilmaz G, Alexander JS, Erkuran Yilmaz C, Granger DN. Induction of neuro-protective/regenerative genes in stem cells infiltrating post-ischemic brain tissue. *Exp Transl Stroke Med*. 2010;2(1):11.
85. Ryan MM, Lockstone HE, Huffaker SJ, Wayland MT, Webster MJ, Bahn S. Gene expression analysis of bipolar disorder reveals downregulation of the ubiquitin cycle and alterations in synaptic genes. *Mol Psychiatry*. 2006;11(10):965-78.
86. Chen C, Cheng L, Grennan K, Pibiri F, Zhang C, Badner JA, et al. Two gene co-expression modules differentiate psychotics and controls. *Mol Psychiatry*. 2012.
87. Di Giovanni S, Knoblach SM, Brandoli C, Aden SA, Hoffman EP, Faden AI. Gene profiling in spinal cord injury shows role of cell cycle in neuronal death. *Ann Neurol*. 2003;53(4):454-68.
88. Agudo M, Perez-Marin MC, Lonngren U, Sobrado P, Conesa A, Canovas I, et al. Time course profiling of the retinal transcriptome after optic nerve transection and optic nerve crush. *Mol Vis*. 2008;14:1050-63.
89. Wang Y, Tang X, Yu B, Gu Y, Yuan Y, Yao D, et al. Gene network revealed involvements of Birc2, Birc3 and Tnfrsf1a in anti-apoptosis of injured peripheral nerves. *PLoS ONE*. 2012;7(9):e43436.
90. MG K, DC C, RR DJ, AA TA, RH K, L K, et al. Down-stream effects in demyelinating neuropathies. NCBI GEO. 2007.
91. Tezak Z, Hoffman EP, Lutz JL, Fedczyna TO, Stephan D, Bremer EG, et al. Gene expression profiling in DQA1\*0501+ children with untreated dermatomyositis: a novel model of pathogenesis. *J Immunol*. 2002;168(8):4154-63.
92. CA VK, HD V, GV B, CG I, VP K, JM S, et al. Induction of the neuronal major histocompatibility complex class I and paired immunoglobulin-like receptor B pathway in the hippocampus with aging and cognitive decline. NCBI GEO. 2011.
93. Wherry EJ, Ha SJ, Kaech SM, Haining WN, Sarkar S, Kalia V, et al. Molecular signature of CD8<sup>+</sup> T cell exhaustion during chronic viral infection. *Immunity*. 2007;27(4):670-84.
94. Shetty RS, Bose SC, Nickell MD, McIntyre JC, Hardin DH, Harris AM, et al. Transcriptional changes during neuronal death and replacement in the olfactory epithelium. *Mol Cell Neurosci*. 2005;30(1):90-107.
95. Barrette B, Calvo E, Vallieres N, Lacroix S. Transcriptional profiling of the injured sciatic nerve of mice carrying the Wld(S) mutant gene: identification of genes involved in neuroprotection, neuroinflammation, and nerve regeneration. *Brain Behav Immun*. 2010;24(8):1254-67.
96. Chen J, Lee G, Fanous AH, Zhao Z, Jia P, O'Neill A, et al. Two non-synonymous markers in PTPN21, identified by genome-wide association study



- data-mining and replication, are associated with schizophrenia. *Schizophr Res.* 2011;131(1-3):43-51.
97. Haberman RP, Colantuoni C, Stocker AM, Schmidt AC, Pedersen JT, Gallagher M. Prominent hippocampal CA3 gene expression profile in neurocognitive aging. *Neurobiol Aging.* 2011;32(9):1678-92.
98. Aerssens J, Hillsley K, Peeters PJ, de Hoogt R, Stanis A, Lin JH, et al. Alterations in the brain-gut axis underlying visceral chemosensitivity in *Nippostrongylus brasiliensis*-infected mice. *Gastroenterology.* 2007;132(4):1375-87.
99. Smith LR, Chambers HG, Subramaniam S, Lieber RL. Transcriptional abnormalities of hamstring muscle contractures in children with cerebral palsy. *PLoS ONE.* 2012;7(8):e40686.
100. Pereira C. E-MEXP-1035 - Transcription profiling of macrophages from healthy human individuals and those with Whipple disease, endocarditis, meningitis or pneumococcus infection. *ArrayExpress.* 2008.
101. Savitz J, Frank MB, Victor T, Bebak M, Marino JH, Bellgowan PS, et al. Inflammation and neurological disease-related genes are differentially expressed in depressed patients with mood disorders and correlate with morphometric and functional imaging abnormalities. *Brain Behav Immun.* 2013;31:161-71.
102. Hafler DA, Compston A, Sawcer S, Lander ES, Daly MJ, De Jager PL, et al. Risk alleles for multiple sclerosis identified by a genomewide study. *N Engl J Med.* 2007;357(9):851-62.
103. Bahlo M, Booth DR, Broadley SA, Brown MA, Foote SJ, Griffiths LR, et al. Genome-wide association study identifies new multiple sclerosis susceptibility loci on chromosomes 12 and 20. *Nat Genet.* 2009;41(7):824-8.
104. Sawcer S, Hellenthal G, Pirinen M, Spencer CC, Patsopoulos NA, Moutsianas L, et al. Genetic risk and a primary role for cell-mediated immune mechanisms in multiple sclerosis. *Nature.* 2011;476(7359):214-9.
105. Wienecke J, Westerdahl AC, Hultborn H, Kiehn O, Ryge J. Global gene expression analysis of rodent motor neurons following spinal cord injury associates molecular mechanisms with development of postinjury spasticity. *J Neurophysiol.* 2010;103(2):761-78.
106. Ryge J, Winther O, Wienecke J, Sandelin A, Westerdahl AC, Hultborn H, et al. Transcriptional regulation of gene expression clusters in motor neurons following spinal cord injury. *BMC Genomics.* 2010;11:365.
107. Michaelevski I, Segal-Ruder Y, Rozenbaum M, Medzihradzky KF, Shalem O, Coppola G, et al. Signaling to transcription networks in the neuronal retrograde injury response. *Sci Signal.* 2010;3(130):ra53.
108. O'Donovan MC, Craddock N, Norton N, Williams H, Peirce T, Moskvina V, et al. Identification of loci associated with schizophrenia by genome-wide association and follow-up. *Nat Genet.* 2008;40(9):1053-5.
109. Lesnick TG, Papapetropoulos S, Mash DC, Ffrench-Mullen J, Shehadeh L, de Andrade M, et al. A genomic pathway approach to a complex disease: axon guidance and Parkinson disease. *PLoS Genet.* 2007;3(6):e98.
110. Otaegui D, Mostafavi S, Bernard CC, Lopez de Munain A, Mousavi P, Oksenberg JR, et al. Increased transcriptional activity of milk-related genes following the active phase of experimental autoimmune encephalomyelitis and multiple sclerosis. *J Immunol.* 2007;179(6):4074-82.

111. Eisenberg I, Novershtern N, Itzhaki Z, Becker-Cohen M, Sadeh M, Willems PH, et al. Mitochondrial processes are impaired in hereditary inclusion body myopathy. *Hum Mol Genet.* 2008;17(23):3663-74.
112. X L. Patterns of gene Expression during the Spinal cord Injury/Regeneration. NCBI GEO. 2011.
113. Lunnon K, Teeling JL, Tutt AL, Cragg MS, Glennie MJ, Perry VH. Systemic inflammation modulates Fc receptor expression on microglia during chronic neurodegeneration. *J Immunol.* 2011;186(12):7215-24.
114. Crimi M, Bordoni A, Menozzi G, Riva L, Fortunato F, Galbiati S, et al. Skeletal muscle gene expression profiling in mitochondrial disorders. *FASEB J.* 2005;19(7):866-8.
115. Burger C, Lopez MC, Feller JA, Baker HV, Muzyczka N, Mandel RJ. Changes in transcription within the CA1 field of the hippocampus are associated with age-related spatial learning impairments. *Neurobiol Learn Mem.* 2007;87(1):21-41.
116. Naj AC, Beecham GW, Martin ER, Gallins PJ, Powell EH, Konidari I, et al. Dementia revealed: novel chromosome 6 locus for late-onset Alzheimer disease provides genetic evidence for folate-pathway abnormalities. *PLoS Genet.* 2010;6(9):e1001130.
117. A B, G B. Expression data from human Huntington fibroblasts. NCBI GEO. 2013.
118. Abraham R, Moskvina V, Sims R, Hollingworth P, Morgan A, Georgieva L, et al. A genome-wide association study for late-onset Alzheimer's disease using DNA pooling. *BMC Med Genomics.* 2008;1:44.
119. HA D, RJ G. Microarray analysis of male flies selected for increased aggressive behavior. NCBI GEO. 2006.
120. Dierick HA, Greenspan RJ. Molecular analysis of flies selected for aggressive behavior. *Nat Genet.* 2006;38(9):1023-31.
121. Hodges A, Hughes G, Brooks S, Elliston L, Holmans P, Dunnett SB, et al. Brain gene expression correlates with changes in behavior in the R6/1 mouse model of Huntington's disease. *Genes Brain Behav.* 2008;7(3):288-99.
122. Hoeger S, Bergstraesser C, Selhorst J, Fontana J, Birck R, Waldherr R, et al. Modulation of brain dead induced inflammation by vagus nerve stimulation. *Am J Transplant.* 2010;10(3):477-89.
123. Borges K, Shaw R, Dingledine R. Gene expression changes after seizure preconditioning in the three major hippocampal cell layers. *Neurobiol Dis.* 2007;26(1):66-77.
124. Uriguen L, Arteta D, Diez-Alarcia R, Ferrer-Alcon M, Diaz A, Pazos A, et al. Gene expression patterns in brain cortex of three different animal models of depression. *Genes Brain Behav.* 2008;7(6):649-58.
125. Smith LR, Ponten E, Hedstrom Y, Ward SR, Chambers HG, Subramaniam S, et al. Novel transcriptional profile in wrist muscles from cerebral palsy patients. *BMC Med Genomics.* 2009;2:44.
126. Beech RD, Lowthert L, Leffert JJ, Mason PN, Taylor MM, Umlauf S, et al. Increased peripheral blood expression of electron transport chain genes in bipolar depression. *Bipolar Disord.* 2010;12(8):813-24.
127. Maratou K, Wallace VC, Hasnie FS, Okuse K, Hosseini R, Jina N, et al. Comparison of dorsal root ganglion gene expression in rat models of traumatic and HIV-associated neuropathic pain. *Eur J Pain.* 2009;13(4):387-98.

128. Lukas TJ, Miao H, Chen L, Riordan SM, Li W, Crabb AM, et al. Susceptibility to glaucoma: differential comparison of the astrocyte transcriptome from glaucomatous African American and Caucasian American donors. *Genome Biol.* 2008;9(7):R111.
129. De Jager PL, Shulman JM, Chibnik LB, Keenan BT, Raj T, Wilson RS, et al. A genome-wide scan for common variants affecting the rate of age-related cognitive decline. *Neurobiol Aging.* 2012;33(5):1-15.
130. Kasperaviciute D, Catarino CB, Heinzen EL, Depondt C, Cavalleri GL, Caboclo LO, et al. Common genetic variation and susceptibility to partial epilepsies: a genome-wide association study. *Brain.* 2010;133(Pt 7):2136-47.
131. Baum AE, Akula N, Cabanero M, Cardona I, Corona W, Klemens B, et al. A genome-wide association study implicates diacylglycerol kinase eta (DGKH) and several other genes in the etiology of bipolar disorder. *Mol Psychiatry.* 2008;13(2):197-207.
132. Zhou Y, Gong B, Lin F, Rother RP, Medof ME, Kaminski HJ. Anti-C5 antibody treatment ameliorates weakness in experimentally acquired myasthenia gravis. *J Immunol.* 2007;179(12):8562-7.
133. W O. Ogle-5P01NS037520-05. NCBI GEO. 2005.
134. Gonzalez de Aguilar JL, Niederhauser-Wiederkehr C, Halter B, De Tapia M, Di Scala F, Demougin P, et al. Gene profiling of skeletal muscle in an amyotrophic lateral sclerosis mouse model. *Physiol Genomics.* 2008;32(2):207-18.
135. Hinney A, Scherag A, Jarick I, Albayrak O, Putter C, Pechlivanis S, et al. Genome-wide association study in German patients with attention deficit/hyperactivity disorder. *Am J Med Genet B Neuropsychiatr Genet.* 2011;156B(8):888-97.
136. Hillmeister P, Lehmann KE, Bondke A, Witt H, Duelsner A, Gruber C, et al. Induction of cerebral arteriogenesis leads to early-phase expression of protease inhibitors in growing collaterals of the brain. *J Cereb Blood Flow Metab.* 2008;28(11):1811-23.
137. Guo Y, Baum LW, Sham PC, Wong V, Ng PW, Lui CH, et al. Two-stage genome-wide association study identifies variants in CAMSAP1L1 as susceptibility loci for epilepsy in Chinese. *Hum Mol Genet.* 2012;21(5):1184-9.
138. Yosifova A, Mushiroda T, Kubo M, Takahashi A, Kamatani Y, Kamatani N, et al. Genome-wide association study on bipolar disorder in the Bulgarian population. *Genes Brain Behav.* 2011;10(7):789-97.
139. Almeida S, Zhang Z, Coppola G, Mao W, Futai K, Karydas A, et al. Induced pluripotent stem cell models of progranulin-deficient frontotemporal dementia uncover specific reversible neuronal defects. *Cell Rep.* 2012;2(4):789-98.
140. Jiang Q, Ho YY, Hao L, Nichols Berrios C, Chakravarti A. Copy number variants in candidate genes are genetic modifiers of Hirschsprung disease. *PLoS ONE.* 2011;6(6):e21219.
141. Vissers LE, de Ligt J, Gilissen C, Janssen I, Stehouwer M, de Vries P, et al. A de novo paradigm for mental retardation. *Nat Genet.* 2010;42(12):1109-12.
142. Lovegrove FE, Gharib SA, Patel SN, Hawkes CA, Kain KC, Liles WC. Expression microarray analysis implicates apoptosis and interferon-responsive mechanisms in susceptibility to experimental cerebral malaria. *Am J Pathol.* 2007;171(6):1894-903.

143. Muglia P, Tozzi F, Galwey NW, Francks C, Upmanyu R, Kong XQ, et al. Genome-wide association study of recurrent major depressive disorder in two European case-control cohorts. *Mol Psychiatry*. 2010;15(6):589-601.
144. Iwamoto K, Bundo M, Kato T. Altered expression of mitochondria-related genes in postmortem brains of patients with bipolar disorder or schizophrenia, as revealed by large-scale DNA microarray analysis. *Hum Mol Genet*. 2005;14(2):241-53.
145. Athanasiu L, Mattingsdal M, Kahler AK, Brown A, Gustafsson O, Agartz I, et al. Gene variants associated with schizophrenia in a Norwegian genome-wide study are replicated in a large European cohort. *J Psychiatr Res*. 2010;44(12):748-53.
146. Eppig JT, Blake JA, Bult CJ, Kadin JA, Richardson JE. The mouse genome database (MGD): new features facilitating a model system. *Nucleic Acids Res*. 2007;35(Database issue):D630-7.
147. Mead S, Uphill J, Beck J, Poulter M, Campbell T, Lowe J, et al. Genome-wide association study in multiple human prion diseases suggests genetic risk factors additional to PRNP. *Hum Mol Genet*. 2012;21(8):1897-906.
148. SG G, MH K, RH K, MM H, G A, B J, et al. Neuroinflammation in Advanced Canine Glaucoma. *NCBI GEO*. 2010.
149. Krishnan V, Han MH, Graham DL, Berton O, Renthall W, Russo SJ, et al. Molecular adaptations underlying susceptibility and resistance to social defeat in brain reward regions. *Cell*. 2007;131(2):391-404.
150. Sonuga-Barke EJ, Lasky-Su J, Neale BM, Oades R, Chen W, Franke B, et al. Does parental expressed emotion moderate genetic effects in ADHD? An exploration using a genome wide association scan. *Am J Med Genet B Neuropsychiatr Genet*. 2008;147B(8):1359-68.
151. Whitby H, Tsalenko A, Aston E, Tsang P, Mitchell S, Bayrak-Toydemir P, et al. Benign copy number changes in clinical cytogenetic diagnostics by array CGH. *Cytogenet Genome Res*. 2008;123(1-4):94-101.
152. Segman RH, Shefi N, Goltser-Dubner T, Friedman N, Kaminski N, Shalev AY. Peripheral blood mononuclear cell gene expression profiles identify emergent post-traumatic stress disorder among trauma survivors. *Mol Psychiatry*. 2005;10(5):500-13.
153. AF F, Y A, JI M-S, B B, R S, H T, et al. A DNA Methylation Fingerprint of 1,628 Human Samples. *NCBI GEO*. 2011.
154. McRae AF, Matigian NA, Vadlamudi L, Mulley JC, Mowry B, Martin NG, et al. Replicated effects of sex and genotype on gene expression in human lymphoblastoid cell lines. *Hum Mol Genet*. 2007;16(4):364-73.
