# Supplementary material for: Uncovering the Hidden Risk Architecture of the Schizophrenias: Confirmation in Three Independent Genome-Wide Association Studies
Source: Atypon-hosted journal article supplement (doi:10.1176/appi.ajp.2014.14040435), 2014-09-15
Supplement: appi.ajp.2014.14040435.ds008_table-s6.pdf [file appi.ajp.2014.14040435.ds008_table-s6.pdf]

**Table S6: Phenotypic Feature Grouping by PCA and Clustering the Molecular Genetics of Schizophrenia Sample (Group), and Validation with the Literature and Expert Knowledge (Symptoms)**

| <b>Phenotypic features (DIGS)</b> | <b>Group</b> | <b>Symptoms</b> |
|-----------------------------------|--------------|-----------------|
| Jealousy_Delusions[I11110]        | 1            | +               |
| Guilt_Sin_Delusions[I11180]       | 1            | -               |
| Religious_Delusions[I11320]       | 1            | +/-             |
| Somatic_Delusions[I11390]         | 1            | -               |
| Del_of_Ref[I11460]                | 1            | +               |
| Being_Controlled[I11530]          | 1            | -               |
| Del_Mind_Reading[I11600]          | 1            | -               |
| Thought_Broadcasting[I11670]      | 1            | -               |
| Thought_Insert[I11740]            | 1            | -               |
| Thought_Withdraw[I11810]          | 1            | -               |
| Running_Comment[I12100]           | 1            | -               |
| Aud_2+_Voices[I12170]             | 1            | +               |
| Thought_Echo[I12240]              | 1            | -               |
| Somatic_Tactile[I12520]           | 1            | -               |
| Olfactory_Hal[I12590]             | 1            | -               |
| Gustatory_Hal[I12730]             | 1            | -               |
| Mood_Incongruent_Hal[I17706]      | 1            | -               |
| Odd_Behavior[I12920]              | 1            | -               |
| Disorganized_Speech[I12990]       | 1            | -               |
| Odd_Speech[I13060]                | 1            | -               |
| Avolition_Apathy[I13240]          | 1            | -               |
| No_Emotions[I13310]               | 1            | -               |
| Disorg/Inapp_Behav[I21050]        | 1            | -               |
| Alogia[I21400]                    | 1            | -               |
| cs_A1a                            | 2            | -               |
| cs_A2a                            | 2            | -               |
| cs_A3                             | 2            | -               |
| cs_A4                             | 2            | -               |
| cs_A5                             | 2            | -               |
| Return_Normal_for_2Months[I13600] | 2            | -               |
| DSM4_Definite_Bizarre_Del[A60b]   | 2            | +/-             |
| DSM4_Hallucinations[A60c]         | 2            | +               |
| DSM4_2+Voices_Commented[A60d]     | 2            | -               |
| DSM4_Disorganized_Speech[A60e]    | 2            | -               |
| DSM4_Gross_Disorganization[A60f]  | 2            | -               |
| DSM4_Negative_Sx[A60g]            | 2            | -               |
| cs_A1                             | 3            | +               |
| cs_A2                             | 3            | +               |

|                                                  |   |     |
|--------------------------------------------------|---|-----|
| Auditory_Halns_Ever[I10920]                      | 3 | +   |
| Persecutory_Delusions[I11030]                    | 3 | +   |
| Delusion_Fragment[I12000]                        | 3 | -   |
| Delusion_Widespread[I12010]                      | 3 | +   |
| Delusion_Bizarre[I12020]                         | 3 | +   |
| AH(Voices_Noises_Music)[I12030]                  | 3 | +   |
| Pattern_Sx[I14350]                               | 3 | +   |
| Severity_Pattern[I14360]                         | 3 | +   |
| Unable_To_Function_Most_Time_Since_Onset[I21500] | 3 | +/- |
| Classification_Longitud_SZ[I21560]               | 3 | +   |
| Psychosis_without_Dep_Mania[A620]                | 3 | +   |
| Psychosis_without_Dep_Mania_>=1week[A62a]        | 3 | +   |

---
